# Supplementary material for: Rapid Screening of Ellagitannins in Natural Sources via Targeted Reporter Ion Triggered Tandem Mass Spectrometry
Source: PubMed Central journal article supplement (PMC6039434; doi:10.1038/s41598-018-27708-3), 2018-07-10
Supplement: 41598_2018_27708_MOESM1_ESM.pdf [file 41598_2018_27708_MOESM1_ESM.pdf]

# Rapid Screening of Ellagitannins in Natural Sources via Targeted Reporter Ion Triggered Tandem Mass Spectrometry

Jeremiah J. Bowers,<sup>a</sup> Harsha P. Gunawardena,<sup>b</sup> Anaëlle Cornu,<sup>c</sup> Ashwini S. Narvekar,<sup>a</sup> Antoine Richieu,<sup>c</sup> Denis Deffieux,<sup>c</sup> Stéphane Quideau,<sup>c</sup> and Nishanth Tharayil<sup>a\*</sup>

Department of Plant and Environmental Sciences  
Clemson University  
Clemson, SC 29631

<sup>a</sup>Department of Plant and Environmental Sciences, Clemson University, Clemson, SC 29631

<sup>b</sup>Janssen Research and Development, The Janssen Pharmaceutical Companies of Johnson and Johnson, Spring House, PA 19477

<sup>c</sup>Univ. Bordeaux, ISM (CNRS-UMR 5255), 351 cours de la Libération, 33405 Talence Cedex, France

\* Corresponding author: Dr. Nishanth Tharayil

E-mail: [ntharay@clemson.edu](mailto:ntharay@clemson.edu)

Tel: (864) 656-4453

## Abstract:

Further information on sample preparation, data extraction, analyzer and filter optimization, chemical structures of standard compounds, CID spectra of standard compounds, elution and infusion MS of standard compounds, HCD summary tables and figures, standard dilution EIC profiles, TRT specificity and control figures, full tables of species classified as ellagitannins under different screen conditions, figures illustrating data points for screen and TRT variants of the 466 strawberry isobars, and annotated tables for comparison of previously reported non-isomeric ellagitannins is contained herein. A full table of contents has been provided for ease of navigation.

# Supporting Information

## Table of Contents

|                                                                 |      |
|-----------------------------------------------------------------|------|
| Experimental.....                                               | S-6  |
| Strawberry leaf extraction.....                                 | S-6  |
| Infusion MS/MS analysis.....                                    | S-6  |
| Data Analysis.....                                              | S-7  |
| Software.....                                                   | S-7  |
| Proteome Discoverer workflow.....                               | S-7  |
| Perl and Excel workflow.....                                    | S-8  |
| Results and Discussion.....                                     | S-9  |
| Analyzer Optimization.....                                      | S-9  |
| Mass Range, MIPS, Intensity, and Z Filters.....                 | S-9  |
| HCD Dependent Scans, DE, and Apex Detection.....                | S-9  |
| MS Analyzer: Resolution and Injection Time.....                 | S-10 |
| CID Analyzer: OT vs IT, Resolution and Injection Time.....      | S-10 |
| Mass Trigger Validation.....                                    | S-11 |
| Control Experiments.....                                        | S-11 |
| Filter Optimization.....                                        | S-12 |
| Proteome Discoverer, Isobaric Grouping Parameters.....          | S-12 |
| Screen Selection Parameters.....                                | S-13 |
| Supplementary Figures.....                                      | S-14 |
| Figure S-1: Molecular Structures, Ellagitannin Standards.....   | S-14 |
| Figure S-2: CID, Higher Charge States, MS <sup>2</sup> .....    | S-15 |
| Figure S-3: CID 457, MS <sup>3</sup> .....                      | S-16 |
| Figure S-4: CID 487 MS <sup>3</sup> , 465 MS <sup>4</sup> ..... | S-17 |
| Figure S-5: CID, Lower Charge States, MS <sup>2</sup> .....     | S-18 |
| Figure S-6: Infusion MS.....                                    | S-19 |
| Figure S-7: HCD Series, [M-2H] <sup>2-</sup> .....              | S-20 |
| Figure S-8: Elution MS.....                                     | S-21 |

|                                                                             |      |
|-----------------------------------------------------------------------------|------|
| Figure S-9: HCD Series, [M-3H] <sup>3+</sup> .....                          | S-22 |
| Figure S-10: MS <sup>2</sup> Spectra – CID 20 and HCD 20.....               | S-23 |
| Figure S-11: CID Data Points – MS 50K, 50 ms .....                          | S-24 |
| Figure S-12: CID Data Points – MS 30K, 50 ms .....                          | S-25 |
| Figure S-13: CID Data Points – MS 15K, 50 ms .....                          | S-26 |
| Figure S-14: CID Data Points – MS 50K, 25 ms .....                          | S-27 |
| Figure S-15: CID Data Points – MS 30K, 25 ms .....                          | S-28 |
| Figure S-16: CID Data Points – MS 15K, 25 ms .....                          | S-29 |
| Figure S-17: CID Data Points – CID 50K, AGC 5e4 .....                       | S-30 |
| Figure S-18: CID Data Points – CID 30K, AGC 5e4 .....                       | S-31 |
| Figure S-19: CID Data Points – CID 15K, AGC 5e4 .....                       | S-32 |
| Figure S-20: CID Data Points – CID 50K, AGC 1e4 .....                       | S-33 |
| Figure S-21: CID Data Points – CID 30K, AGC 1e4 .....                       | S-34 |
| Figure S-22: CID Data Points – CID 15K, AGC 1e4 .....                       | S-35 |
| Figure S-23: CID Data Points – IT Normal, AGC 1e4 .....                     | S-36 |
| Figure S-24: CID Data Points – IT Rapid, AGC 1e4.....                       | S-37 |
| Figure S-25: CID Data Points – IT Turbo, AGC 1e4 .....                      | S-38 |
| Figure S-26: CID Spectra – Orbitrap vs Ion Trap.....                        | S-39 |
| Figure S-27: CID EICs – Standards, 40 ng to 1.25 ng .....                   | S-40 |
| Figure S-28: CID Data Points – Standards, 5 ng .....                        | S-41 |
| Figure S-29: CID Data Points – Standards, 2.5 ng .....                      | S-42 |
| Figure S-30: CID Data Points – Standards, 1.25 ng .....                     | S-43 |
| Figure S-31: CID Data Points – Single Isomeric Injections .....             | S-44 |
| Figure S-32: Mixture Specificity, T-3RT.....                                | S-45 |
| Figure S-33: Mixture Specificity, T-2RT.....                                | S-46 |
| Figure S-34: Mixture Specificity, T-1RT.....                                | S-47 |
| Figure S-35: Mass Trigger Controls, T-3RT.....                              | S-48 |
| Figure S-36: Mass Trigger Controls, T-2RT.....                              | S-49 |
| Figure S-37: Mass Trigger Controls, T-1RT.....                              | S-50 |
| Figure S-38: HCD Product Ions - Potential Interferents .....                | S-51 |
| Figure S-39: CID Data Points, 466 <i>m/z</i> – Screen Variants, T-3RT ..... | S-52 |
| Figure S-40: CID Data Points, 466 <i>m/z</i> – Screen Variants, T-2RT ..... | S-53 |

|                                                                                            |       |
|--------------------------------------------------------------------------------------------|-------|
| Figure S-41: Proposed Structures – Ions of Interest .....                                  | S-54  |
| Supplementary Tables.....                                                                  | S-55  |
| Table S-1: Precursor CID, 457 Major Product Ion .....                                      | S-55  |
| Table S-2: Precursor CID, 487 Major Product Ion .....                                      | S-55  |
| Table S-3: CID 457, MS <sup>3</sup> .....                                                  | S-56  |
| Table S-4: CID 487, MS <sup>3</sup> .....                                                  | S-56  |
| Table S-5: CID 465, MS <sup>4</sup> .....                                                  | S-56  |
| Table S-6: $\sum$ (249, 275, 301) Intensities, Discrete HCD Series.....                    | S-57  |
| Table S-7: $\sum$ (249, 275, 301) Intensities, Theoretical Stepped (+/-10) HCD Series..... | S-57  |
| Table S-8: $\sum$ (249, 275, 301) Intensities, Stepped HCD Series .....                    | S-58  |
| Table S-9: Strawberry, Screen [I], T-3RT .....                                             | S-59  |
| Table S-10: Strawberry, Screen [II], T-3RT .....                                           | S-60  |
| Table S-11: Strawberry, Screen [III], T-3RT.....                                           | S-61  |
| Table S-12: Strawberry, Screen [IV], T-3RT.....                                            | S-62  |
| Table S-13: Strawberry, Screen [V], T-3RT.....                                             | S-64  |
| Table S-14: Strawberry, Screen [VI], T-3RT.....                                            | S-66  |
| Table S-15: Strawberry, Screen [VII], T-3RT .....                                          | S-67  |
| Table S-16: Strawberry, Screen [VIII], T-3RT .....                                         | S-68  |
| Table S-17: Strawberry, Screen [IX], T-3RT.....                                            | S-69  |
| Table S-18: Strawberry, Screen [X], T-3RT.....                                             | S-70  |
| Table S-19: Strawberry, Screen [XI], T-3RT.....                                            | S-71  |
| Table S-20: Strawberry, Screen [I], T-2RT .....                                            | S-72  |
| Table S-21: Strawberry, Screen [II], T-2RT .....                                           | S-74  |
| Table S-22: Strawberry, Screen [III], T-2RT.....                                           | S-75  |
| Table S-23: Strawberry, Screen [IV], T-2RT.....                                            | S-78  |
| Table S-24: Strawberry, Screen [V], T-2RT.....                                             | S-83  |
| Table S-25: Strawberry, Screen [VI], T-2RT.....                                            | S-87  |
| Table S-26: Strawberry, Screen [VII], T-2RT .....                                          | S-91  |
| Table S-27: Strawberry, Screen [VIII], T-2RT .....                                         | S-93  |
| Table S-28: Strawberry, Screen [IX], T-2RT.....                                            | S-97  |
| Table S-29: Strawberry, Screen [X], T-2RT .....                                            | S-99  |
| Table S-30: Strawberry, Screen [XI], T-2RT.....                                            | S-100 |

|                                                                        |       |
|------------------------------------------------------------------------|-------|
| Table S-31: Strawberry, Summary of Screens [I-XI], T-3RT.....          | S-102 |
| Table S-32: Referenced Annotated Ellagitannins .....                   | S-103 |
| Table S-33: Screen [IV], T-2RT Comparison Match Strawberry Leaves..... | S-107 |
| Table S-34: Screen [IV], T-2RT Comparison Match Any Source.....        | S-110 |
| References:.....                                                       | S-119 |

## Experimental

### Strawberry leaf extraction

Initially 500  $\mu\text{L}$  of methanol was added to the provided dried extracts of each species after which 5  $\mu\text{L}$  of these were diluted with methanol to a final volume of 500  $\mu\text{L}$  to create final concentrations of 250  $\mu\text{M}$ . Harvested strawberry (*Fragaria ananassa* cv. Albion) and Palmer amaranth (*Amaranthus palmeri*) leaf tissues were initially stored at  $-80^{\circ}\text{C}$  for 18 hours after which a mortar and pestle was utilized to finely powder them with dry ice. The mixture was stored at  $-20^{\circ}\text{C}$  for 24 hours to allow for complete sublimation before weighing out 100 mg into 1 mL of methanol. Homogenization by sonication was then performed by utilizing two cycles of 40s at 50% amplitude followed by 20s in an ice bath for a total of two minutes per sample. Samples were subsequently vortexed and then centrifuged at 1048g for 10 min at  $25^{\circ}\text{C}$  after which 0.5 mL of supernatant was transferred to new precooled microfuge tubes. Then 0.25 mL of water and 0.25 mL of chloroform were added followed by 20 inversions before subsequent centrifugation at 1048g for 10 min at  $25^{\circ}\text{C}$ . Approximately 0.1 mL of the aqueous-methanol phase was transferred to LC-MS vials for analysis. Ellagitannins pose no known health hazard and do not require specialized handling procedures.

### Infusion MS/MS analysis

Ellagitannin standards were examined by direct infusion utilizing a flow rate of 5  $\mu\text{L}$  to 10  $\mu\text{L}$  per minute. The mass spectrometer was operated in negative ionization mode. The interface conditions were as follows: emitter voltage,  $-2600\text{V}$ ; vaporizer temperature,  $30^{\circ}\text{C}$ ; ion transfer tube,  $275^{\circ}\text{C}$ ; sheath gas, 12 (arb); aux gas, 5 (arb); and sweep gas, 0 (arb). Internal mass spectrometer settings utilized were as follows: RF lens, 60%; AGC target,  $4e5$ ; maximum injection time, 50 ms; and quadrupole isolation width, 2  $m/z$ . HCD and CID energies were applied as described in corresponding figures and tables. Mass ranges selected for MS/MS were: roburin E, grandinin, castalagin, and vescalagin, (150-1200  $m/z$ ); acutissimin A and epiacutissimin A, (150-1250  $m/z$ ); roburin A, roburin D, and roburin B/C, (200-2000  $m/z$ ).

## Data Analysis

### Software

Data analysis was performed with Freestyle visualization software 1.1.175.0 (Thermo Scientific), Proteome Discoverer 2.1.0.81 (Thermo Scientific), ActivePerl-5.24.1.2402-MSWin32-x64-401627 (ActiveState Inc., Vancouver, BC, CA), and Microsoft Excel Office 365 (Microsoft Corp., Redmond, WA, USA). Freestyle display options for chromatograms were set to centroid and scan filters were manually selected from the filter dropdown menu. Specific workflows for Proteome Discoverer and Perl are provided in the following sections. Mass Spectra were annotated with Microsoft Powerpoint Office 365 (Microsoft Corp.) and chemical structures were created in Biovia Draw 2017 v17.1 (Dassault Systemes, BIOVIA Corp., San Diego, CA) and ChemDraw 2017 v17.0.0.206 (PerkinElmer Informatics, Inc., Waltham, MA).

### Proteome Discoverer workflow

The workflow tree for Proteome Discoverer to process (\*.raw) files consisted of four serial nodes: Spectrum Files, [Node\_0]; Spectrum Selector, [Node\_1]; Scan Event Filter, [Node\_2]; Spectrum Grouper, [Node\_3]. After Spectrum Grouper two Scan Event Filters were employed in parallel, [Node\_6] and [Node\_4], each of which had a Spectrum Exporter connected in series, [Node\_7] and [Node\_5] respectively. Specific settings for nodes used were as follows unless stated otherwise: [Node\_1] – 1. General Settings: Use MS<sup>1</sup> Precursor Selection, 2. Spectrum Properties Filter: Min. Precursor Mass = 150 Da, Max Precursor Mass = 2400 Da, Minimum Peak Count = 1, all other values = 0, 3. Scan Event Filters: Mass Analyzer = (Not Specified), MS Order = Any, Activation Type = Any, Min. Collision Energy = 0, Max Collision Energy = 1000, Scan Type = Is Full, Polarity Mode = (Not Specified), 4. Peak Filters: S/N Threshold (FT-Only) = 0, 5. Replacements for Unrecognized Properties: U. Charge R. = Automatic, U. Mass Analyzer R. = FTMS, U. MS Order R. = MS<sup>2</sup>, U. Activation Type R. = CID, U. Polarity R. = -, U. MS Resolution @ 200 R. = 50000, U. MS<sup>n</sup> Resolution @ 200 R. = 15000. [Node\_2] – 1. Filter Settings: Mass Analyzer = (Not Specified), MS Order = Is MS<sup>2</sup>, Activation Type = Any, Min. Collision Energy = 0, Max Collision Energy = 1000, Scan Type = (Not Specified), Polarity

Mode = (Not Specified). [Node\_3] – 1. Spectrum Match Criteria: Precursor Match Criterion = Same Measured Mass-to-Charge, Precursor Mass Tolerance = 10 ppm, Max. RT Difference [min] = 13, Allow Mass Analyzer Mismatch = False, Allow MS Order Mismatch = False. [Node\_4] – 1. Filter Settings: Mass Analyzer = (Not Specified), MS Order = Is MS<sup>2</sup>, Activation Type = Is HCD, Min. Collision Energy = 0, Max Collision Energy = 1000, Scan Type = (Not Specified), Polarity Mode = (Not Specified). [Node\_5] – 1. Output Data: File Name = (no entry), File Name Suffix = HCD, Export Format = Mascot Generic Format (\*.mgf). [Node\_6] – 1. Filter Settings: Mass Analyzer = (Not Specified), MS Order = Is MS<sup>2</sup>, Activation Type = Is CID, Min. Collision Energy = 0, Max Collision Energy = 1000, Scan Type = (Not Specified), Polarity Mode = (Not Specified). [Node\_7] – 1. Output Data: File Name = (no entry), File Name Suffix = CID, Export Format = Mascot Generic Format (\*.mgf).

### **Perl and Excel workflow**

A perl script was written to process the (\*.mgf) files associated with [Node\_7] into corresponding (\*.csv) files. The output csv file contained columns: File = raw file name; Pepmass = precursor *m/z*; Intensity = NL; Charge = z; RT in seconds = time range precursors were observed; Scans = scan range precursors were observed. Output files in mgf format were placed in a common folder along with the mgf-to-csv.pl script within the path, (C:\Perl64\). Command line execution from within the common folder to create csv files used the specific syntax: perl mgf-to-csv.pl input\_filename.mgf output\_filename.csv. Output csv files were converted to full Excel workbooks in xlsx format. The MAX, COUNTIF, and COUNTIFS functions were then used to generate summary values in each excel file.



## Results and Discussion

### Analyzer Optimization

#### Mass Range, MIPS, Intensity, and Z Filters

The mass range was set from 150  $m/z$  to 1200  $m/z$  for mass spectra as standards eluted primarily as  $[M-2H]^{2-}$  ions, but a dynamic software adjustment was allowed for both HCD and CID spectra. This allowed for monitoring of any incidental in-source fragmentation that may produce 249 / 275 / 301 reporter ions as an indicator of problems in precursor ion transmission. The lower value of 150  $m/z$  was chosen to ensure sugars such as glucose could be observed but high abundance solvent ions would not adversely affect ion accumulation of analyte ions due to the AGC applied to the FT analyzer. The upper range of 1200  $m/z$  was selected to balance minimizing total scanning time to enable more data points to be collected while still allowing for observation of multiply charged ellagitannins. Larger standards formed multiply charged species preferentially and it seemed reasonable to expect increasing charge states with ellagitannin size so 1200  $m/z$  was selected to allow for the observation of more ellagitannins for this pilot study. The heated capillary reduced the transmission of non-covalent multimers (i.e. dimers, etc.) and additional in source fragmentation was not required for standard compounds. Isotopes of precursors were excluded by applying the peptide setting of the monoisotopic peak selection (MIPS) filter. An intensity filter was used to discriminate initial precursor ions with values of 1e5 and 5e5 chosen for comparison. Inclusion of a dianion charge state filter was implemented for standard analysis.

#### HCD Dependent Scans, DE, and Apex Detection

The number of data dependent HCD scans was set to 5. This value ensured that all eligible precursors could also be subjected to CID. Values higher than 5 resulted in HCD being prioritized over CID with fewer eligible precursors being subjected to CID before the next MS scan. An optional dynamic exclusion (DE) filter was considered. The apexes of the closest resolved standard isomers were roughly 24s apart and half that value was initially selected as an exclusion window. Species with narrow elution profiles widths of

approximately 6s observed in strawberry motivated the inclusion of a 3s exclusion window in later filter iterations. Dynamic exclusion only impacted the number of data points acquired for standard compounds and was not explicitly discussed. Apex detection was included for one DE method for comparison.

### **MS Analyzer: Resolution and Injection Time**

Analyzer conditions for initial MS spectra were varied by Orbitrap resolution (at  $m/z$  200) and maximum injection times to determine the impact on the number of CID spectra that could be acquired. Discrete CID data points of the  $[M-2H]^{2-}$  ion for 40 ng of each ellagitannin acquired with a maximum injection time of 50 ms or 25 ms at an Orbitrap resolution of 50K, 30K, and 15K appear in [Figures S-11 to S-13](#) and [Figures S-14 to S-16](#) respectively. Given the transient lengths for 50K, 30K, and 15K were 96 ms, 64 ms, and 32 ms it was unsurprising that there were generally a few more data points at lower resolution settings at either maximum injection time. Since resolution settings of 500K, 240K, and 120K with their substantially longer transients of 1024 ms, 512 ms, and 256 ms were not utilized, the MS resolution setting chosen had less effect on the number of CID data points acquired. A 50K resolution with a 50 ms maximum ion accumulation was selected. Inspection of precursor scans from strawberry suggested that higher resolutions than this may be beneficial for some low abundance ellagitannins with narrow elution profiles but resolution settings of 30K or 15K also provided equivalent screening performance under most conditions.

### **CID Analyzer: OT vs IT, Resolution and Injection Time**

Analyzer conditions for CID spectra were varied by analyzer and automatic gain control (AGC) values to determine the impact on the number of CID spectra that could be acquired in addition to spectra quality. Discrete CID data points of the  $[M-2H]^{2-}$  ion for 40 ng of each ellagitannin acquired using an AGC Target of 5e4 or 1e4 at an Orbitrap resolution of 50K, 30K, and 15K appear in [Figures S-17 to S-19](#) and [Figures S-20 to S-22](#) respectively. Similar data acquired with an AGC value of 1e4 at Ion Trap scan rates of Normal, Rapid, and Turbo are shown in [Figures S-23 to S-25](#). It was observed that the default 5e4 AGC settings with 15K resolution for Orbitrap CID spectra was comparable in

terms of number of data points generated for isomer differentiation but superior in mass accuracy as well as resolution over the Ion Trap. This difference in mass accuracy between spectra generated by the Orbitrap and Ion Trap was apparent even for castalagin which had the widest elution profile and the most number of data points for averaging as shown in [Figure S-26](#). Lowering the number of target ions by reducing the AGC setting to 1e4 on the Orbitrap did increase the number of CID data points but also slightly reduced the relative intensity lower abundance fragments. The Thermo default of 5e4 for 15K Orbitrap CID scans was retained to ensure the abundance of low intensity fragment ions was not reduced for marginal method time improvement.

## Mass Trigger Validation

### Control Experiments

The functionality of the conditional TRT used to initiate acquisition of CID data was first evaluated by estimating a practical lower bound for ellagitannin injections. The CID extracted ion chromatograms (EICs) of 40 ng to 1.25 ng injections ([Figure S-27](#)) indicated that either 5 ng or 2.5 ng might be the minimum amount of an ellagitannin required. Closer inspection of the discrete CID data points generated for 5 ng, 2.5 ng, and 1.25 ng injections ([Figure S-28 to S-30](#)) showed that all ellagitannin standards maintained similar numbers of data points through 1.25 ng but shoulder truncation became more pronounced below 2.5 ng. This implied that 2.5 ng would be the minimum amount required to ensure limited truncation for species classified as ellagitannins. Caution must be advised when selecting CID data points for averaging given that close eluting isomers may or may not have data points between the apexes ([Figure S-31](#)) that have non-trivial contributions from each isomer.

To examine the specificity of TRT amaranth was selected as a test matrix as it contained no ellagitannin or HHDP derivatives that should result in classification of any precursor as an ellagitannin. TRT conditions were examined to compare the differences of requiring all three reporter ions in T-3RT and variants that allowed any two reporter ions (T-2RT) or any reporter ion (T-1RT) to be observed in the top 10 most abundant peaks in an HCD spectrum to result in CID acquisition. A 10 µg/mL sample of mixed standard

ellagitannins, 100 mg/mL of amaranth, and a mixed sample of standard ellagitannins and amaranth at the same final concentrations were prepared. Each ellagitannin standard was correctly screened (Figures S-32 to S-34) and subjected to CID in both the ellagitannin and mixed amaranth / ellagitannin samples under all TRT conditions. The slight improvement observed for standards present in the mixture could either be resultant from more complete desorption from the column or greater ion transmission efficiency through the heated capillary. Repeating this experiment on a mass spectrometer without a capillary interface could readily exclude the latter possibility. A full critique of the quantitative limitations of the tandem HCD-CID screen on the Fusion platform was beyond the scope of this work.

The charge state filter was then modified to allow precursor candidates present in amaranth that were anions, dianions, or both anions and dianions to be eligible for HCD to allow for the possibility of incorrectly classified precursors. Inspection of the resultant MS, HCD, and CID chromatograms showed that no precursors were incorrectly classified as ellagitannins and subjected to CID in amaranth when a T-3RT (Figure S-35) or T-2RT (Figure S-36) was employed. Two false positive classifications were observed for T-1RT conditions (Figure S-37) which resulted in the acquisition of CID data in the absence of ellagitannin content. Strawberry analysis omitted T-1RT analysis given the false positives observed in amaranth.

## Filter Optimization

### Proteome Discoverer, Isobaric Grouping Parameters

In brief, the [Node\_1] peak filters S/N threshold value resulted in the exclusion of species with fewer data points in methods that utilized dynamic exclusion and zero was chosen so no species classified as ellagitannins would be omitted when the Proteome Discoverer workflow was used that would be manually included if Freestyle was employed. In [Node\_3] both the precursor mass tolerance and maximum RT difference were significant parameters. A precursor mass tolerance of 10 ppm was chosen to ensure that precursors +/- 5 ppm would be grouped and an RT value of 13 minutes was chosen to ensure a single  $m/z$  value would group all potential isomers. Although smaller RT values of 1.5 min, 1.0 min, 0.5 min, 0.13 min, and 0.05 min were examined, Proteome Discoverer

was unable to correctly categorize isomers by expected RT widths as there was too much inherent variation between species. Additional post-analysis workflow that allows spectral library matching to enumerate and associate isomers with unique CID spectra was beyond the scope of this work.

### **Screen Selection Parameters**

Screen [I] provided information on the effectiveness of utilizing only an intensity filter and five data dependent HCD scans. Tannins had previously been reported as readily forming doubly charged anions via ESI and the elution mass spectra of standard ellagitannins (Figure S-8) supported that observation.<sup>1</sup> Screen [II] and [III] were applied to preferentially monitor low mass and high mass ellagitannins respectively. Allowing for both anions and dianions was no different than not having a charge state filter given the ionization constraints during elution and was not included. Condition [IV] was initially estimated from standard elution profiles but additional acquisition under [V] was performed to ensure later eluting species with potentially narrower elution profiles were not omitted. Apex detection was combined with DE in condition [VI] to determine if more low abundance species were classified with the addition of this feature. Combinations that included both charge state and DE filters were examined in [VII] and [VIII] to determine if any advantage in compound discovery was gained. Additional DE variants with higher precursor intensity filters were created in [IX], [X], and [XI] to allow for greater number of higher abundance species to be catalogued if present.

## Supplementary Figures

**Figure S-1: Molecular Structures, Ellagitannin Standards**

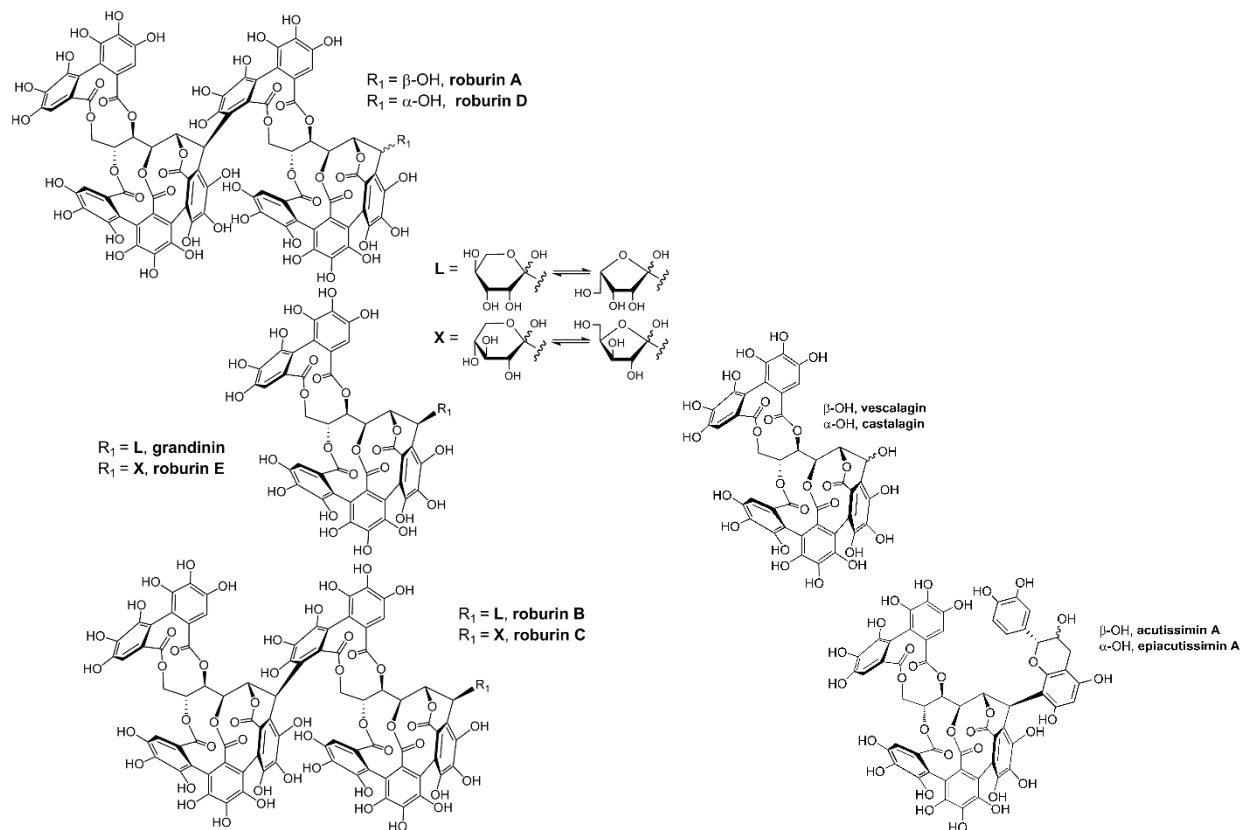

**Figure S-1:** Molecular structures of acutissimin A, epiacutissimin A, roburin A, grandinin, roburin E, roburin D, roburin B/C, vescalagin, and castalagin.

## Figure S-2: CID, Higher Charge States, MS<sup>2</sup>

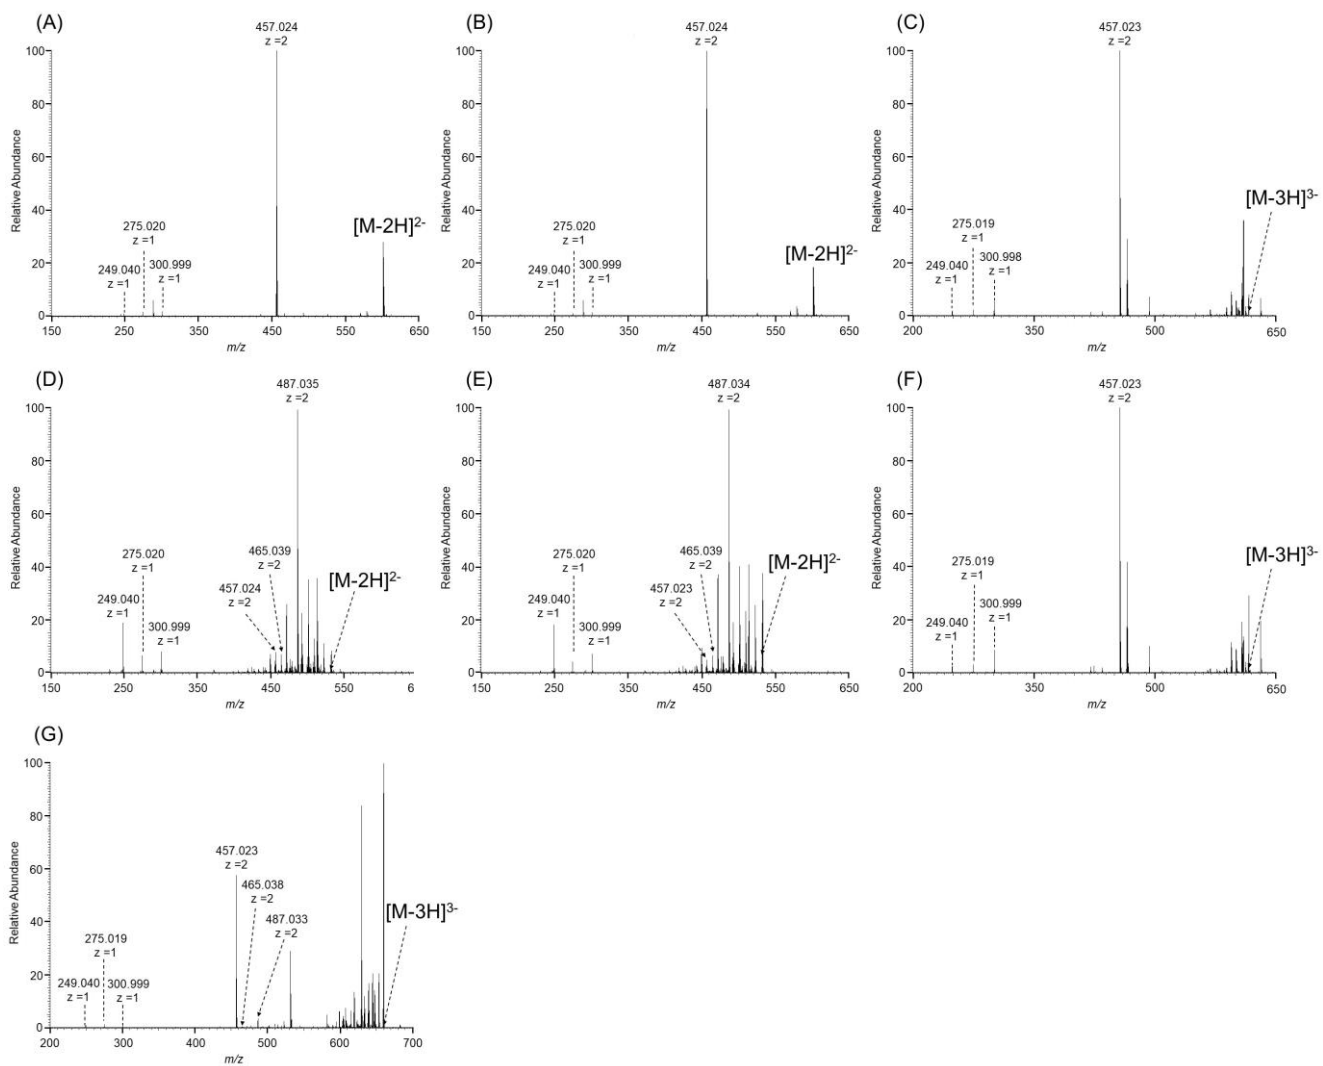

Figure S-2: CID spectra of: (A) acutissimin A [M-2H]<sup>2-</sup>, (B) epiacutissimin A [M-2H]<sup>2-</sup>, (C) roburin A [M-3H]<sup>3-</sup>, (D) grandinin [M-2H]<sup>2-</sup>, (E) roburin E [M-2H]<sup>2-</sup>, (F) roburin D [M-3H]<sup>3-</sup>, (G) roburin B/C [M-3H]<sup>3-</sup>.

**Figure S-3: CID 457, MS<sup>3</sup>**

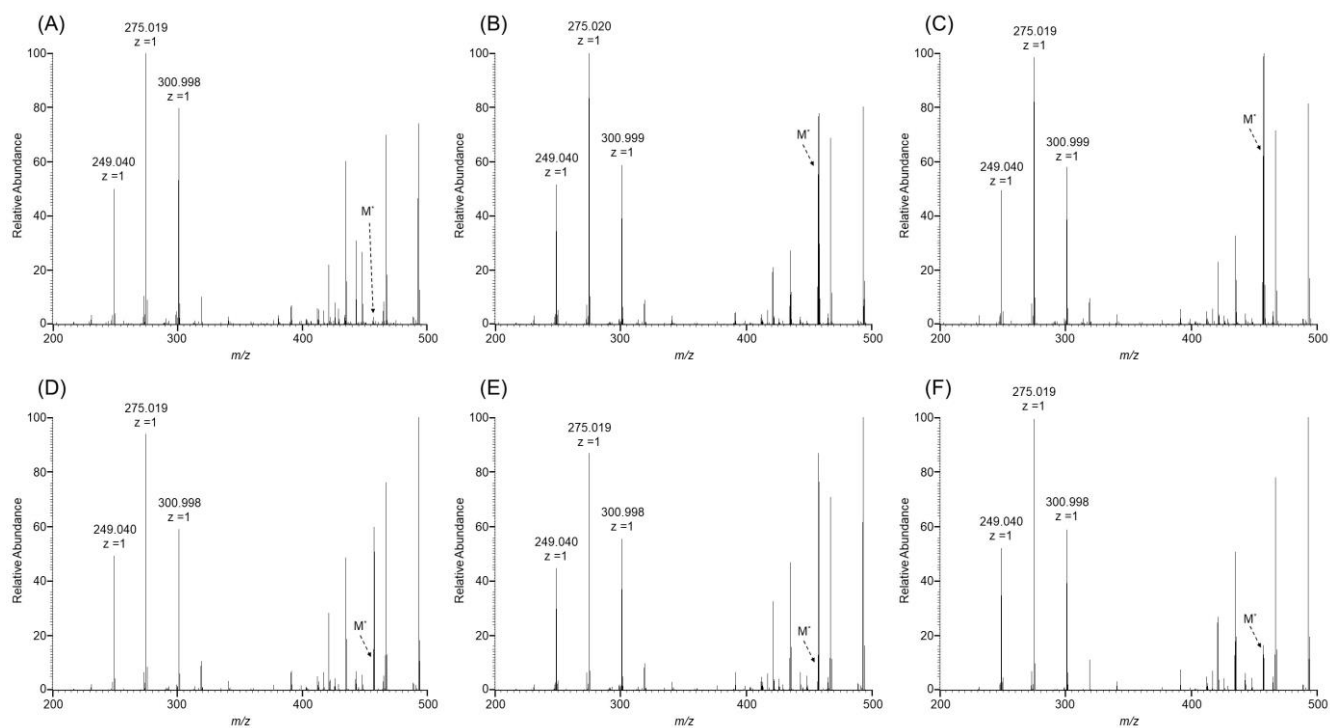

**Figure S-3:** CID spectra of the isolated 457 species derived from the collision-induced dissociation of: (A) castalagin  $[M-2H]^{2-}$ , (B) acutissimin A  $[M-2H]^{2-}$ , (C) epicutissimin A  $[M-2H]^{2-}$ , (D) roburin A  $[M-3H]^{3-}$ , (E) roburin D  $[M-3H]^{3-}$ , (F) roburin B/C  $[M-3H]^{3-}$ . The corresponding spectra for Vescalagin appears in the main text and was not duplicated here.



**Figure S-4: CID 487 MS<sup>3</sup>, 465 MS<sup>4</sup>**

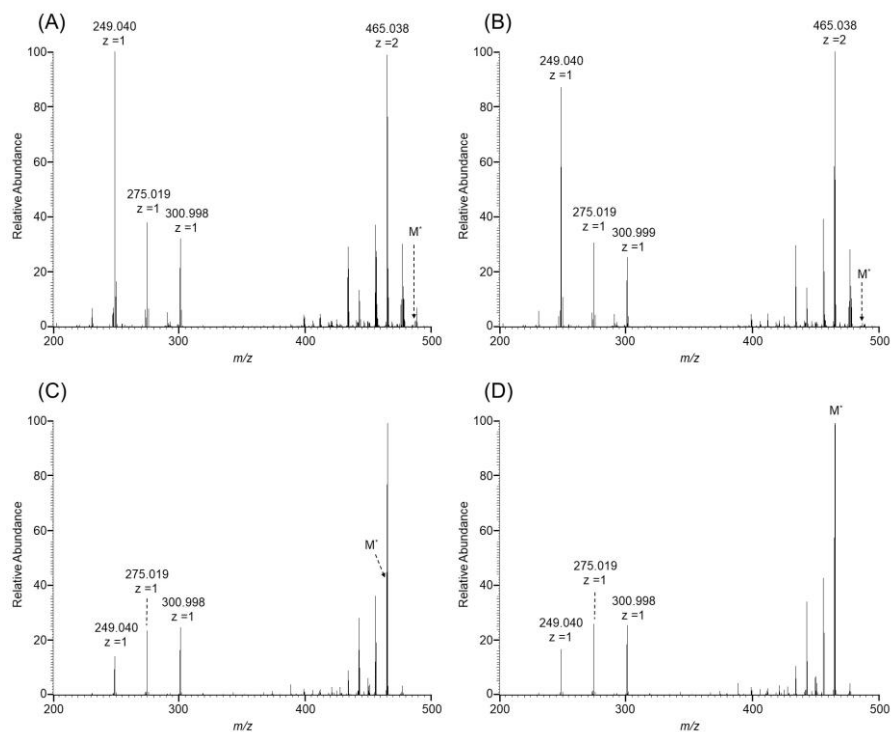

**Figure S-4: CID spectra of the isolated collision-induced dissociation of: (A) grandinin 487, MS<sup>3</sup>, (B) roburin E 487, MS<sup>3</sup>, (C) grandinin 465, MS<sup>4</sup>, (D) roburin E 465, MS<sup>4</sup>.**

**Figure S-5: CID, Lower Charge States, MS<sup>2</sup>**

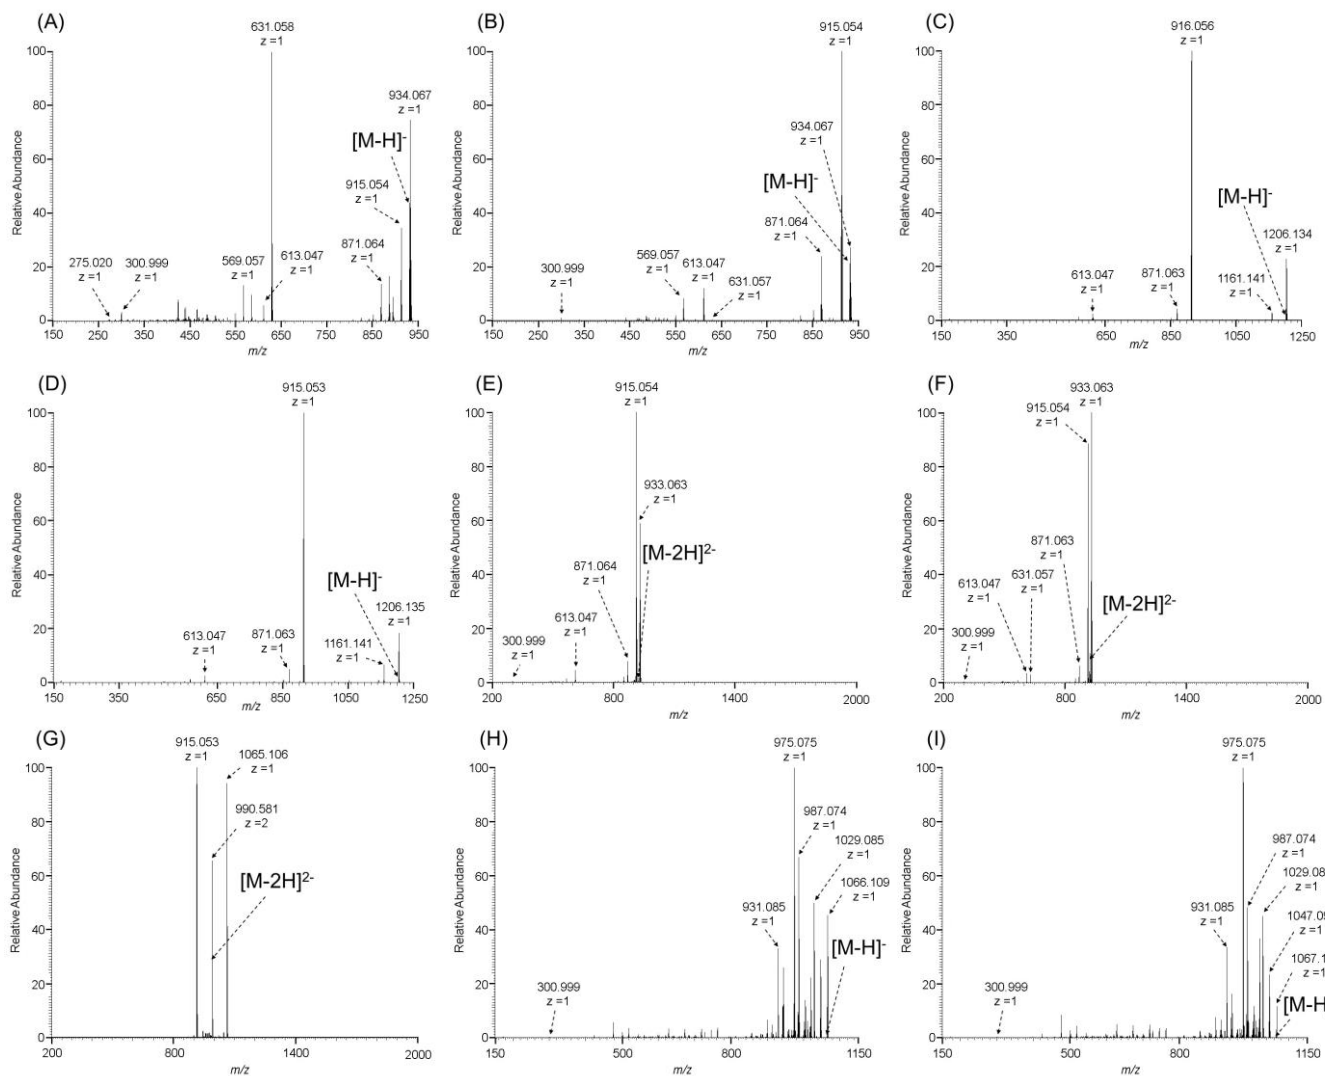

**Figure S-5:** CID spectra of: (A) castalagin [M-H]<sup>-</sup>, CE 25; (B) vescalagin [M-H]<sup>-</sup>, CE 24; (C) acutissimin A [M-H]<sup>-</sup>, CE 25; (D) epiacutissimin A [M-H]<sup>-</sup>, CE 25; (E) roburin A [M-2H]<sup>2-</sup>, CE 20; (F) roburin D [M-2H]<sup>2-</sup>, CE 18; (G) roburin B/C [M-2H]<sup>2-</sup>, CE 16; (H) grandinin [M-H]<sup>-</sup>, CE 25; (I) roburin E [M-H]<sup>-</sup>, CE 28.

**Figure S-6: Infusion MS**

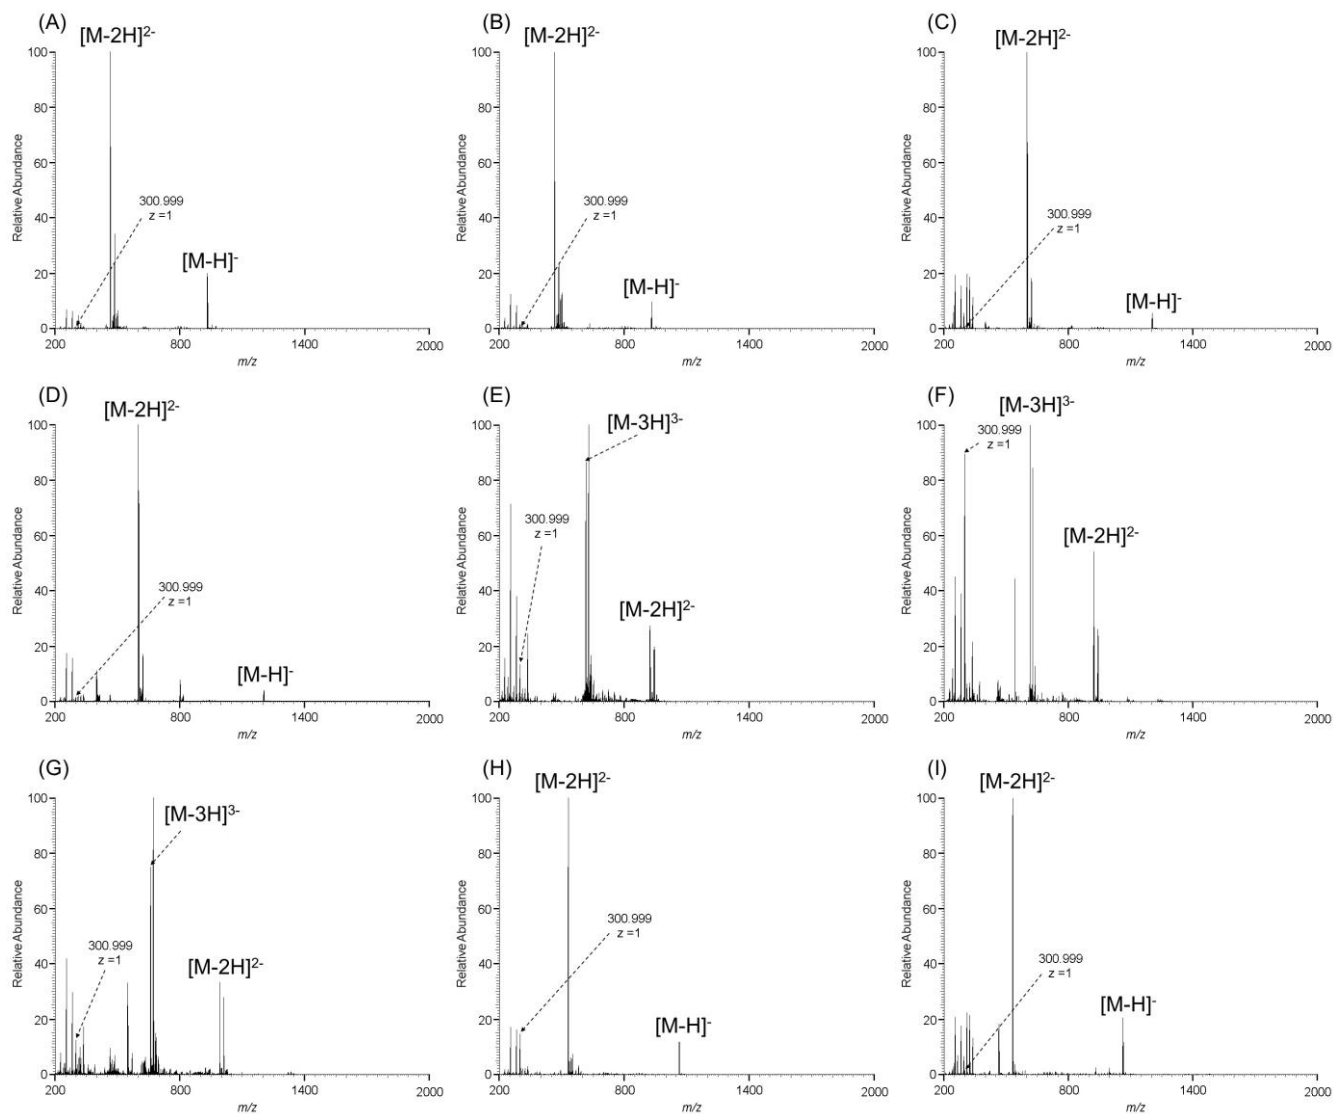

**Figure S-6: Infusion mass spectra of: (A) castalagin, (B) vescalagin, (C) acutissimin A, (D) epiacutissimin A, (E) roburin A, (F) roburin D, (G) roburin B/C, (H) grandinin, (I) roburin E.**

**Figure S-7: HCD Series,  $[M-2H]^{2-}$**

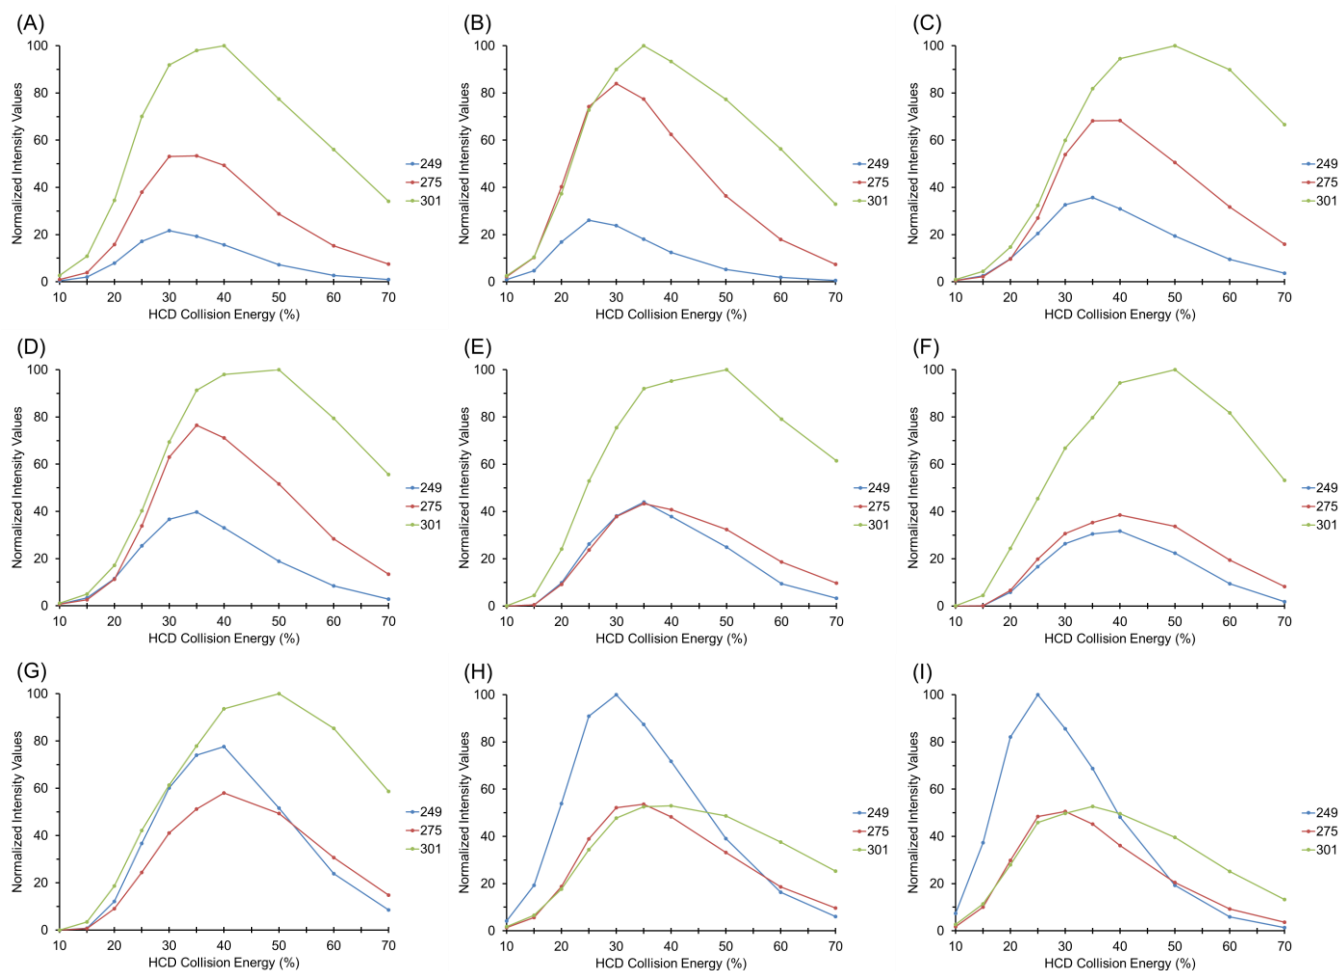

**Figure S-7:** Normalized abundance of (249, 275, 301) ions with HCD collision energy of: (A) castalagin  $[M-2H]^{2-}$ , (B) vescalagin  $[M-2H]^{2-}$ , (C) acutissimin A  $[M-2H]^{2-}$ , (D) epiacutissimin A  $[M-2H]^{2-}$ , (E) roburin A  $[M-2H]^{2-}$ , (F) roburin D  $[M-2H]^{2-}$ , (G) roburin B/C  $[M-2H]^{2-}$ , (H) grandinin  $[M-2H]^{2-}$ , (I) roburin E  $[M-2H]^{2-}$ .

## Figure S-8: Elution MS

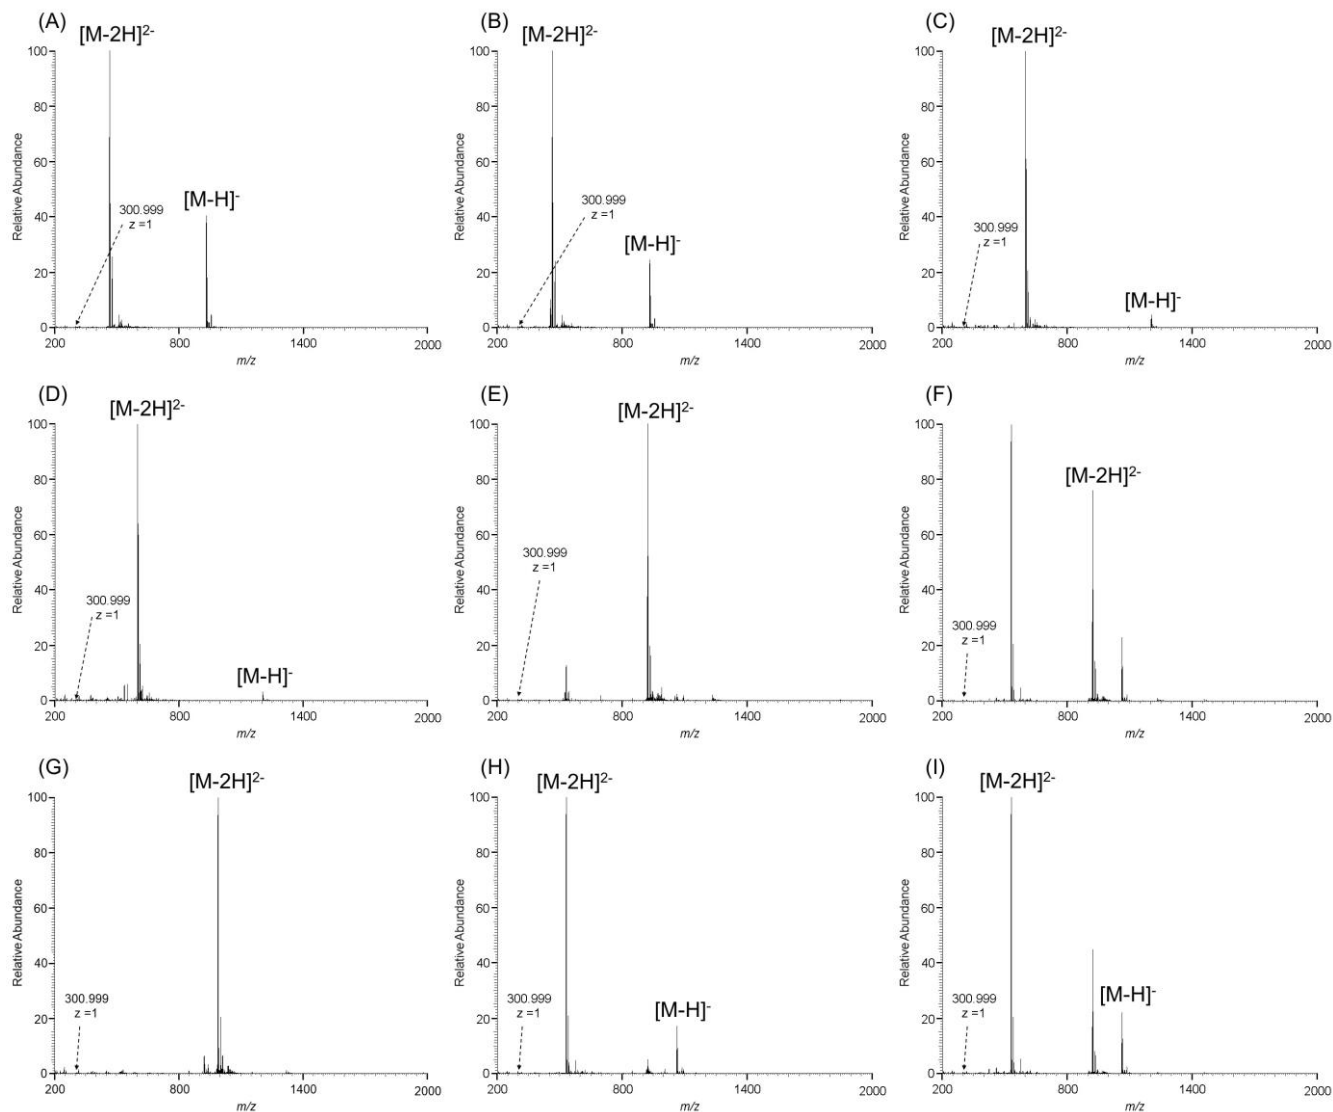

**Figure S-8:** Injection of a 20 ng standard mixture and resultant mass spectra acquired during the apex of the elution profile of: (A) castalagin (5.37-5.56 min), (B) vescalagin (3.70-3.93 min), (C) acutissimin A (7.15-7.30 min), (D) epiacutissimin A (8.88-8.95 min), (E) roburin A (2.73-2.89 min), (F) roburin D (3.06-3.20 min), (G) roburin B/C (2.48-2.74 min), (H) grandinin (2.88-3.03 min), (I) roburin E (3.11-3.33 min). The unlabeled significant peaks in (E), (F), (H), and (I) are resultant from the presence of coeluting standards.

### Figure S-9: HCD Series, [M-3H]<sup>3-</sup>

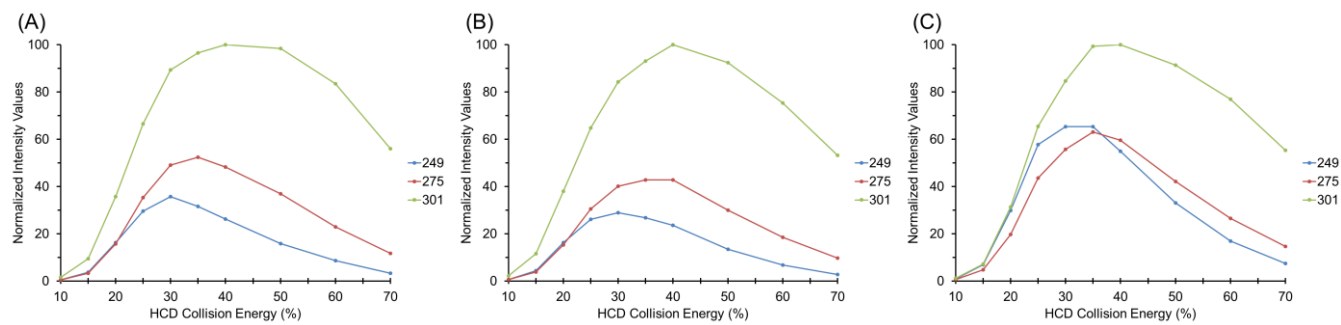

Figure S-9: Normalized abundance of (249, 275, 301) ions with HCD collision energy of: (A) roburin A [M-3H]<sup>3-</sup>, (B) roburin D [M-3H]<sup>3-</sup>, (C) roburin B/C [M-3H]<sup>3-</sup>.

**Figure S-10: MS<sup>2</sup> Spectra – CID 20 and HCD 20**

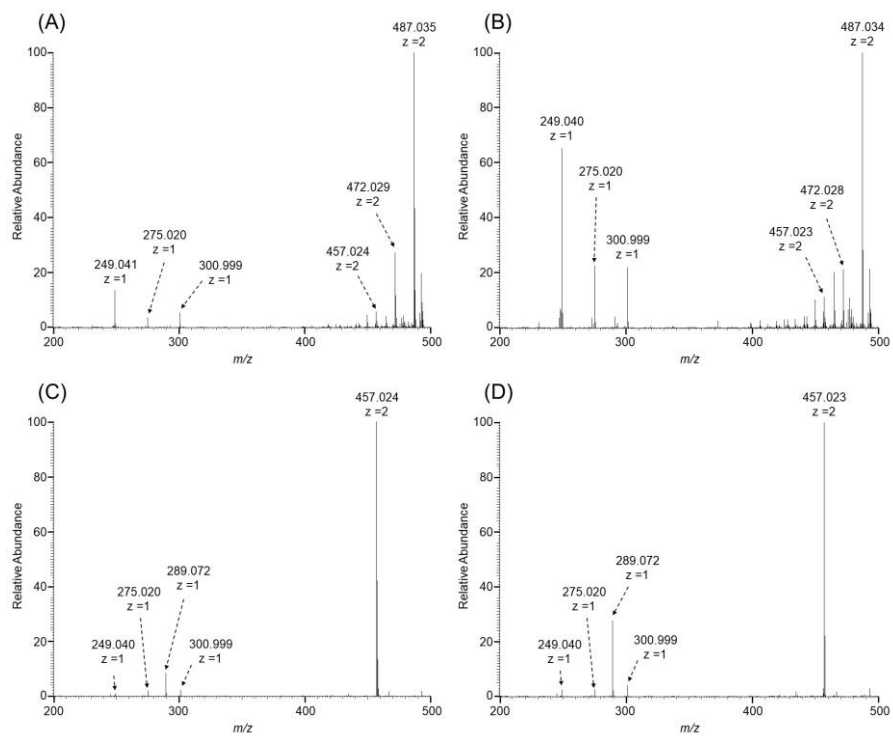

**Figure S-10:** MS<sup>2</sup> spectra for (A) grandinin CID 20, (B) grandinin HCD 20, (C) acutissimin A CID 20, (D) acutissimin A HCD 20.

**Figure S-11: CID Data Points – MS 50K, 50 ms**

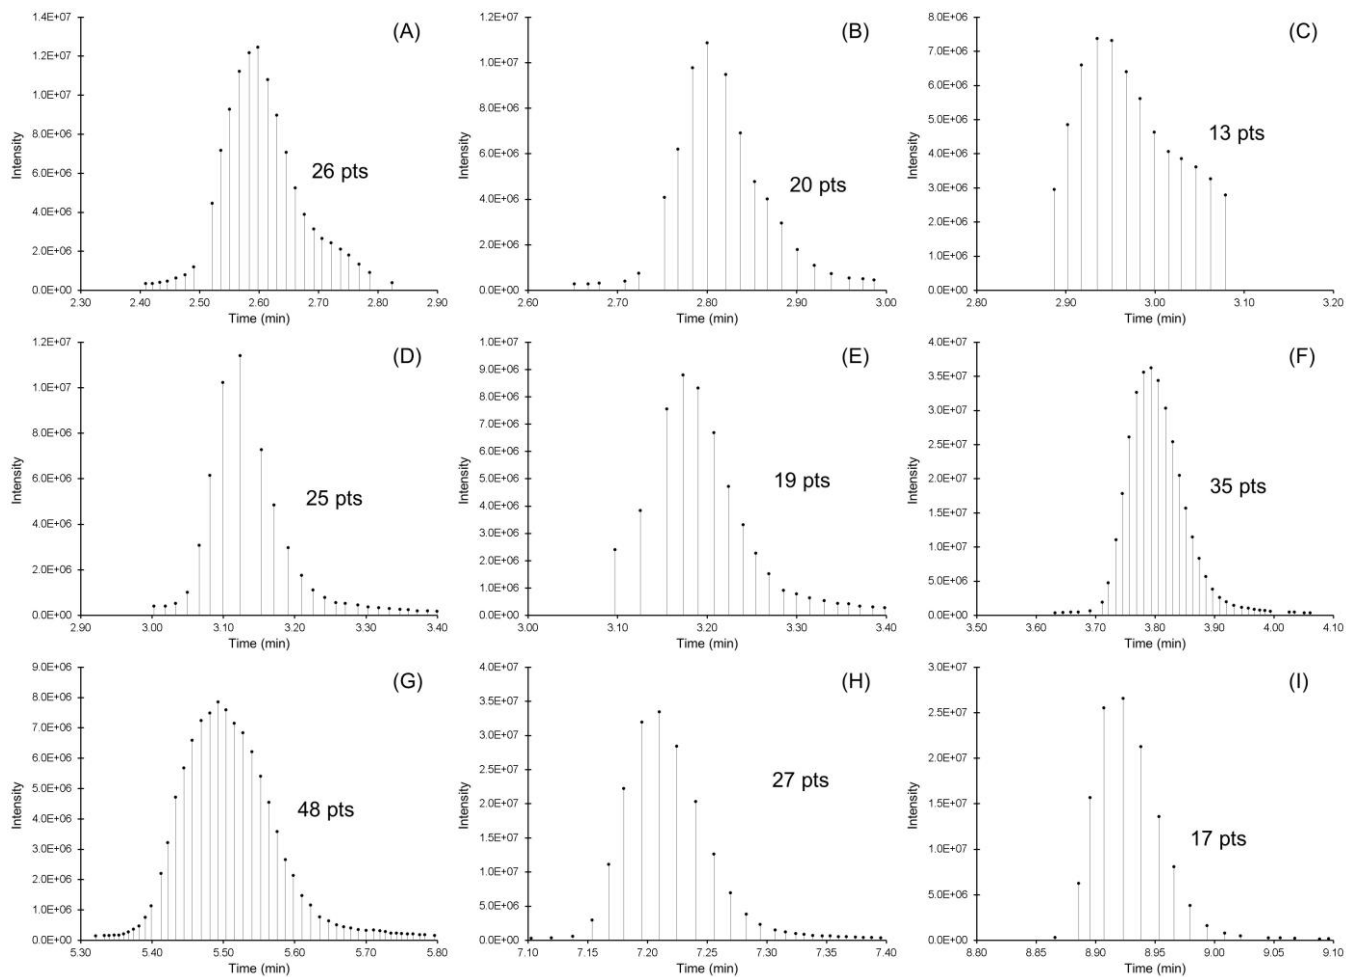

**Figure S-11:** Discrete CID data points of the  $[M-2H]^{2-}$  ion for 40 ng of each ellagitannin acquired with a dianion HCD-CID screen with a maximum injection time of 50 ms at an Orbitrap resolution of 50K for MS spectra: (A) roburin B/C, (B) roburin A, (C) grandinin, (D) roburin D, (E) roburin E, (F) vescalagin, (G) castalagin, (H) acutissimin A, (I) epiacutissimin A.



**Figure S-12: CID Data Points – MS 30K, 50 ms**

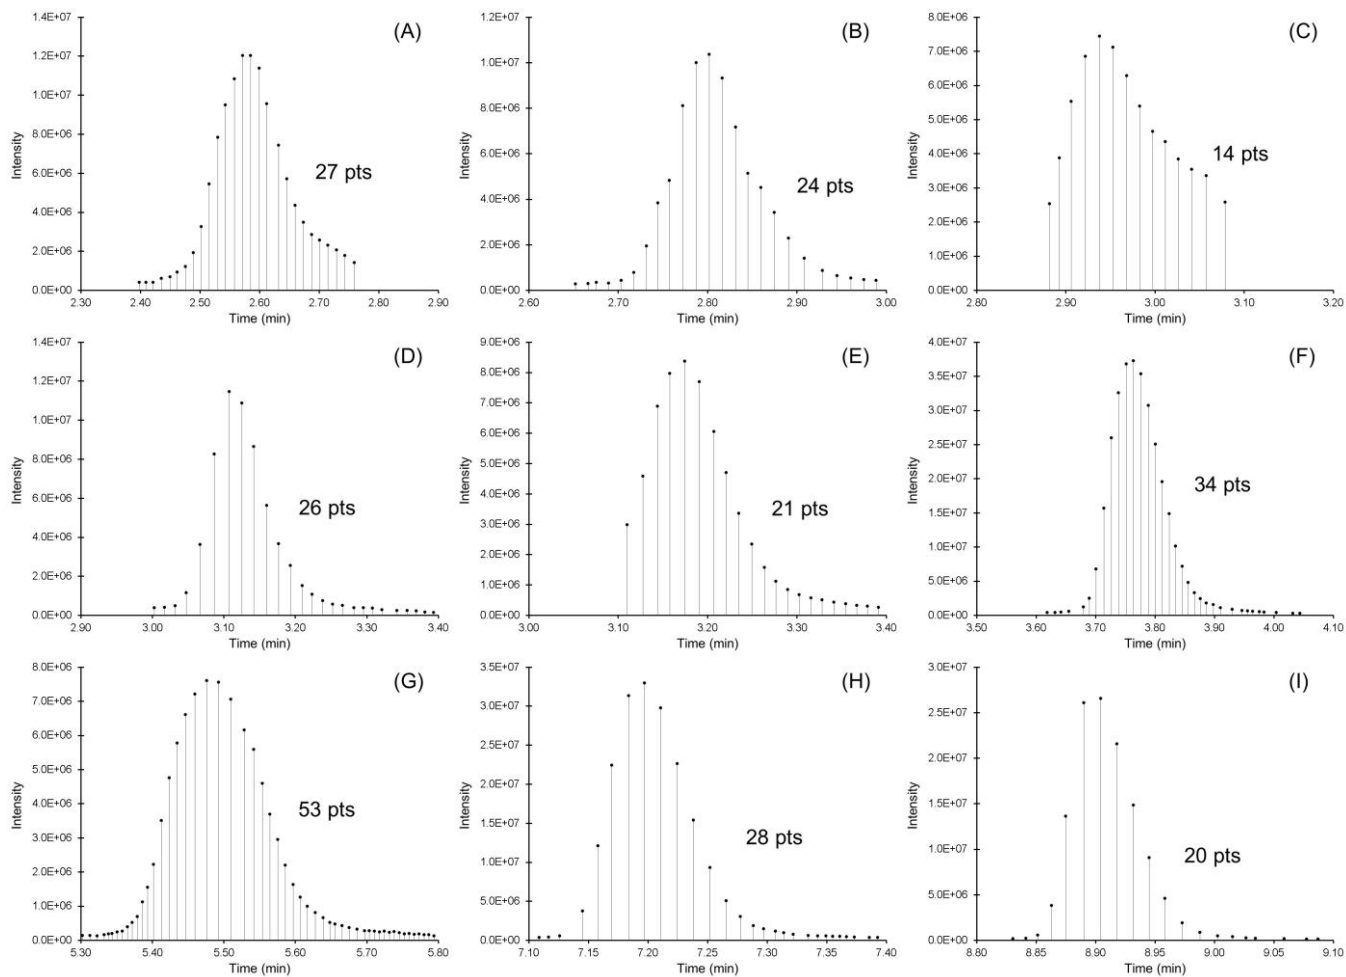

**Figure S-12:** Discrete CID data points of the  $[M-2H]^{2-}$  ion for 40 ng of each ellagitannin acquired with a dianion HCD-CID screen with a maximum injection time of 50 ms at an Orbitrap resolution of 30K for MS spectra: (A) roburin B/C, (B) roburin A, (C) grandinin, (D) roburin D, (E) roburin E, (F) vescalagin, (G) castalagin, (H) acutissimin A, (I) epiacutissimin A.

**Figure S-13: CID Data Points – MS 15K, 50 ms**

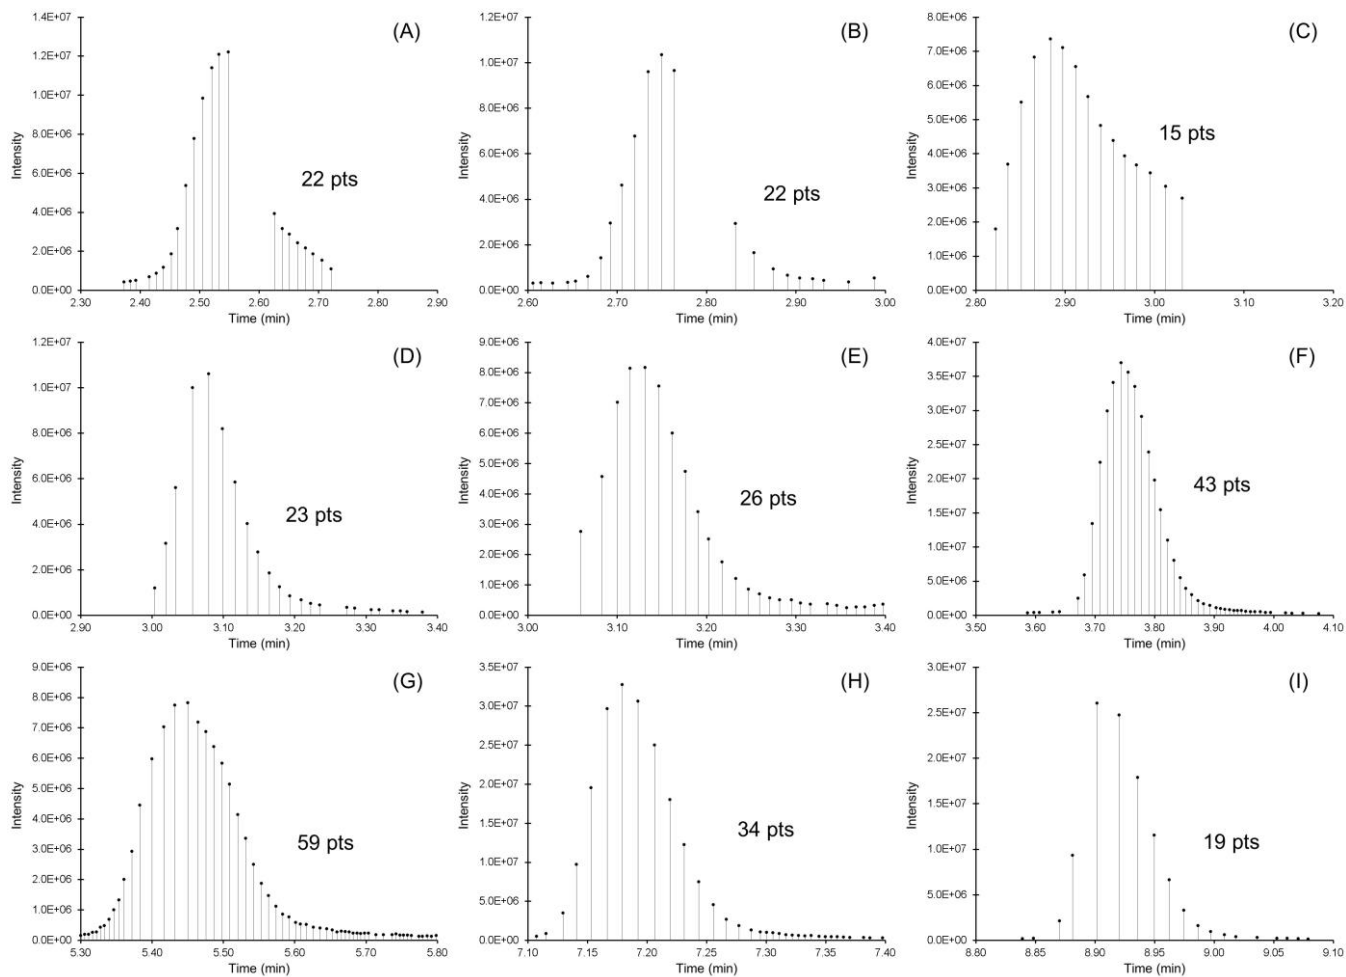

**Figure S-13:** Discrete CID data points of the  $[M-2H]^{2-}$  ion for 40 ng of each ellagitannin acquired with a dianion HCD-CID screen with a maximum injection time of 50 ms at an Orbitrap resolution of 15K for MS spectra: (A) roburin B/C, (B) roburin A, (C) grandinin, (D) roburin D, (E) roburin E, (F) vescalagin, (G) castalagin, (H) acutissimin A, (I) epiacutissimin A.

**Figure S-14: CID Data Points – MS 50K, 25 ms**

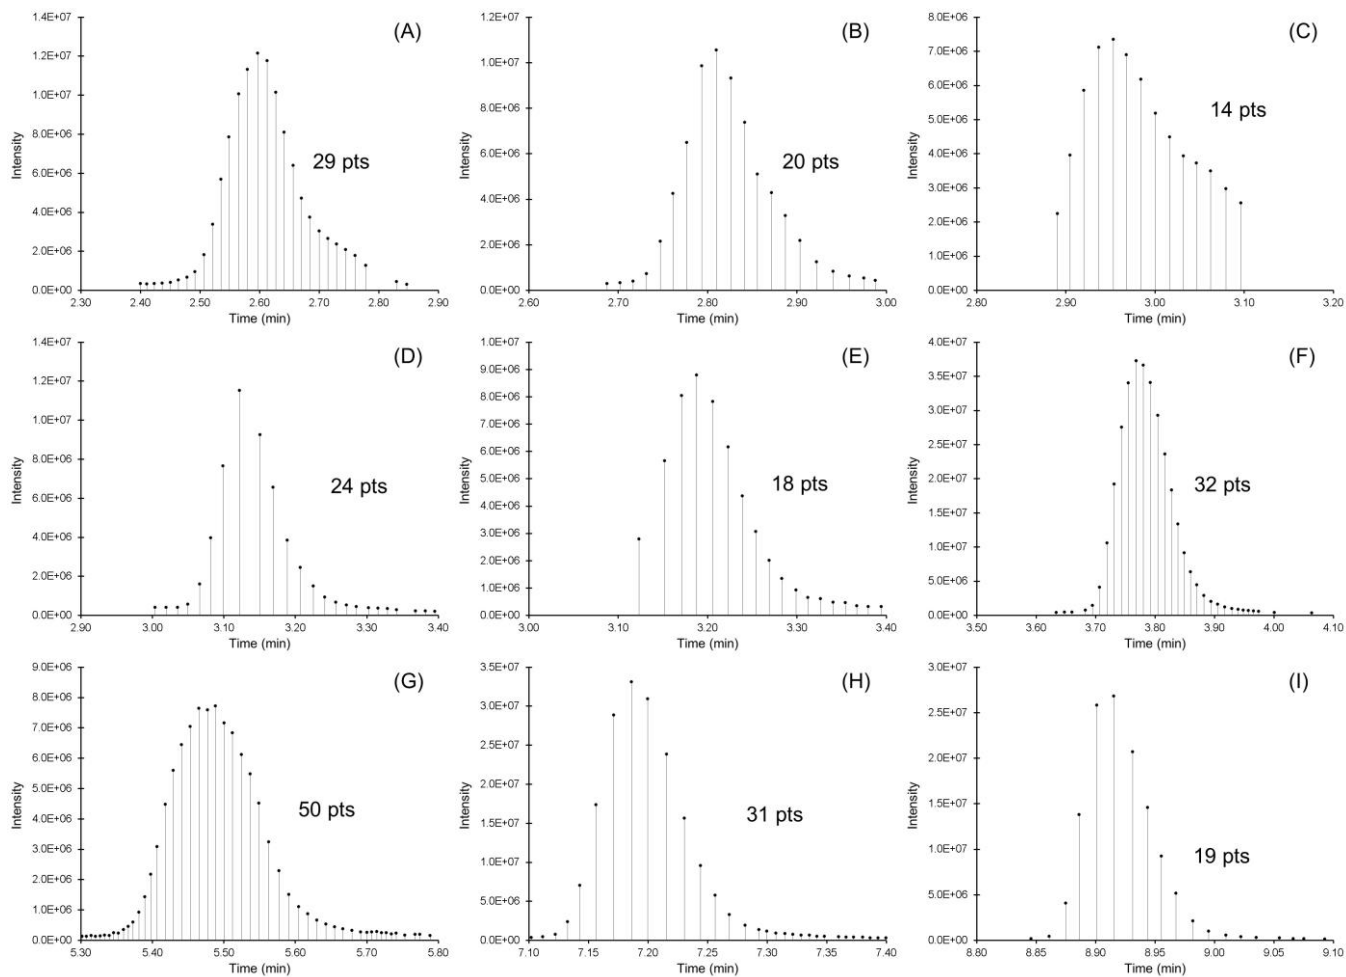

**Figure S-14:** Discrete CID data points of the  $[M-2H]^{2-}$  ion for 40 ng of each ellagitannin acquired with a dianion HCD-CID screen with a maximum injection time of 25 ms at an Orbitrap resolution of 50K for MS spectra: (A) roburin B/C, (B) roburin A, (C) grandinin, (D) roburin D, (E) roburin E, (F) vescalagin, (G) castalagin, (H) acutissimin A, (I) epiacutissimin A.

**Figure S-15: CID Data Points – MS 30K, 25 ms**

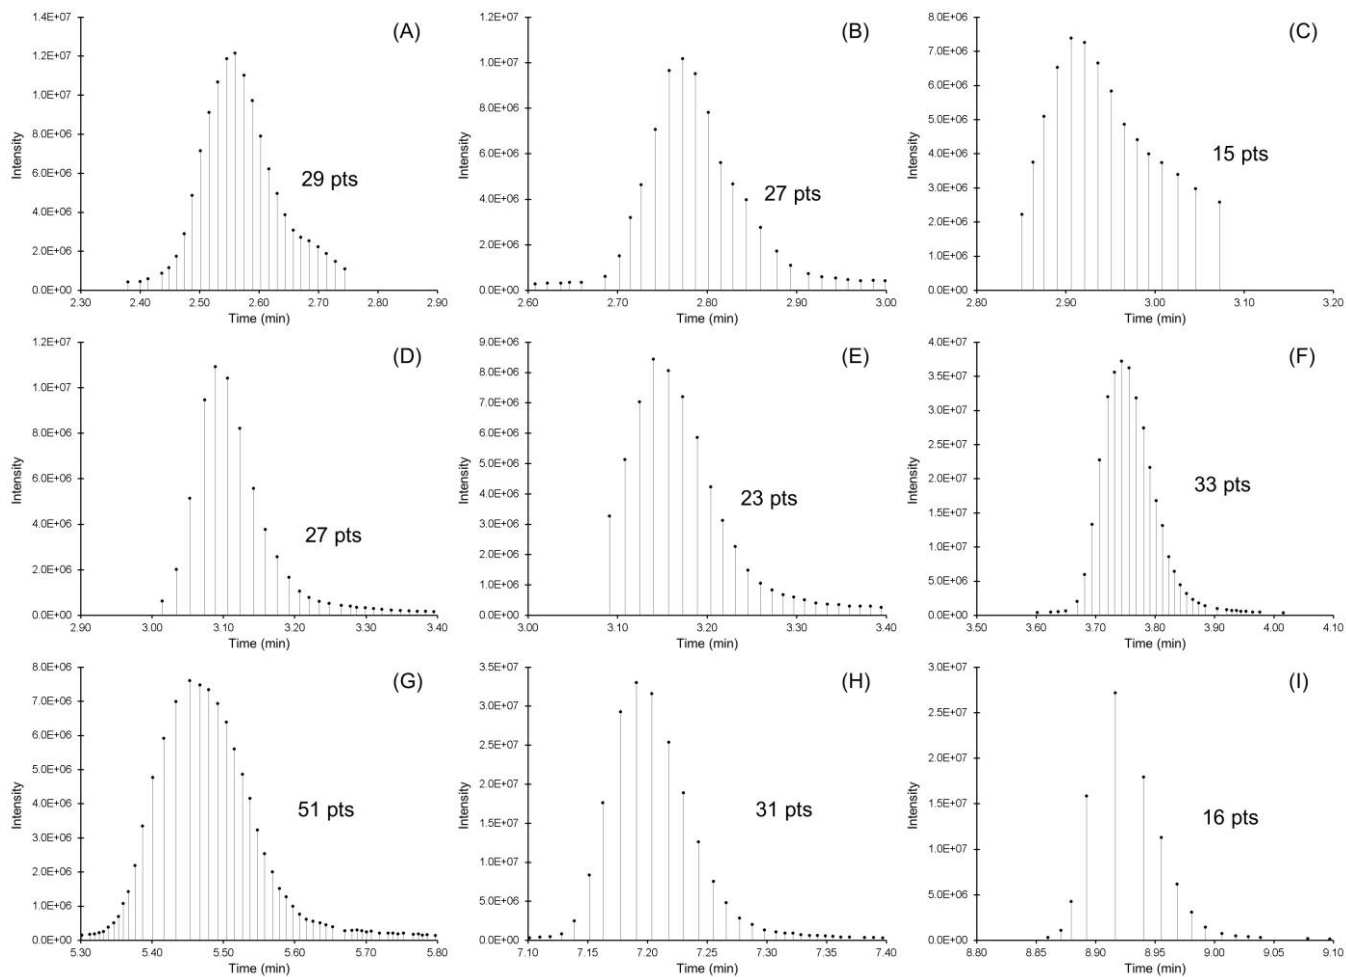

**Figure S-15:** Discrete CID data points of the  $[M-2H]^{2-}$  ion for 40 ng of each ellagitannin acquired with a dianion HCD-CID screen with a maximum injection time of 25 ms at an Orbitrap resolution of 30K for MS spectra: (A) roburin B/C, (B) roburin A, (C) grandinin, (D) roburin D, (E) roburin E, (F) vescalagin, (G) castalagin, (H) acutissimin A, (I) epiacutissimin A.

**Figure S-16: CID Data Points – MS 15K, 25 ms**

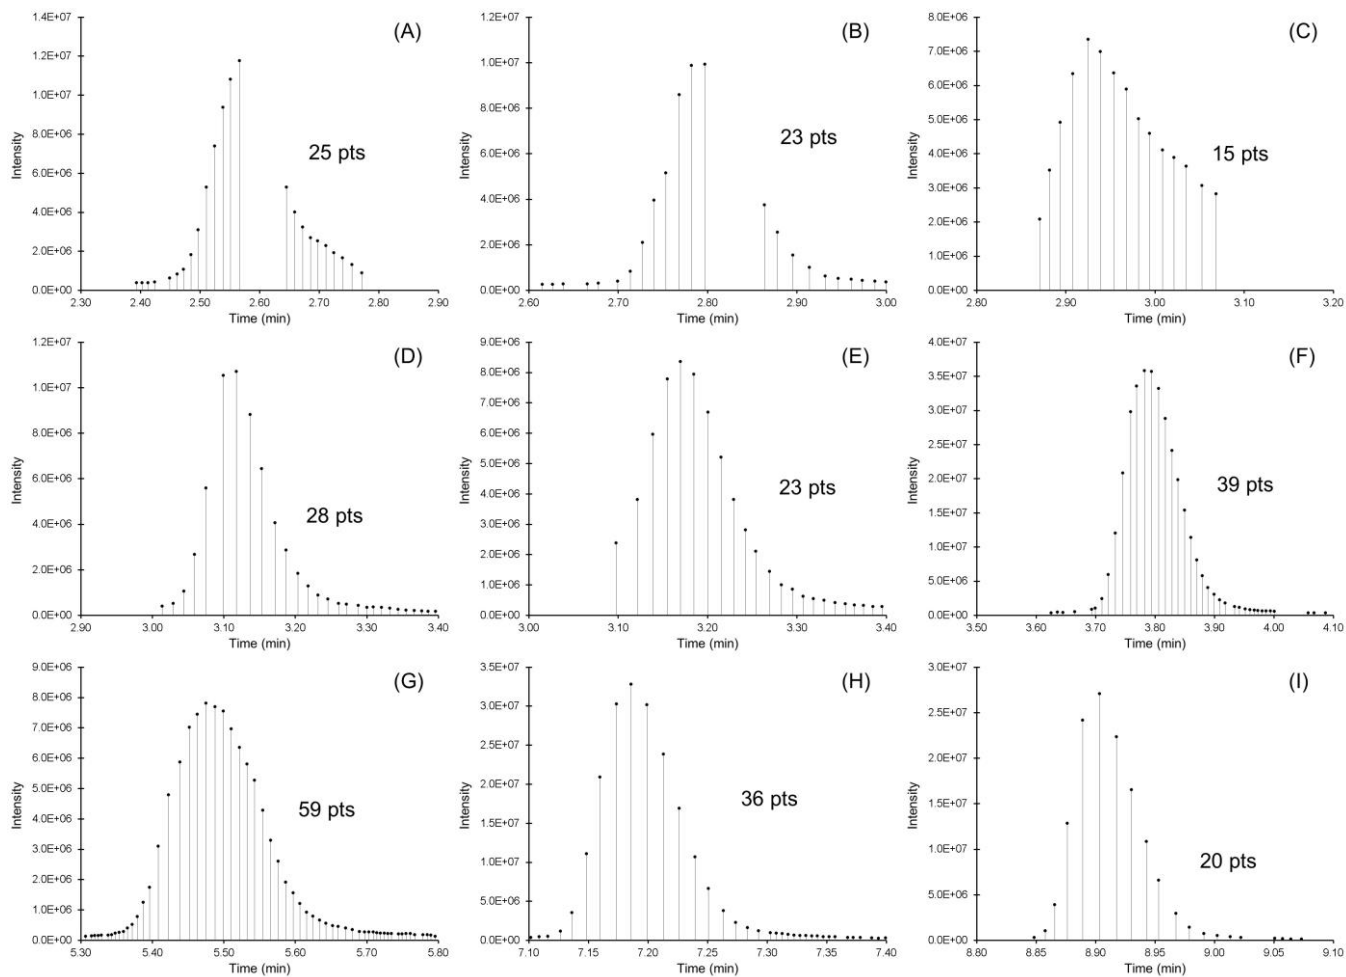

**Figure S-16:** Discrete CID data points of the  $[M-2H]^{2-}$  ion for 40 ng of each ellagitannin acquired with a dianion HCD-CID screen with a maximum injection time of 25 ms at an Orbitrap resolution of 15K for MS spectra: (A) roburin B/C, (B) roburin A, (C) grandinin, (D) roburin D, (E) roburin E, (F) vescalagin, (G) castalagin, (H) acutissimin A, (I) epiacutissimin A.

**Figure S-17: CID Data Points – CID 50K, AGC 5e4**

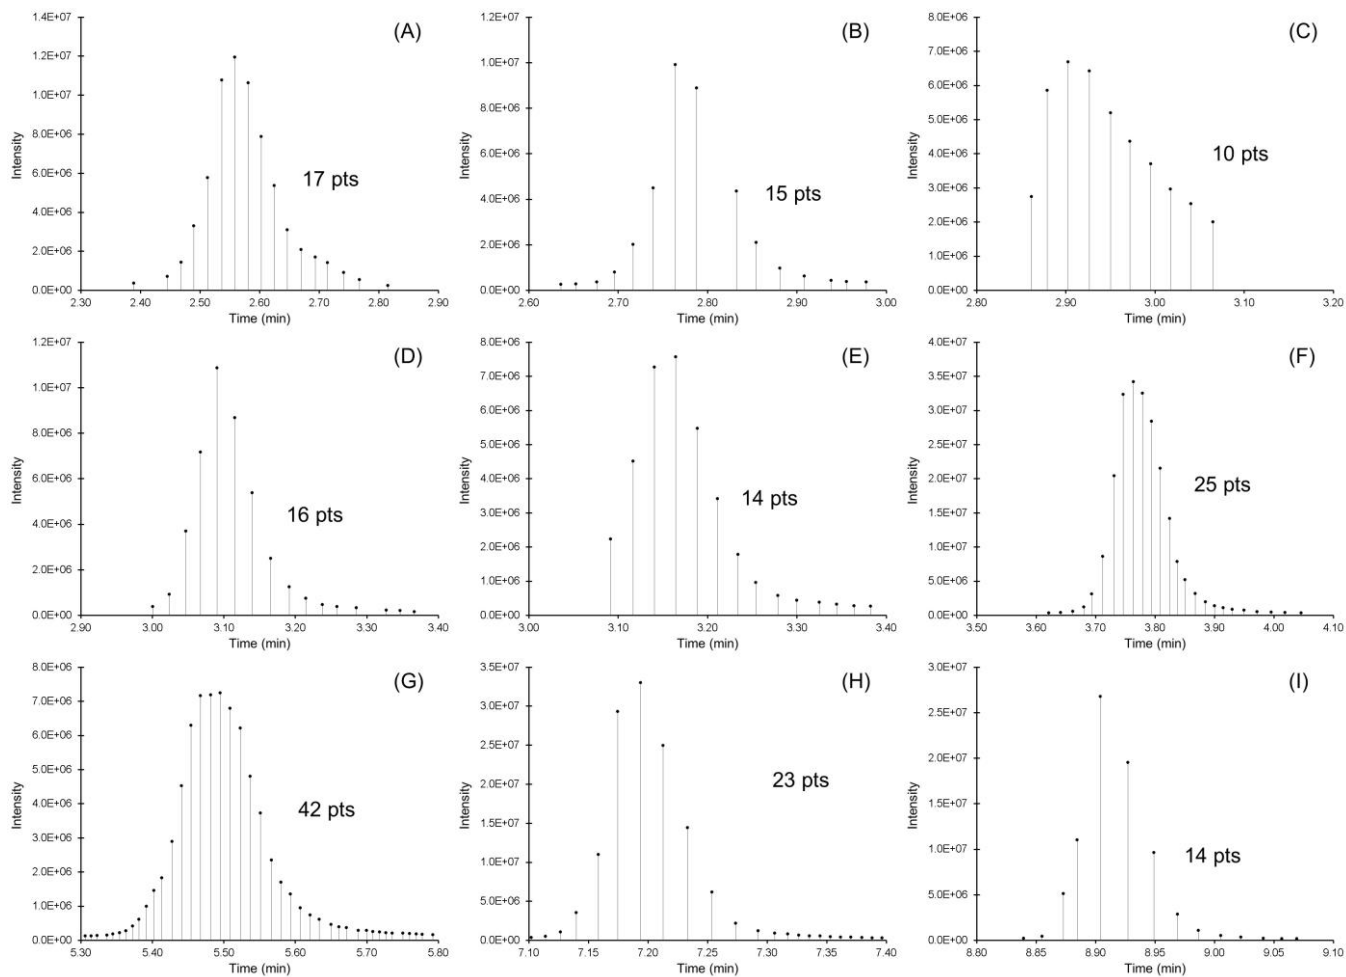

**Figure S-17:** Discrete CID data points of the  $[M-2H]^{2-}$  ion for 40 ng of each ellagitannin acquired with a dianion HCD-CID screen at an AGC setting of 5e4 and Orbitrap resolution of 50K for CID spectra: (A) roburin B/C, (B) roburin A, (C) grandinin, (D) roburin D, (E) roburin E, (F) vescalagin, (G) castalagin, (H) acutissimin A, (I) epiacutissimin A.

**Figure S-18: CID Data Points – CID 30K, AGC 5e4**

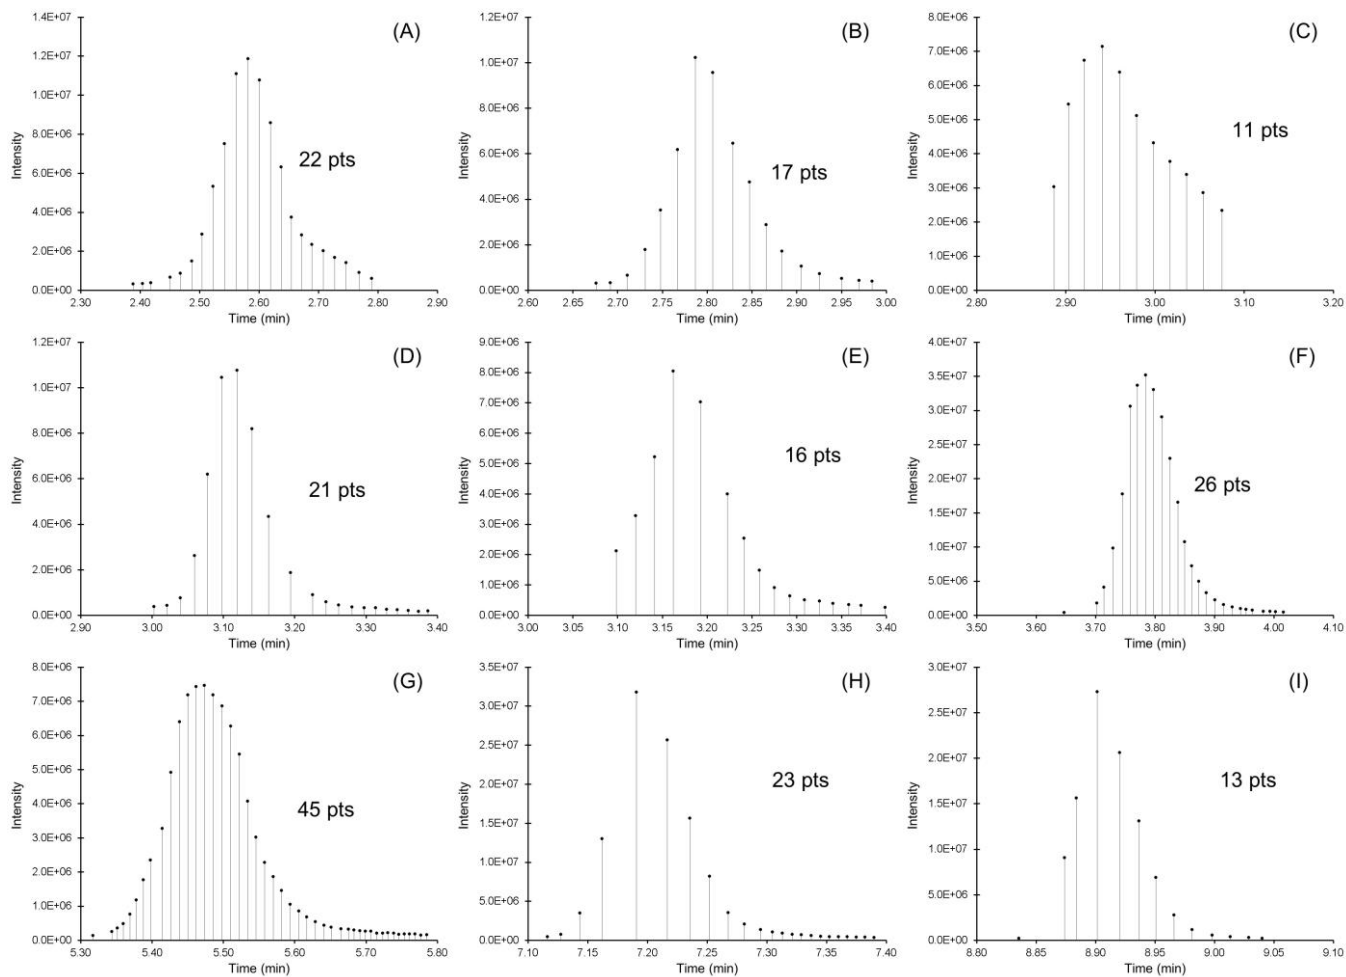

**Figure S-18:** Discrete CID data points of the  $[M-2H]^{2-}$  ion for 40 ng of each ellagitannin acquired with a dianion HCD-CID screen at an AGC setting of 5e4 and Orbitrap resolution of 30K for CID spectra: (A) roburin B/C, (B) roburin A, (C) grandinin, (D) roburin D, (E) roburin E, (F) vescalagin, (G) castalagin, (H) acutissimin A, (I) epiacutissimin A.

**Figure S-19: CID Data Points – CID 15K, AGC 5e4**

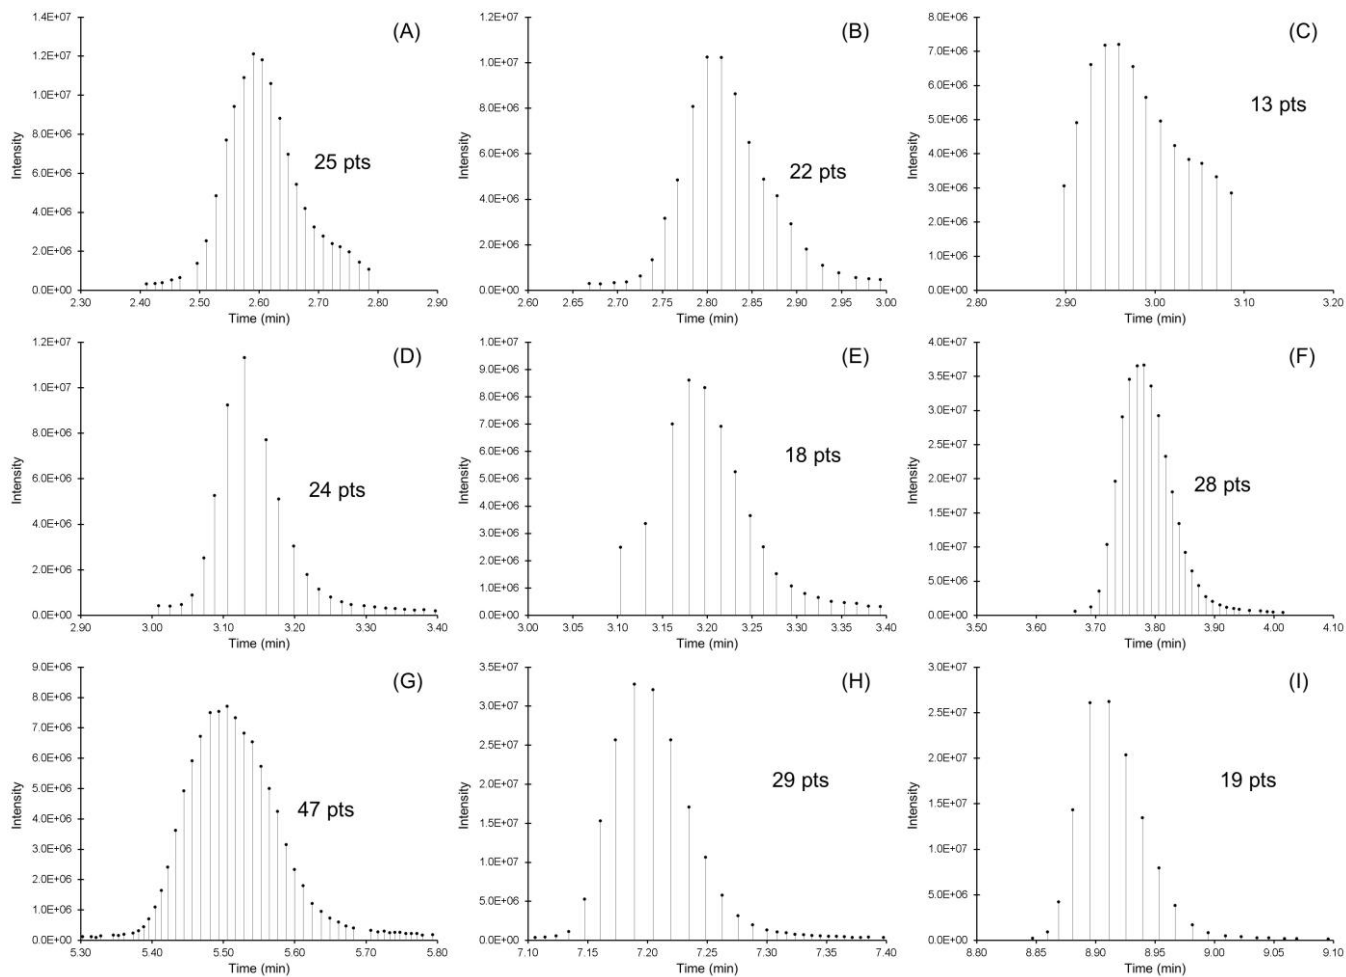

**Figure S-19:** Discrete CID data points of the  $[M-2H]^{2-}$  ion for 40 ng of each ellagitannin acquired with a dianion HCD-CID screen at an AGC setting of 5e4 and Orbitrap resolution of 15K for CID spectra: (A) roburin B/C, (B) roburin A, (C) grandinin, (D) roburin D, (E) roburin E, (F) vescalagin, (G) castalagin, (H) acutissimin A, (I) epiacutissimin A.



**Figure S-20: CID Data Points – CID 50K, AGC 1e4**

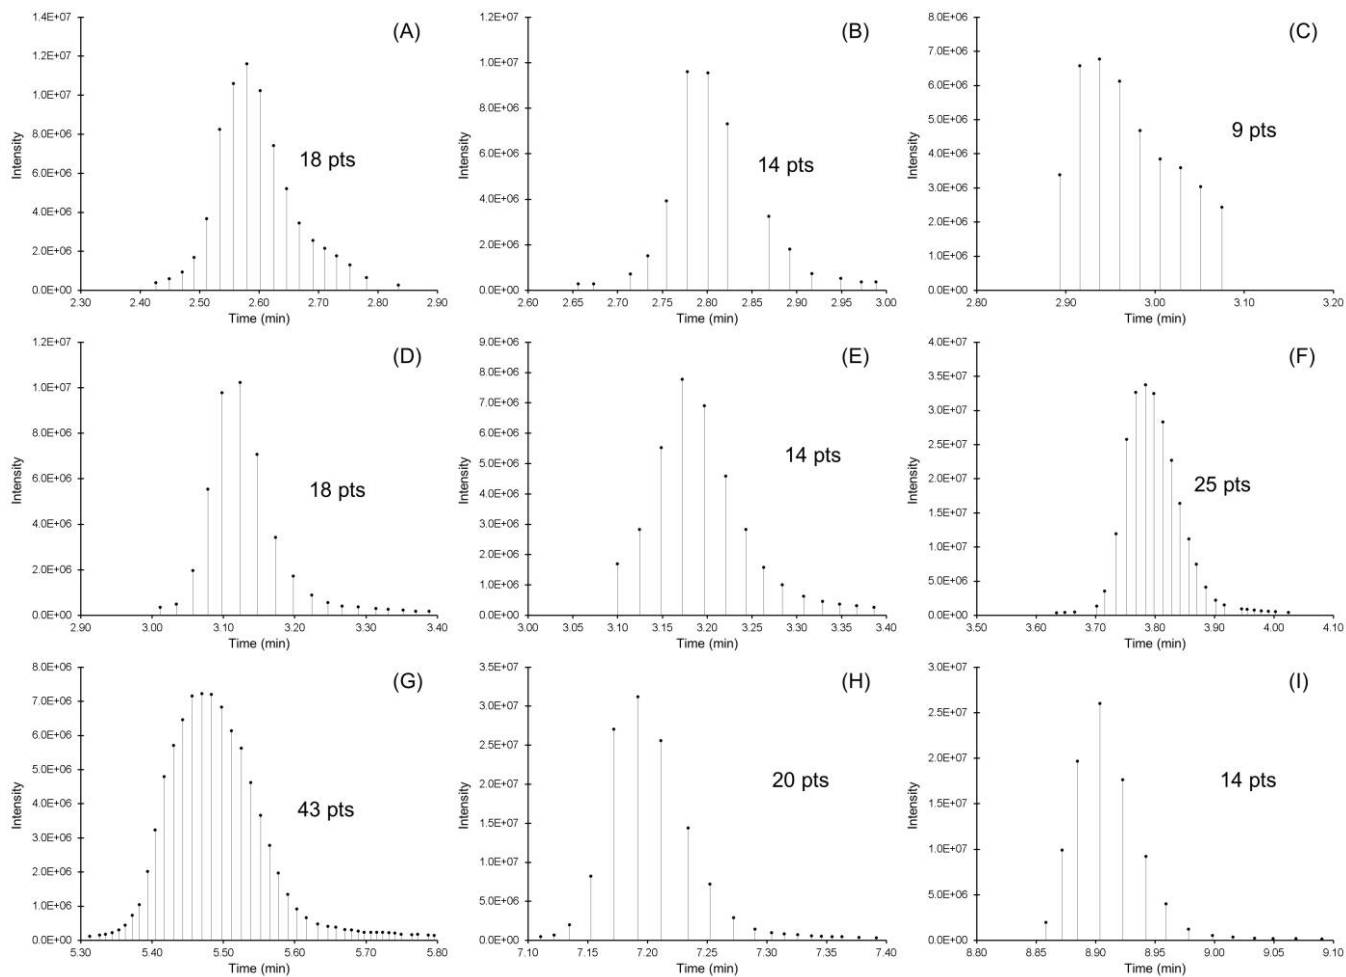

**Figure S-20:** Discrete CID data points of the  $[M-2H]^{2-}$  ion for 40 ng of each ellagitannin acquired with a dianion HCD-CID screen at an AGC setting of 1e4 and Orbitrap resolution of 50K for CID spectra: (A) roburin B/C, (B) roburin A, (C) grandinin, (D) roburin D, (E) roburin E, (F) vescalagin, (G) castalagin, (H) acutissimin A, (I) epiacutissimin A.

**Figure S-21: CID Data Points – CID 30K, AGC 1e4**

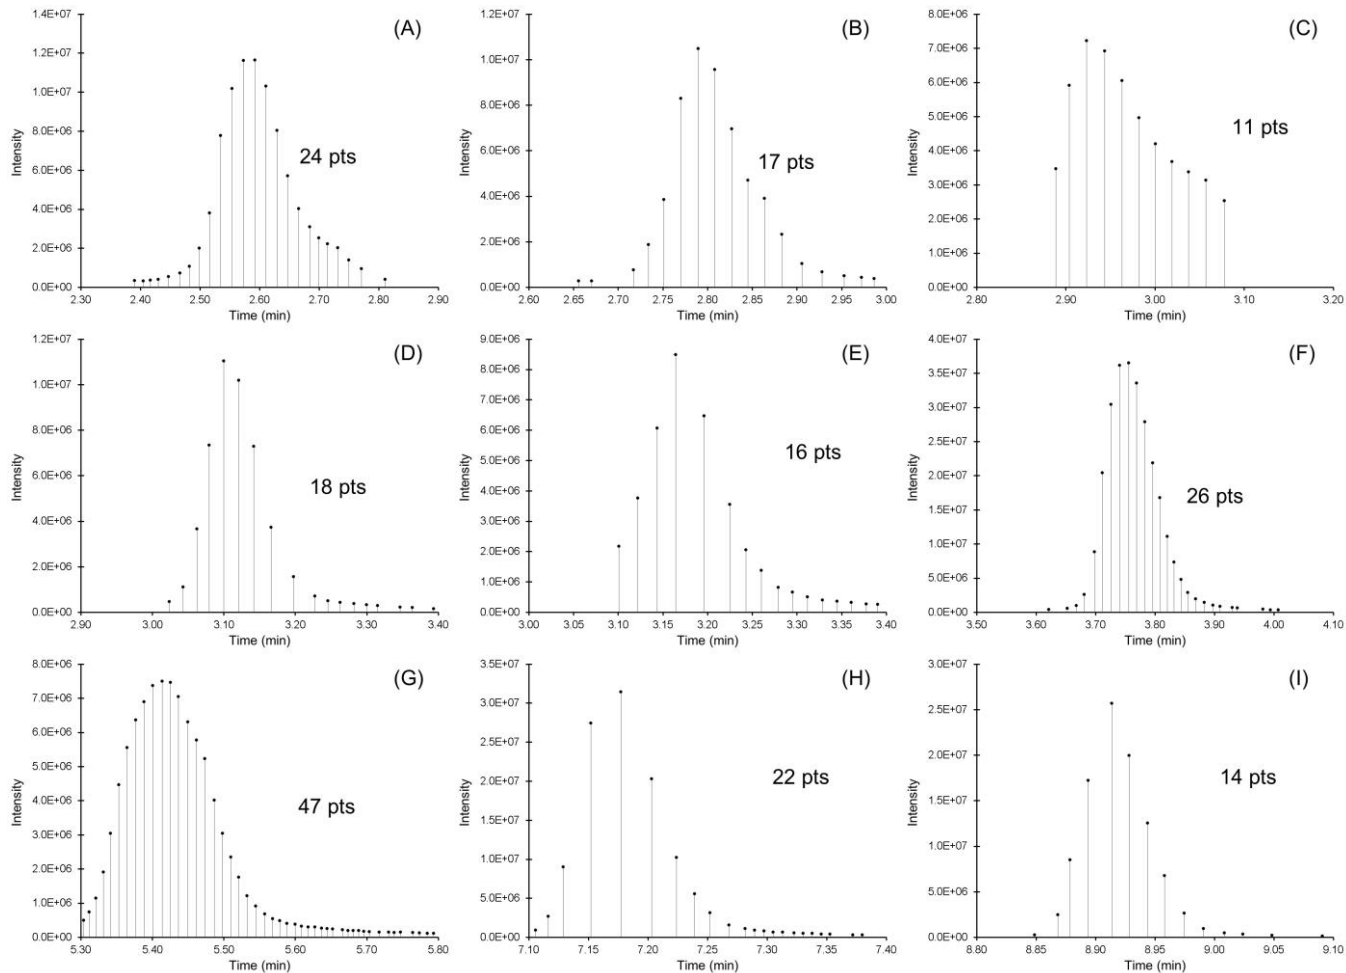

**Figure S-21:** Discrete CID data points of the  $[M-2H]^{2-}$  ion for 40 ng of each ellagitannin acquired with a dianion HCD-CID screen at an AGC setting of 1e4 and Orbitrap resolution of 30K for CID spectra: (A) roburin B/C, (B) roburin A, (C) grandinin, (D) roburin D, (E) roburin E, (F) vescalagin, (G) castalagin, (H) acutissimin A, (I) epiacutissimin A.

**Figure S-22: CID Data Points – CID 15K, AGC 1e4**

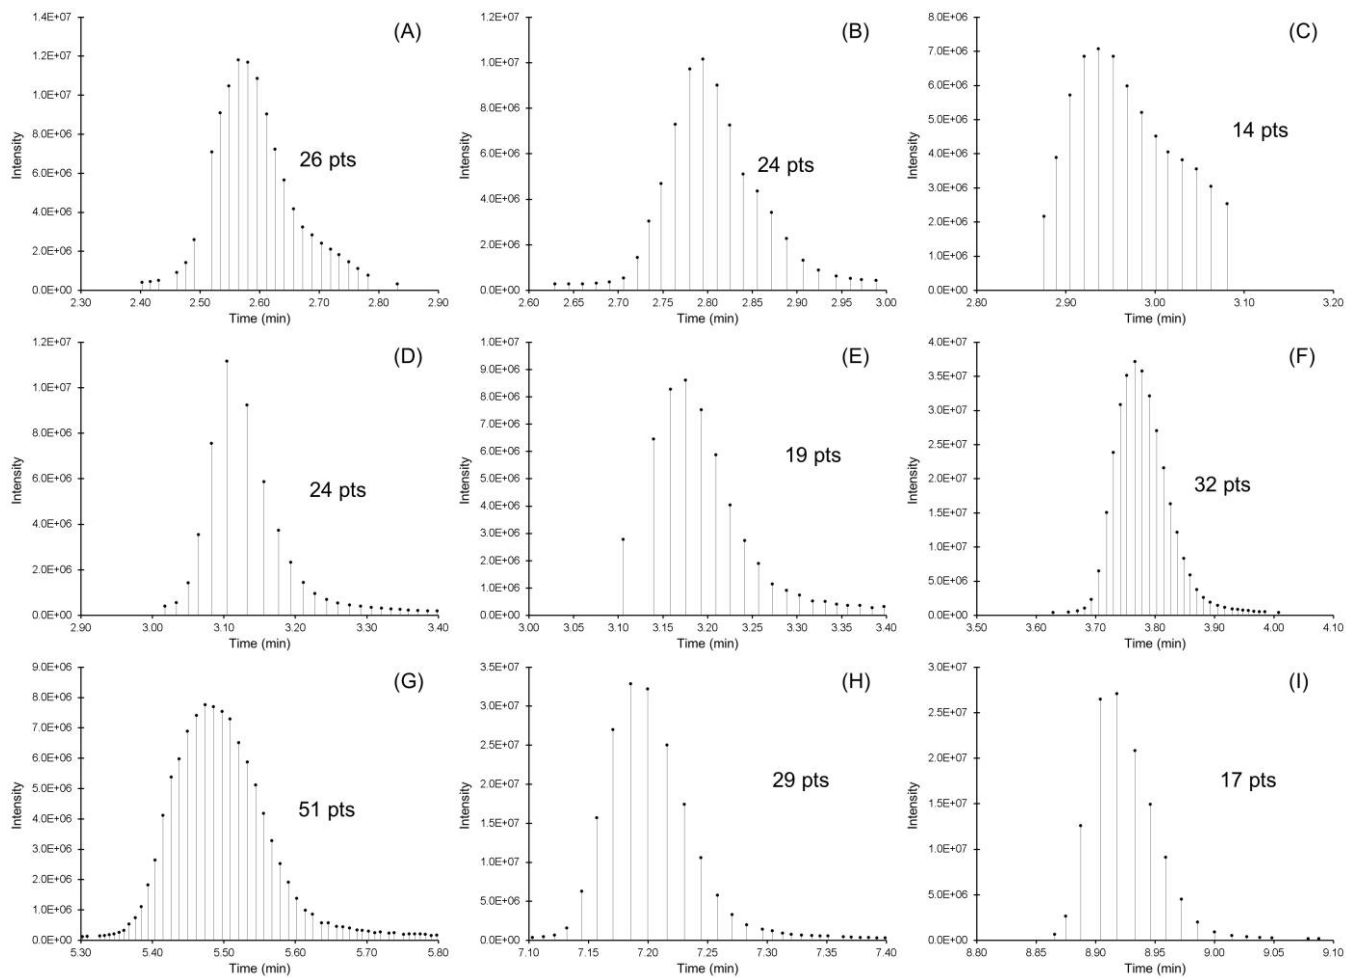

**Figure S-22:** Discrete CID data points of the  $[M-2H]^{2-}$  ion for 40 ng of each ellagitannin acquired with a dianion HCD-CID screen at an AGC setting of 1e4 and Orbitrap resolution of 15K for CID spectra: (A) roburin B/C, (B) roburin A, (C) grandinin, (D) roburin D, (E) roburin E, (F) vescalagin, (G) castalagin, (H) acutissimin A, (I) epiacutissimin A.

**Figure S-23: CID Data Points – IT Normal, AGC 1e4**

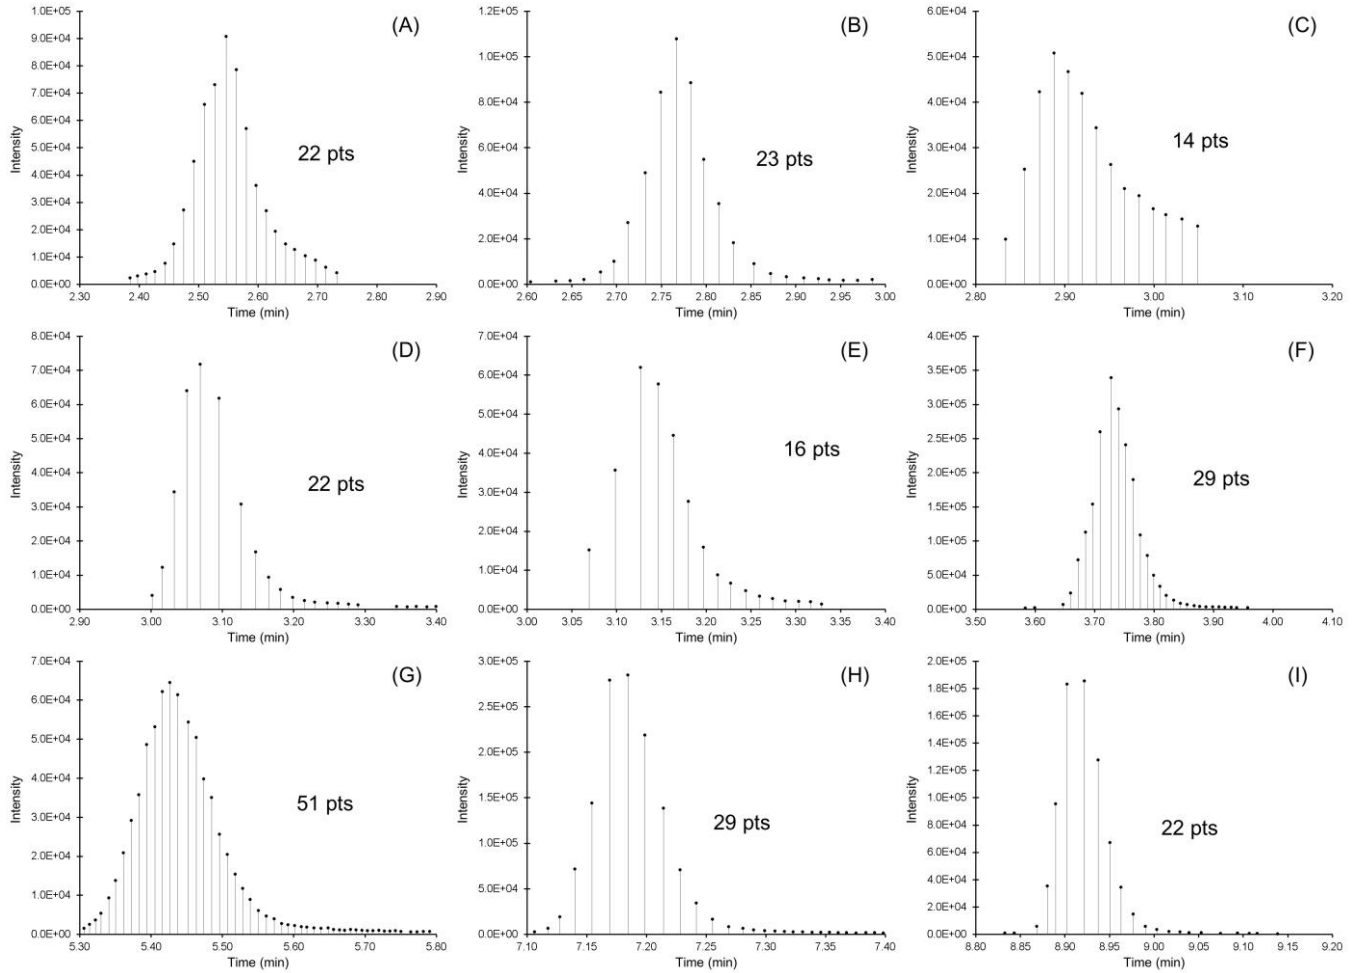

**Figure S-23:** Discrete CID data points of the  $[M-2H]^{2-}$  ion for 40 ng of each ellagitannin acquired with a dianion HCD-CID screen at an AGC setting of 1e4 and Ion Trap scan rate of Normal for CID spectra: (A) roburin B/C, (B) roburin A, (C) grandinin, (D) roburin D, (E) roburin E, (F) vescalagin, (G) castalagin, (H) acutissimin A, (I) epiacutissimin A.

**Figure S-24: CID Data Points – IT Rapid, AGC 1e4**

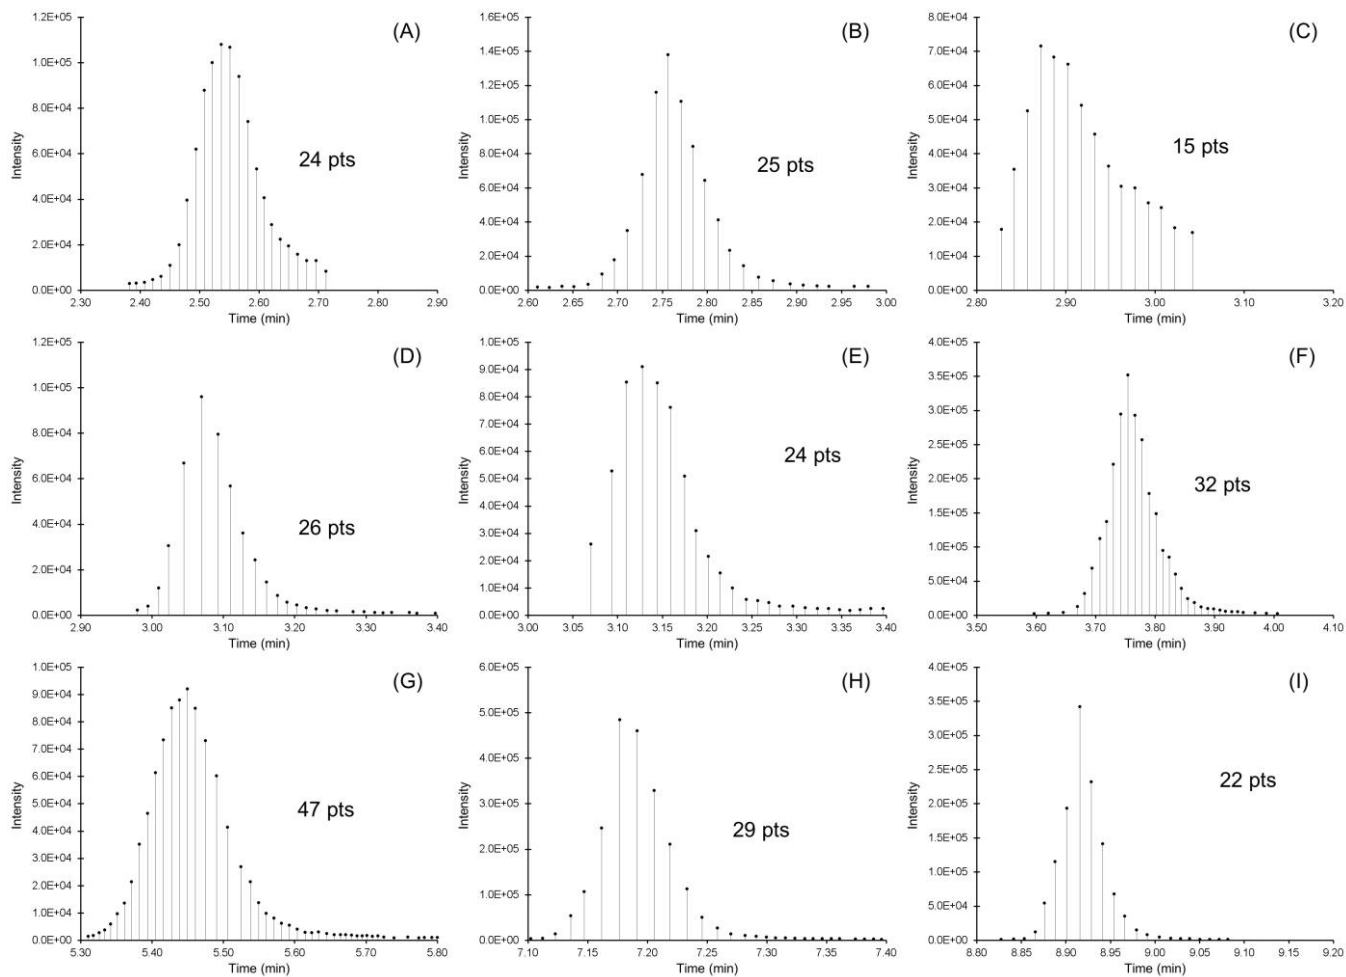

**Figure S-24:** Discrete CID data points of the  $[M-2H]^{2-}$  ion for 40 ng of each ellagitannin acquired with a dianion HCD-CID screen at an AGC setting of 1e4 and Ion Trap scan rate of Rapid for CID spectra: (A) roburin B/C, (B) roburin A, (C) grandinin, (D) roburin D, (E) roburin E, (F) vescalagin, (G) castalagin, (H) acutissimin A, (I) epiacutissimin A.

**Figure S-25: CID Data Points – IT Turbo, AGC 1e4**

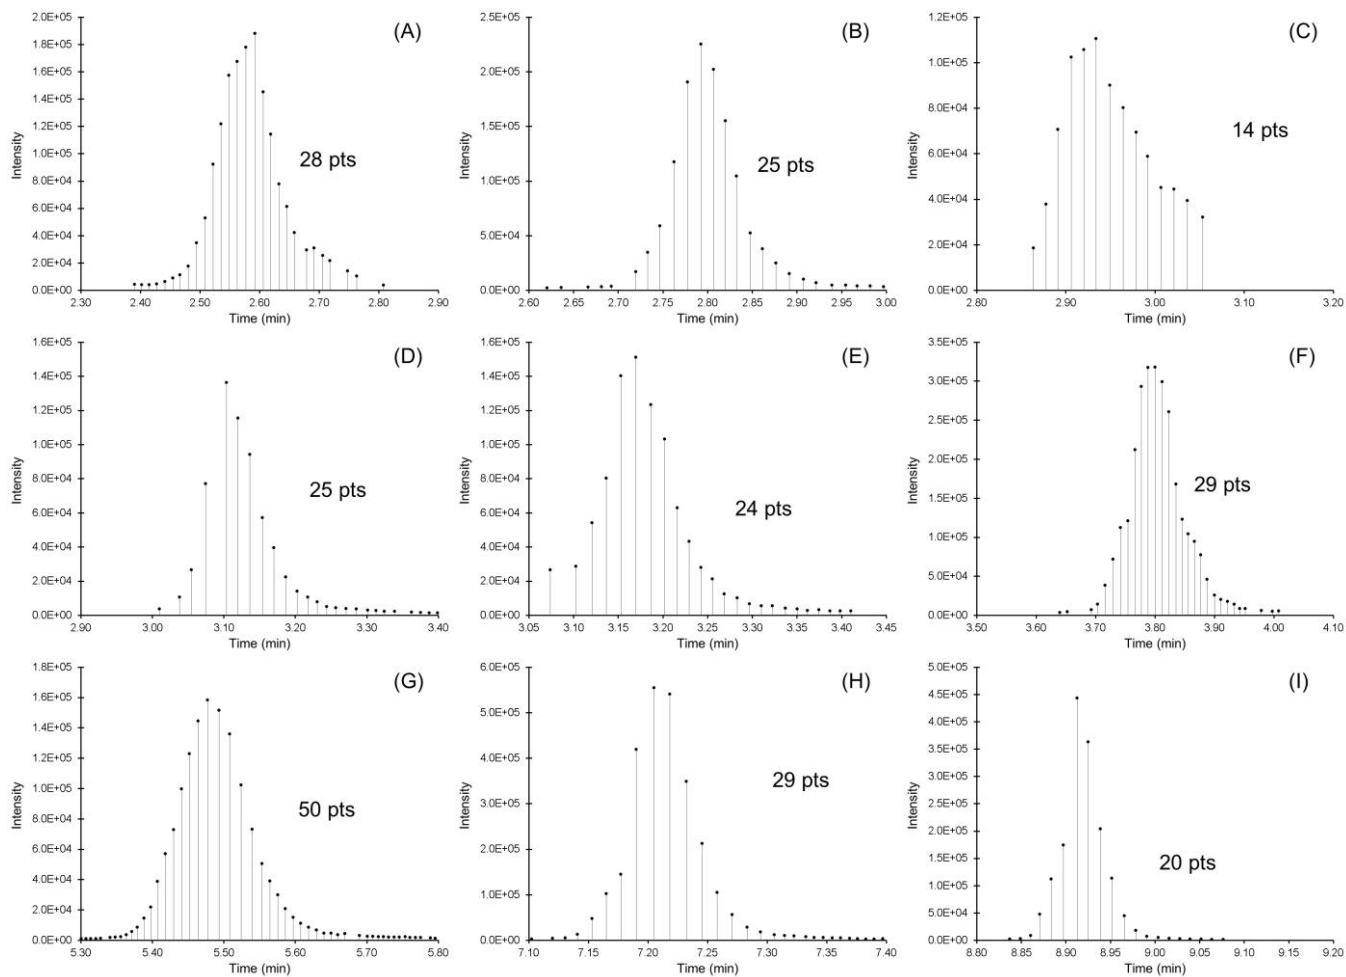

**Figure S-25:** Discrete CID data points of the  $[M-2H]^{2-}$  ion for 40 ng of each ellagitannin acquired with a dianion HCD-CID screen at an AGC setting of 1e4 and Ion Trap scan rate of Turbo for CID spectra: (A) roburin B/C, (B) roburin A, (C) grandinin, (D) roburin D, (E) roburin E, (F) vescalagin, (G) castalagin, (H) acutissimin A, (I) epiacutissimin A.

### Figure S-26: CID Spectra – Orbitrap vs Ion Trap

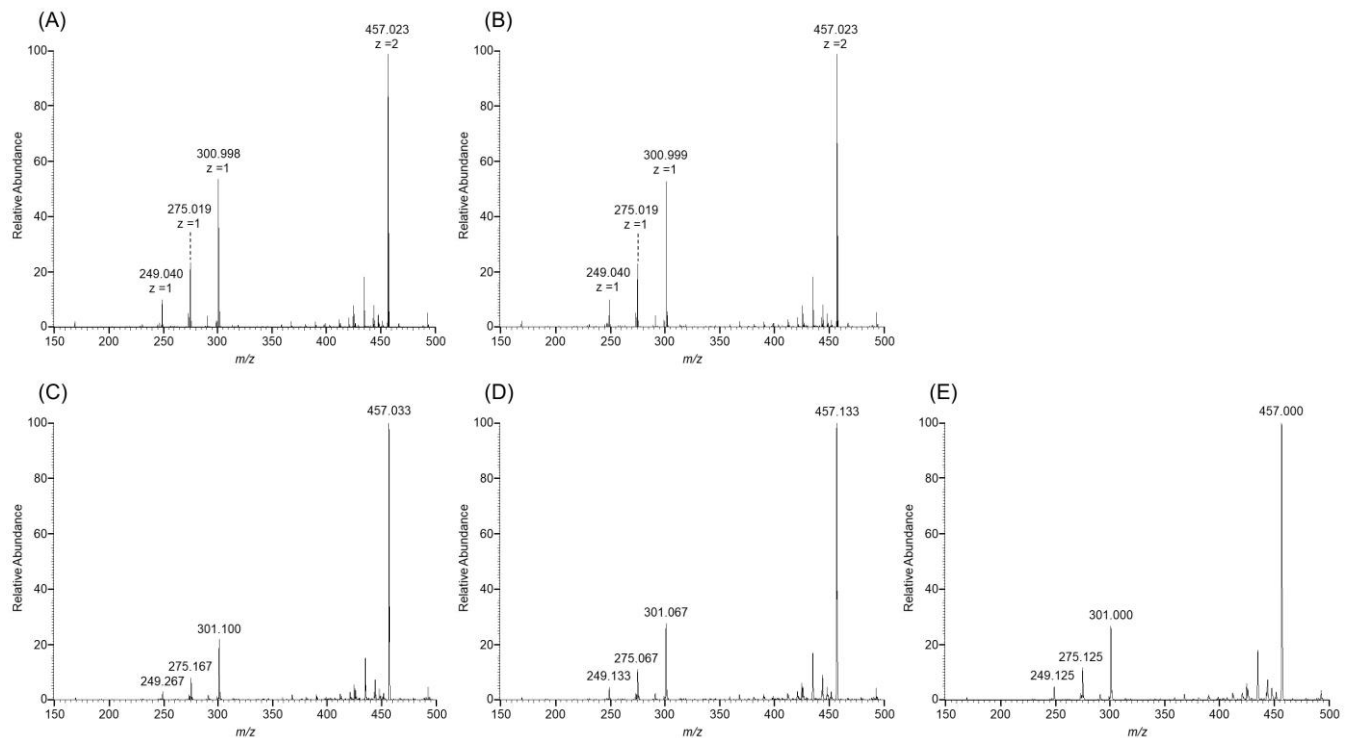

**Figure S-26:** CID spectra of castalagin acquired via a dianion HCD-CID screen with varied CID scan conditions of: (A) Orbitrap - 15K, 5e4 AGC, (B) Orbitrap - 15K, 1e4 AGC, (C) Ion Trap - Normal, 1e4 AGC, (D) Ion Trap - Rapid, 1e4 AGC, (E) Ion Trap - Turbo, 1e4 AGC.

**Figure S-27: CID EICs – Standards, 40 ng to 1.25 ng**

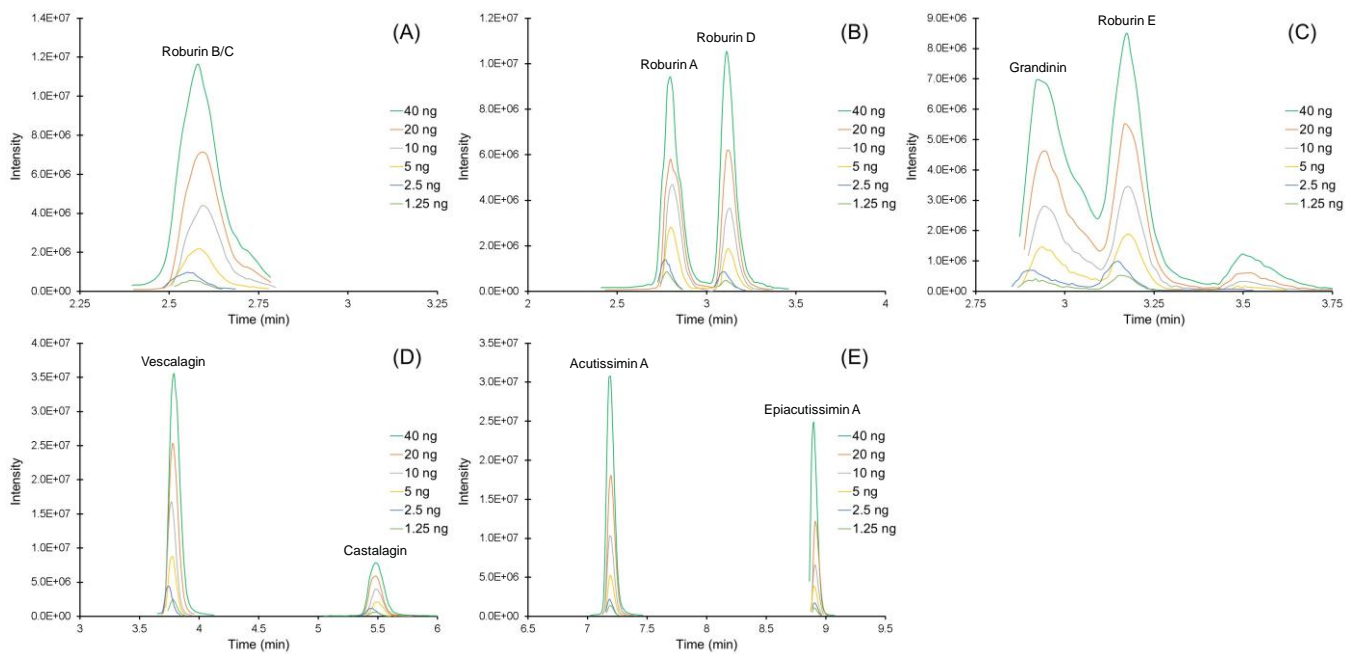

**Figure S-27:** CID EICs for dilutions of: (A) roburin B/C [M-2H]<sup>2-</sup>, (B) roburin A [M-2H]<sup>2-</sup> & roburin D [M-2H]<sup>2-</sup>, (C) grandinin [M-2H]<sup>2-</sup> & roburin E [M-2H]<sup>2-</sup>, (D) vescalagin [M-2H]<sup>2-</sup> & castalagin [M-2H]<sup>2-</sup>, (E) acutissimin A [M-2H]<sup>2-</sup> & epiacutissimin A [M-2H]<sup>2-</sup>.



**Figure S-28: CID Data Points – Standards, 5 ng**

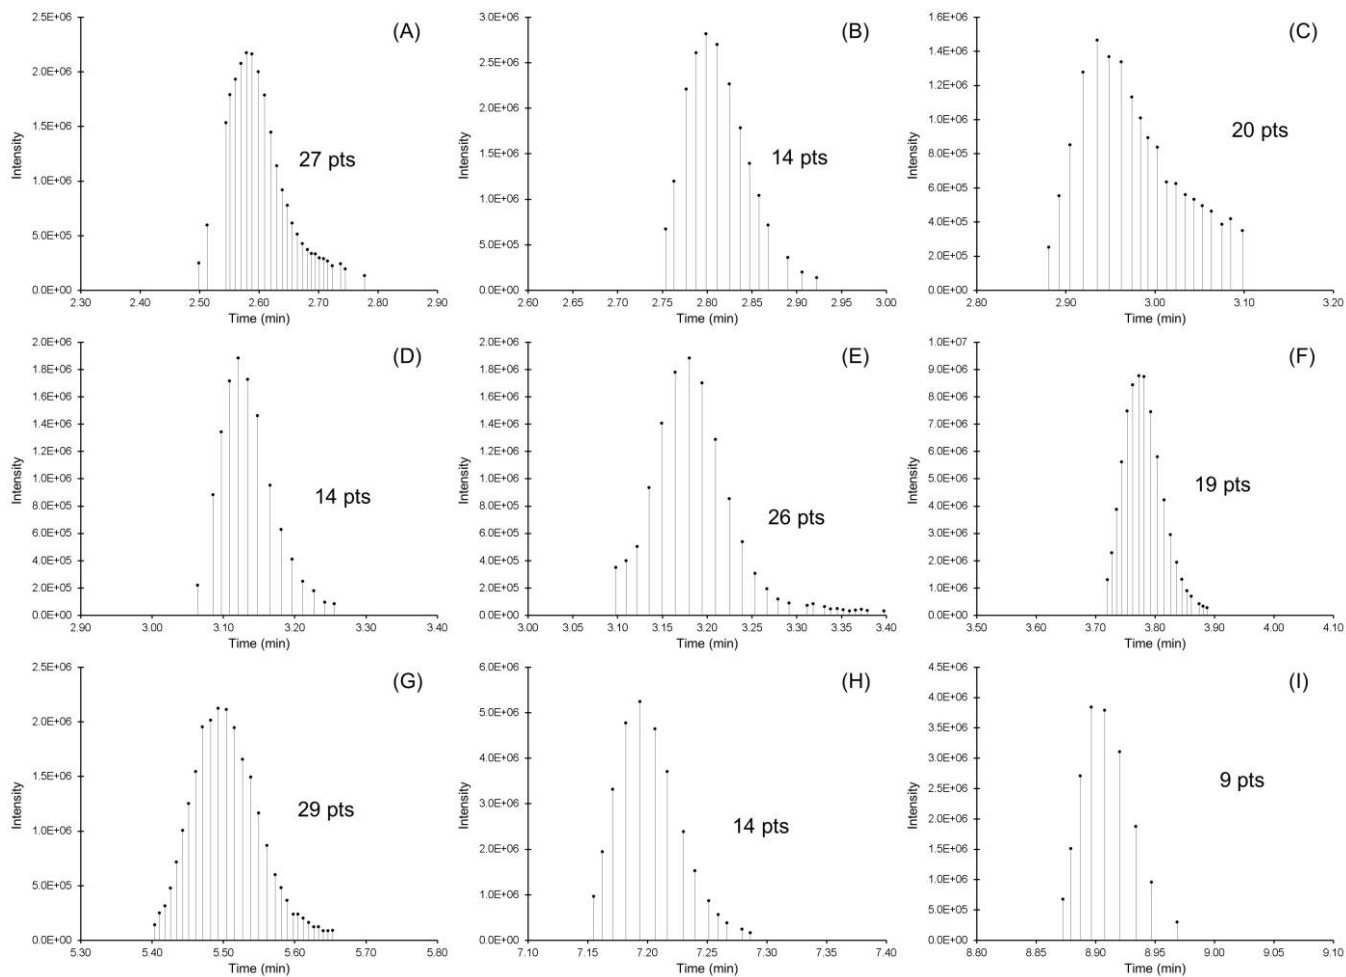

**Figure S-28:** Discrete CID data points for 5 ng of each ellagitannin  $[M-2H]^{2-}$  acquired with a dianion HCD-CID screen: (A) roburin B/C, (B) roburin A, (C) grandinin, (D) roburin D, (E) roburin E, (F) vescalagin, (G) castalagin, (H) acutissimin A, (I) epiacutissimin A.

**Figure S-29: CID Data Points – Standards, 2.5 ng**

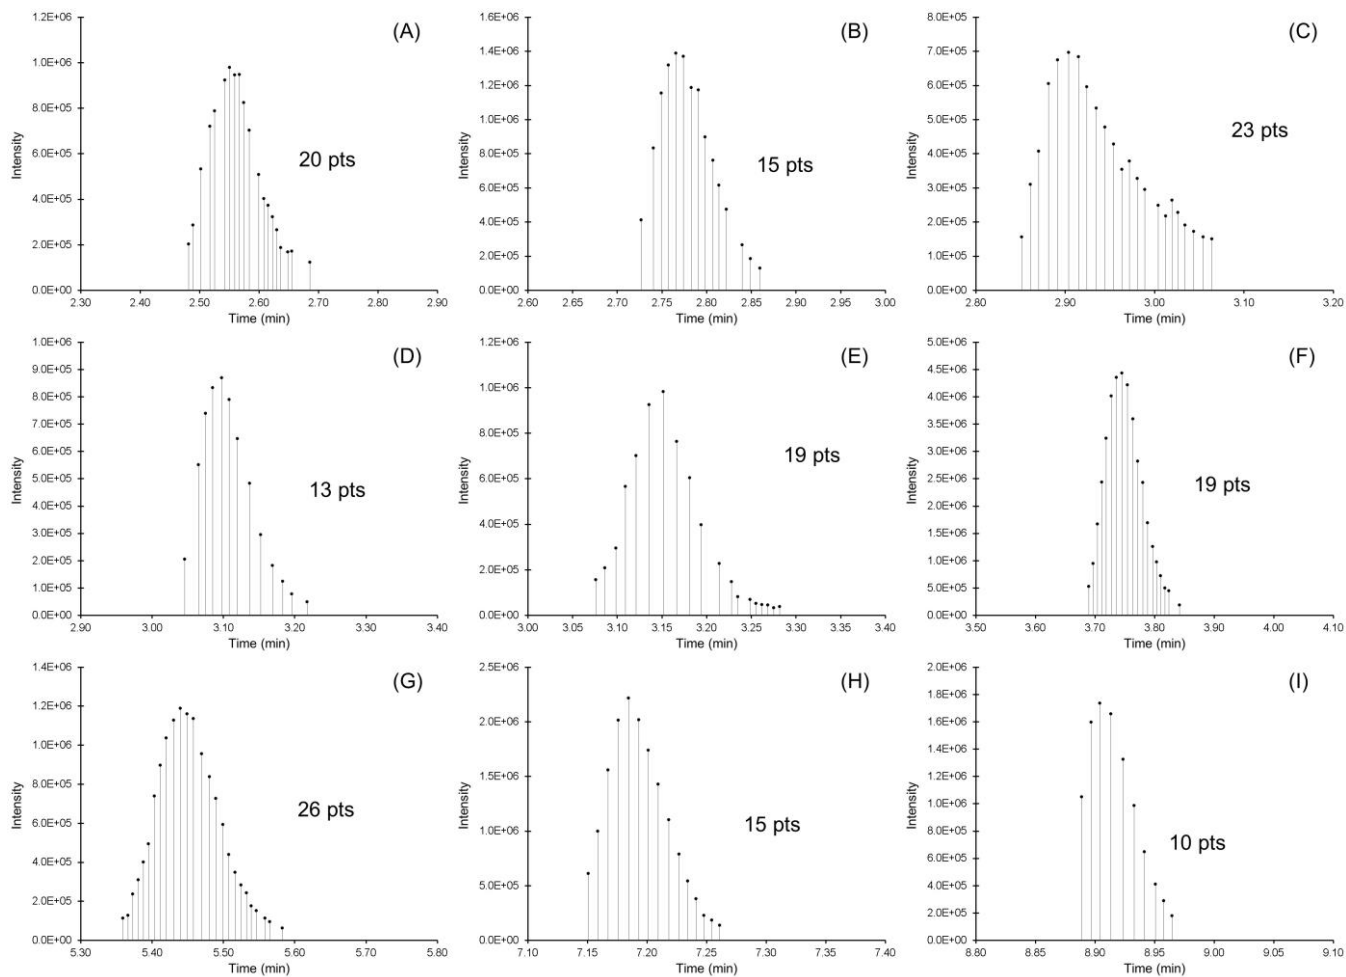

**Figure S-29:** Discrete CID data points for 2.5 ng of each ellagitannin  $[M-2H]^{2-}$  acquired with a dianion HCD-CID screen: (A) roburin B/C, (B) roburin A, (C) grandinin, (D) roburin D, (E) roburin E, (F) vescalagin, (G) castalagin, (H) acutissimin A, (I) epiacutissimin A.

**Figure S-30: CID Data Points – Standards, 1.25 ng**

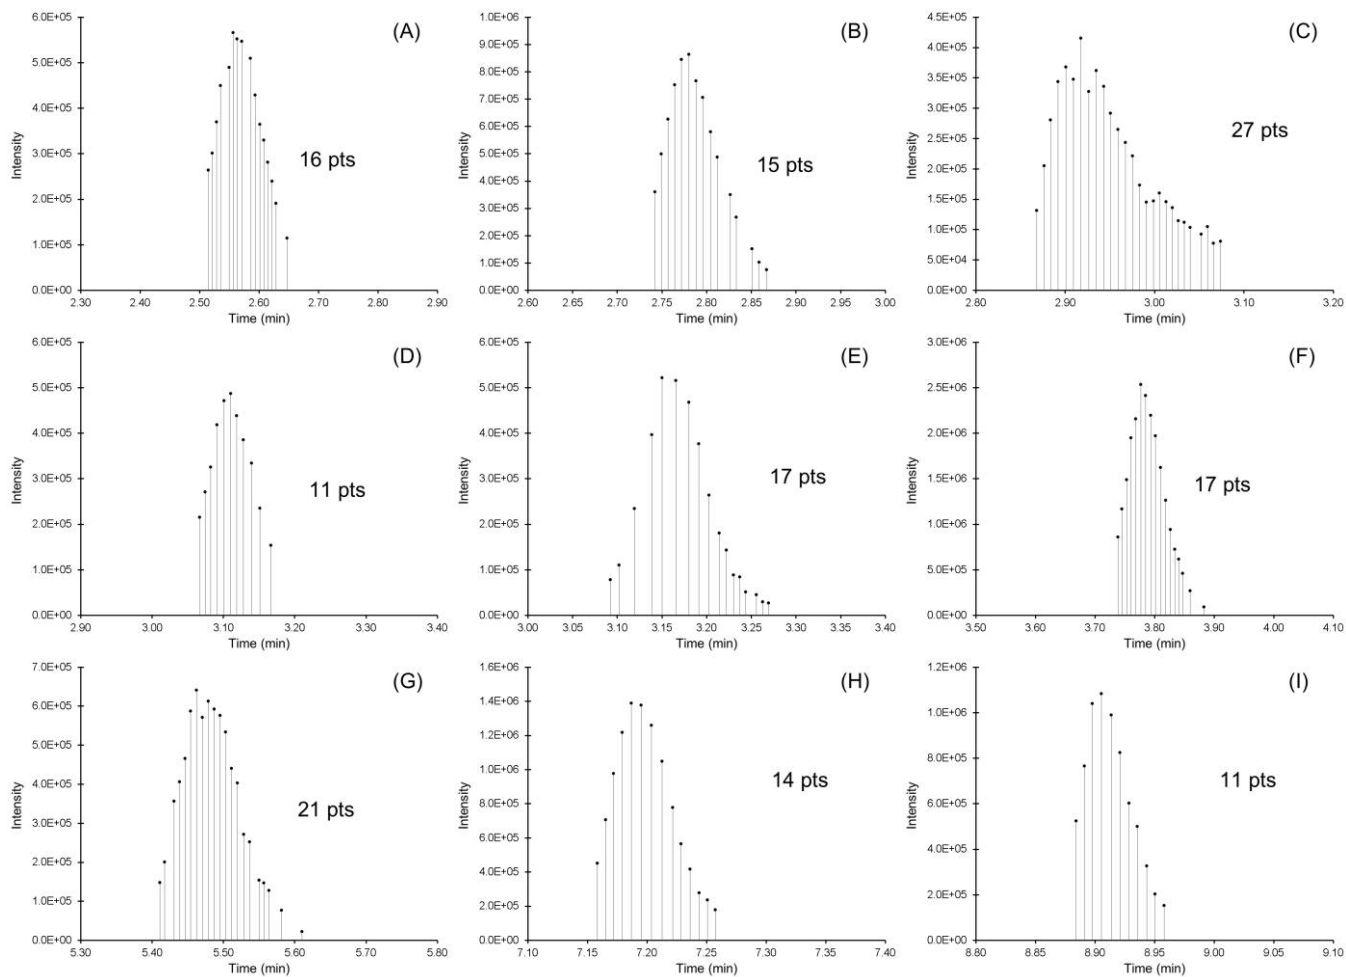

**Figure S-30:** Discrete CID data points for 1.25 ng of each ellagitannin  $[M-2H]^{2-}$  acquired with a dianion HCD-CID screen: (A) roburin B/C, (B) roburin A, (C) grandinin, (D) roburin D, (E) roburin E, (F) vescalagin, (G) castalagin, (H) acutissimin A, (I) epiacutissimin A.

### Figure S-31: CID Data Points – Single Isomeric Injections

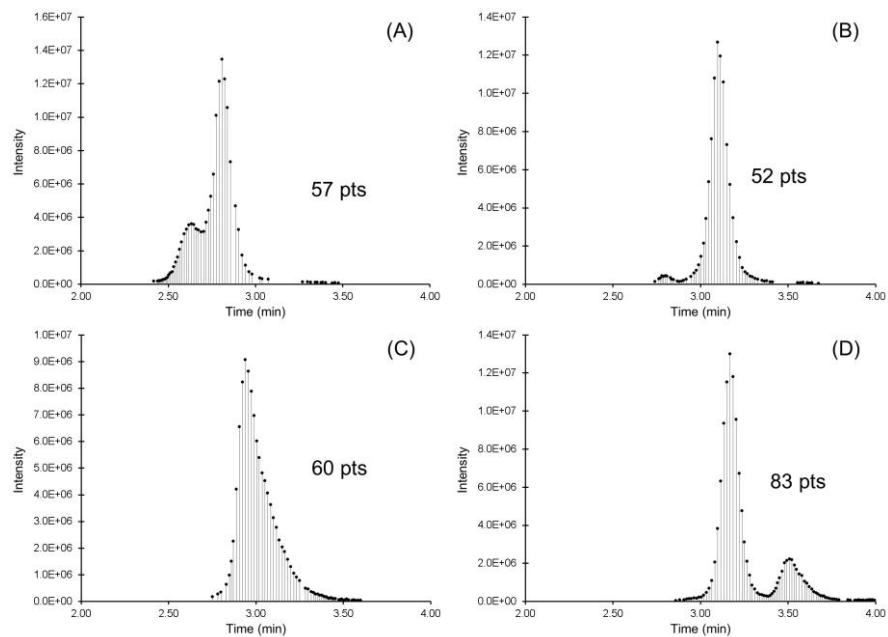

**Figure S-31:** Discrete CID data points for singular isomeric injections of 40 ng of the closest eluting isomers: (A) roburin A [M-2H]<sup>2-</sup>, (B) roburin D [M-2H]<sup>2-</sup>, (C) grandinin [M-2H]<sup>2-</sup>, (D) roburin E [M-2H]<sup>2-</sup>.

## Figure S-32: Mixture Specificity, T-3RT

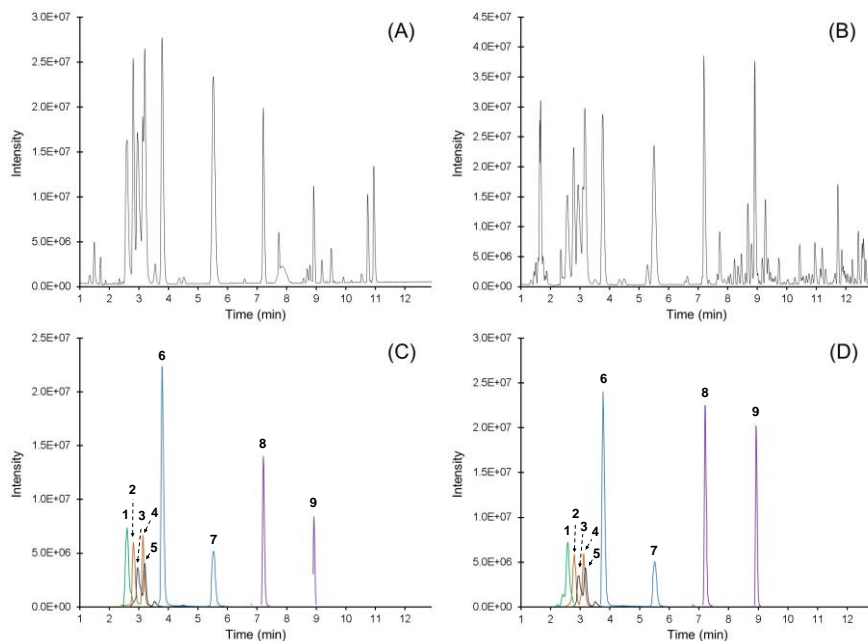

**Figure S-32:** Application of a dianion HCD-CID screen with T-3RT. MS chromatogram of: (A) 10  $\mu\text{g/mL}$  of ellagitannin standards, (B) Mixture of 100  $\text{mg/mL}$  of amaranth and 10  $\mu\text{g/mL}$  of ellagitannin standards. CID EIC of each ellagitannin standard for: (C) 10  $\mu\text{g/mL}$  ellagitannin standards, (D) 100  $\text{mg/mL}$  of amaranth and 10  $\mu\text{g/mL}$  of ellagitannin standards. Annotation of standards in (C) and (D): 1. roburin B/C  $[\text{M}-2\text{H}]^{2-}$  green trace, 2. roburin A  $[\text{M}-2\text{H}]^{2-}$  orange trace, 3. grandinin  $[\text{M}-2\text{H}]^{2-}$  black trace, 4. roburin D  $[\text{M}-2\text{H}]^{2-}$  orange trace, 5. roburin E  $[\text{M}-2\text{H}]^{2-}$  black trace, 6. vescalagin  $[\text{M}-2\text{H}]^{2-}$  blue trace, 7. castalagin  $[\text{M}-2\text{H}]^{2-}$ , blue trace, 8. acutissimin A  $[\text{M}-2\text{H}]^{2-}$  purple trace, 9. epiacutissimin A  $[\text{M}-2\text{H}]^{2-}$  purple trace.

### Figure S-33: Mixture Specificity, T-2RT

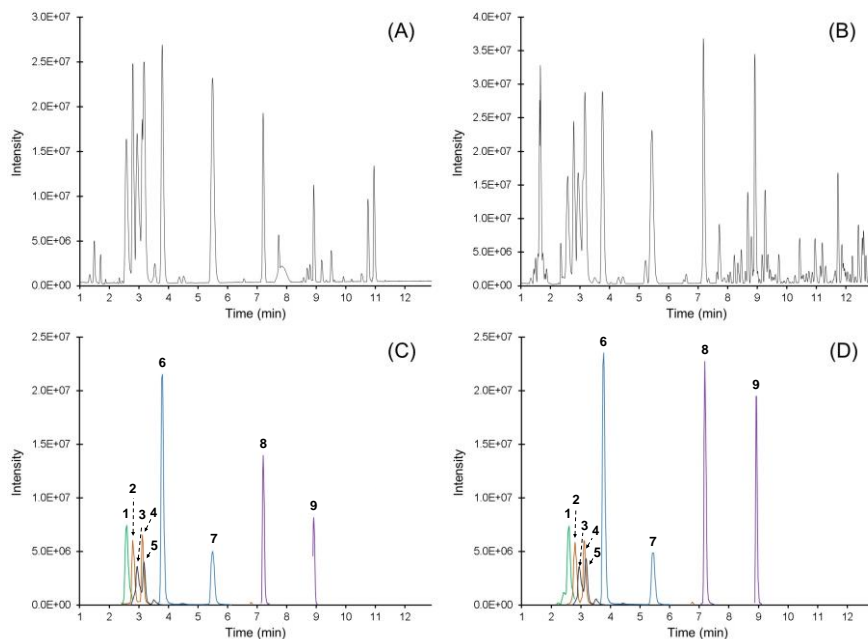

**Figure S-33:** Application of a dianion HCD-CID screen with T-2RT. MS chromatogram of: (A) 10 µg/mL of ellagitannin standards, (B) Mixture of 100 mg/mL of amaranth and 10 µg/mL of ellagitannin standards. CID EIC of each ellagitannin standard for: (C) 10 µg/mL ellagitannin standards, (D) 100 mg/mL of amaranth and 10 µg/mL of ellagitannin standards. Annotation of standards in (C) and (D): 1. roburin B/C [M-2H]<sup>2-</sup> green trace, 2. roburin A [M-2H]<sup>2-</sup> orange trace, 3. grandinin [M-2H]<sup>2-</sup> black trace, 4. roburin D [M-2H]<sup>2-</sup> orange trace, 5. roburin E [M-2H]<sup>2-</sup> black trace, 6. vescalagin [M-2H]<sup>2-</sup> blue trace, 7. castalagin [M-2H]<sup>2-</sup>, blue trace, 8. acutissimin A [M-2H]<sup>2-</sup> purple trace, 9. epiacutissimin A [M-2H]<sup>2-</sup> purple trace.

### Figure S-34: Mixture Specificity, T-1RT

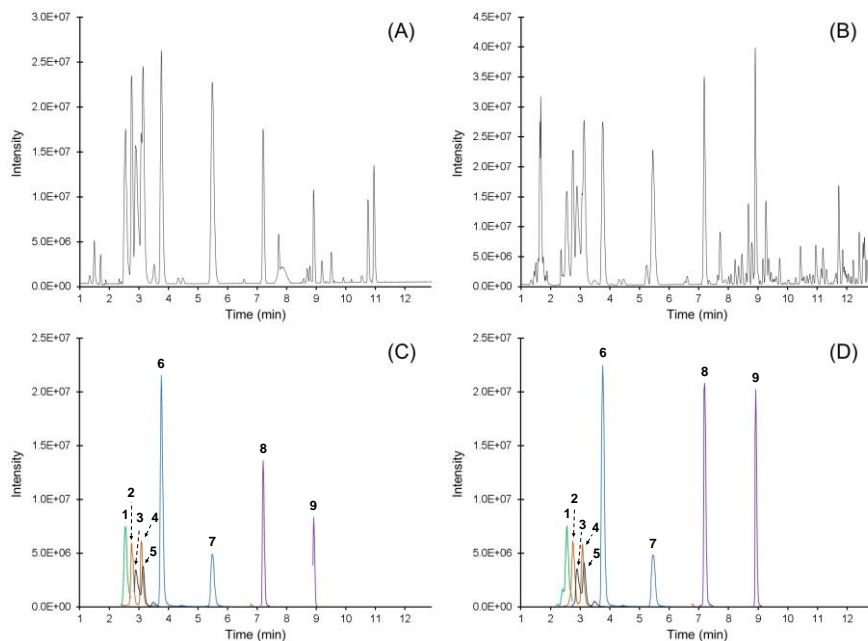

**Figure S-34:** Application of a dianion HCD-CID screen with T-1RT. MS chromatogram of: (A) 10 µg/mL of ellagitannin standards, (B) Mixture of 100 mg/mL of amaranth and 10 µg/mL of ellagitannin standards. CID EIC of each ellagitannin standard for: (C) 10 µg/mL ellagitannin standards, (D) 100 mg/mL of amaranth and 10 µg/mL of ellagitannin standards. Annotation of standards in (C) and (D): 1. roburin B/C [M-2H]<sup>2-</sup> green trace, 2. roburin A [M-2H]<sup>2-</sup> orange trace, 3. grandinin [M-2H]<sup>2-</sup> black trace, 4. roburin D [M-2H]<sup>2-</sup> orange trace, 5. roburin E [M-2H]<sup>2-</sup> black trace, 6. vescalagin [M-2H]<sup>2-</sup> blue trace, 7. castalagin [M-2H]<sup>2-</sup>, blue trace, 8. acutissimin A [M-2H]<sup>2-</sup> purple trace, 9. epiacutissimin A [M-2H]<sup>2-</sup> purple trace.

**Figure S-35: Mass Trigger Controls, T-3RT**

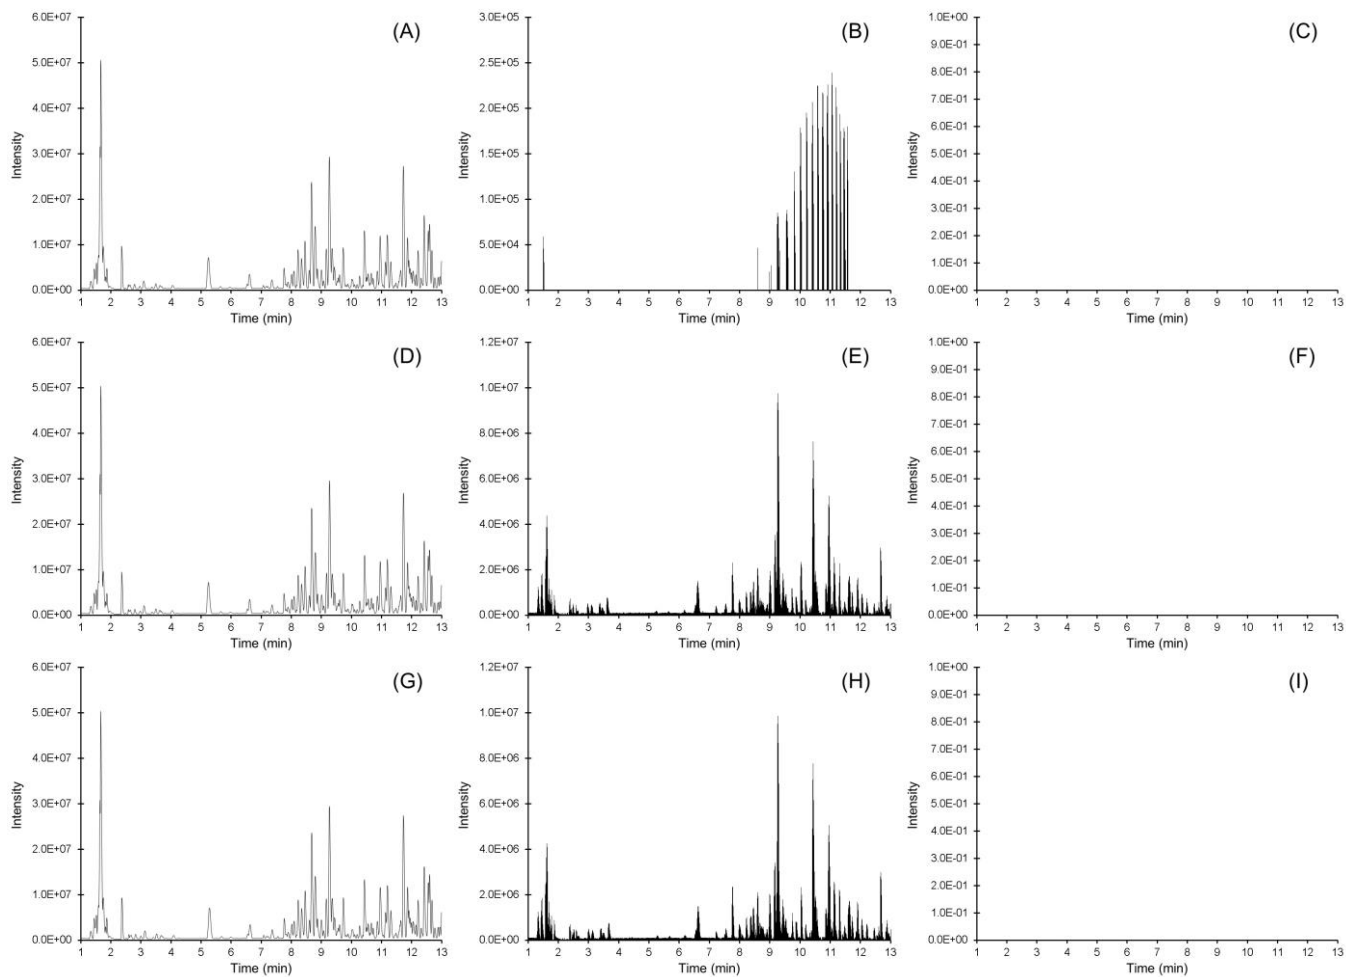

**Figure S-35:** Results of the application of different charge state filters to the HCD-CID screen with T-3RT in amaranth: (A) Dianion - MS chromatogram, (B) Dianion - HCD data points, (C) Dianion - CID data points, (D) Anion - MS chromatogram, (E) Anion - HCD data points, (F) Anion - CID data points, (G) Anion & Dianion - MS chromatogram, (H) Anion & Dianion - HCD data points, (I) Anion & Dianion - CID data points.



**Figure S-36: Mass Trigger Controls, T-2RT**

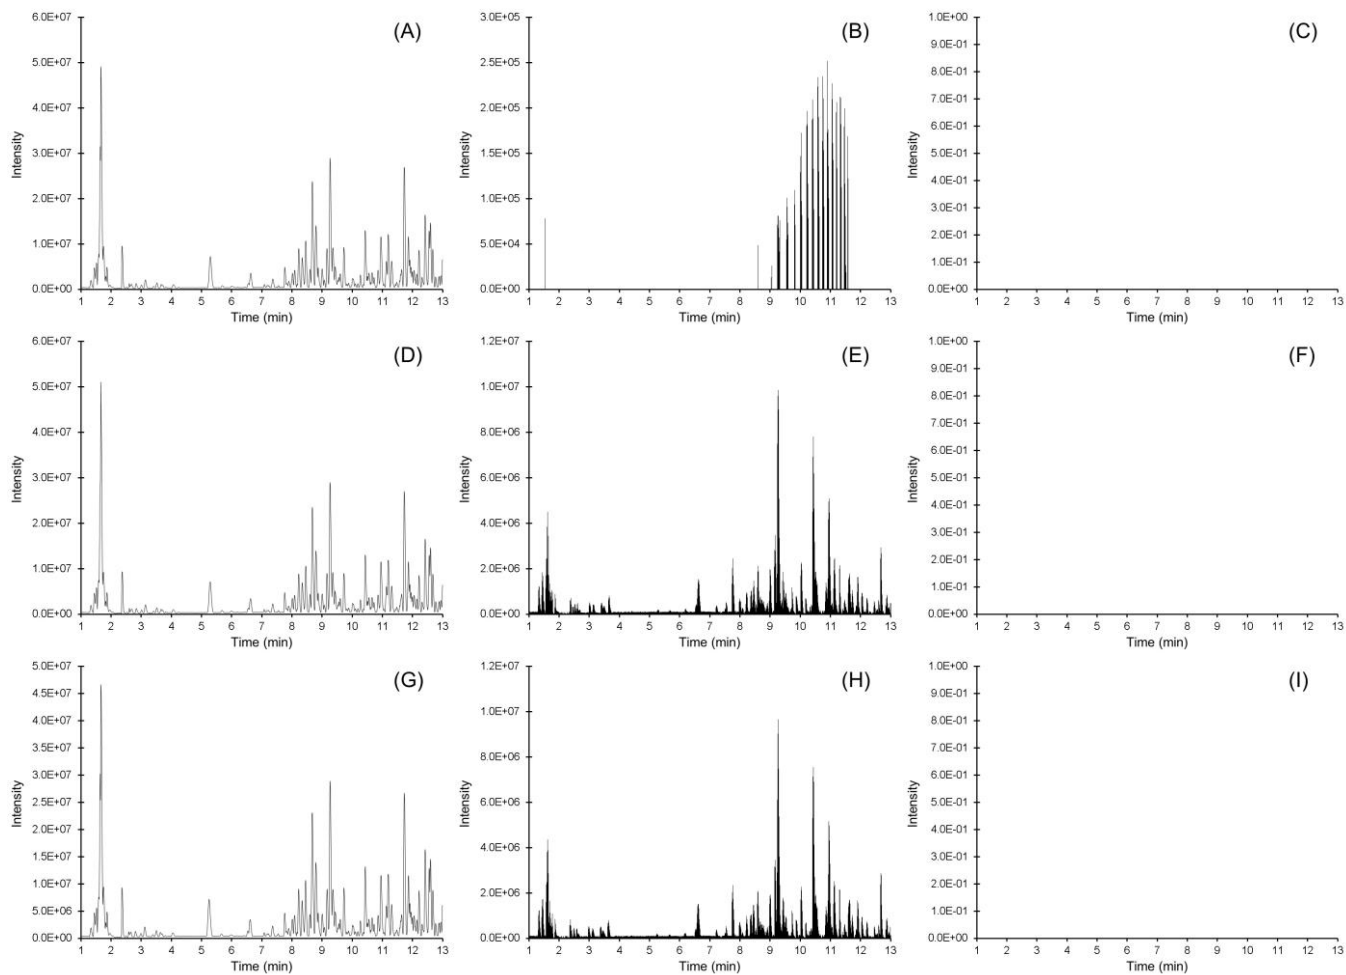

**Figure S-36:** Results of the application of different charge state filters to the HCD-CID screen with T-2RT in amaranth: (A) Dianion - MS chromatogram, (B) Dianion - HCD data points, (C) Dianion - CID data points, (D) Anion - MS chromatogram, (E) Anion - HCD data points, (F) Anion - CID data points, (G) Anion & Dianion - MS chromatogram, (H) Anion & Dianion - HCD data points, (I) Anion & Dianion - CID data points.

### Figure S-37: Mass Trigger Controls, T-1RT

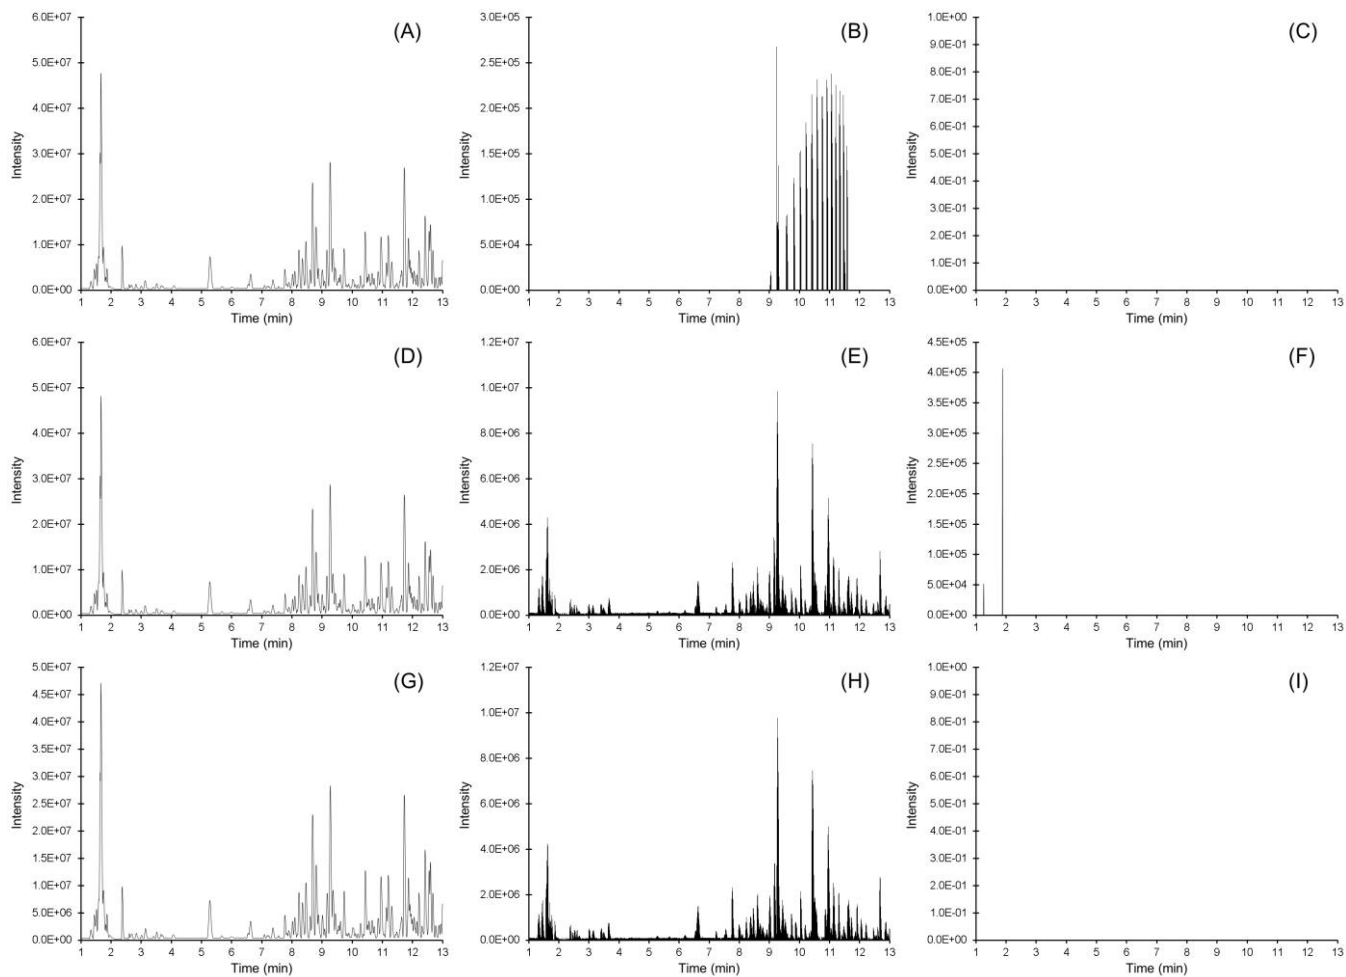

**Figure S-37:** Results of the application of different charge state filters to the HCD-CID screen with T-1RT in amaranth: (A) Dianion - MS chromatogram, (B) Dianion - HCD data points, (C) Dianion - CID data points, (D) Anion - MS chromatogram, (E) Anion - HCD data points, (F) Anion - CID data points, (G) Anion & Dianion - MS chromatogram, (H) Anion & Dianion - HCD data points, (I) Anion & Dianion - CID data points.

### Figure S-38: HCD Product Ions - Potential Interferents

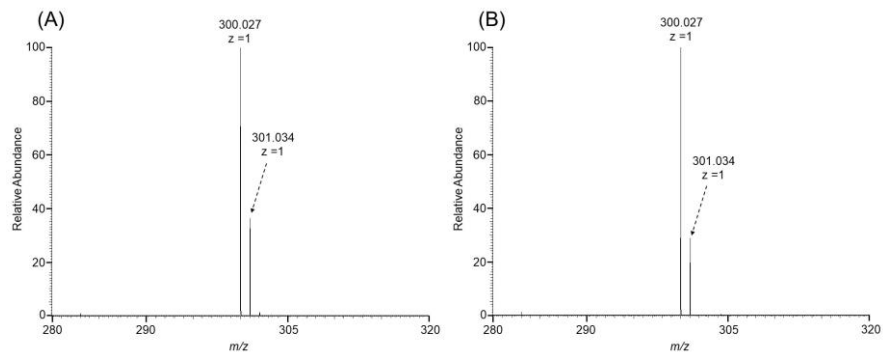

Figure S-38: Zoomed HCD fragmentation spectra for species present in amaranth that provide 300.027 and 301.034 product ions that could potentially interfere with the correct triggering of the ellagic acid 300.998 reporter ion without high resolution mass spectrometry: (A) rutin [M-H]<sup>-</sup>, (B) isoquercitrin [M-H]<sup>-</sup>.

**Figure S-39: CID Data Points, 466  $m/z$  – Screen Variants, T-3RT**

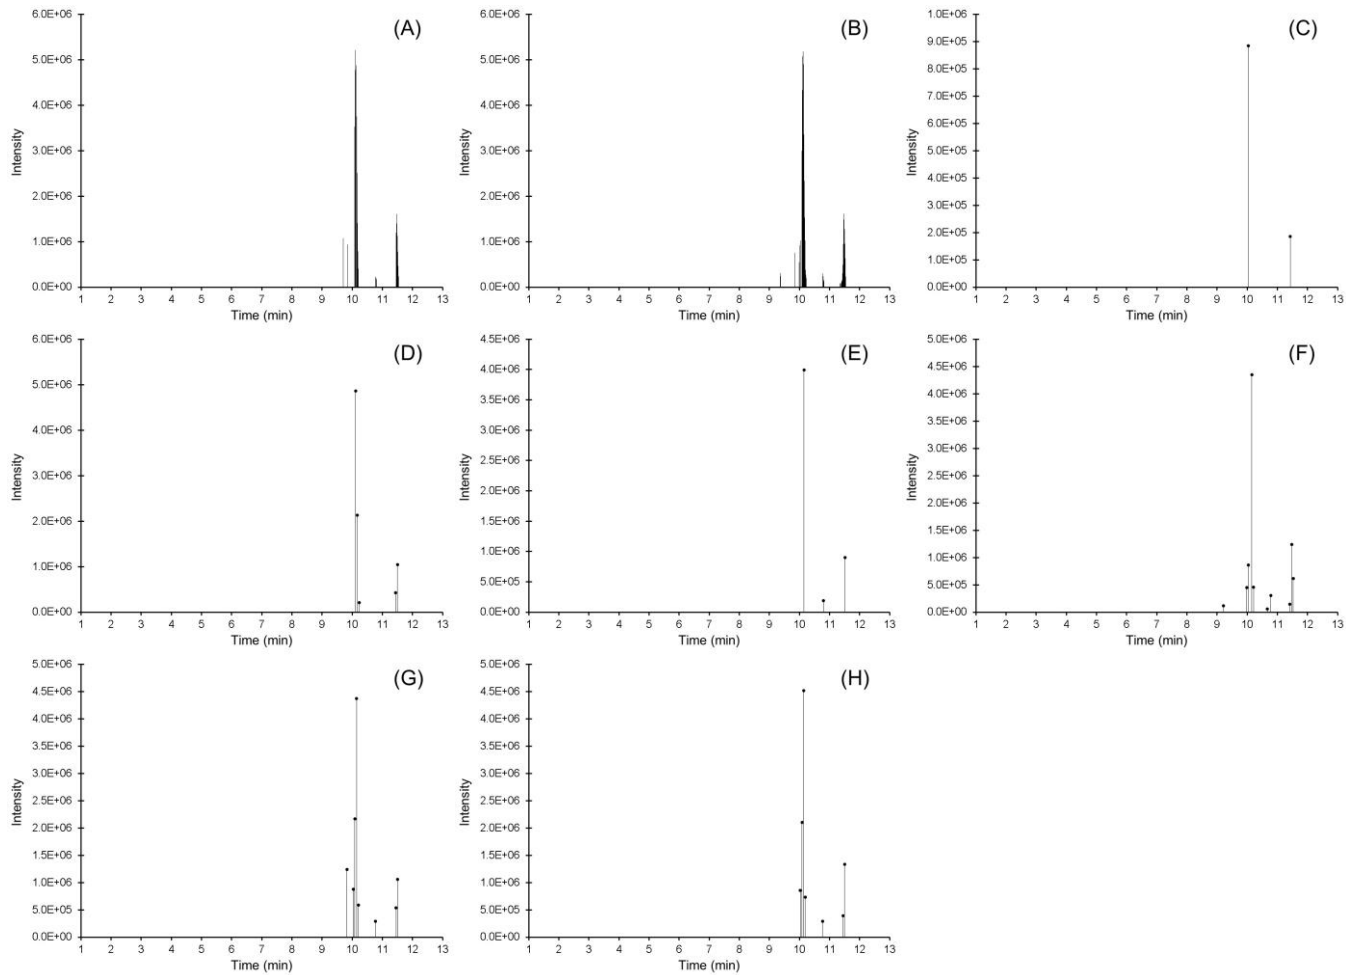

**Figure S-39:** Discrete CID data points for the 466 species present in strawberry observed under specific screen conditions as defined in Table 2 using T-3RT: (A) [I], (B) [III], (C) [IV], (D) [V], (E) [VI], (F) [VIII], (G) [IX], (H) [XI].

**Figure S-40: CID Data Points, 466  $m/z$  – Screen Variants, T-2RT**

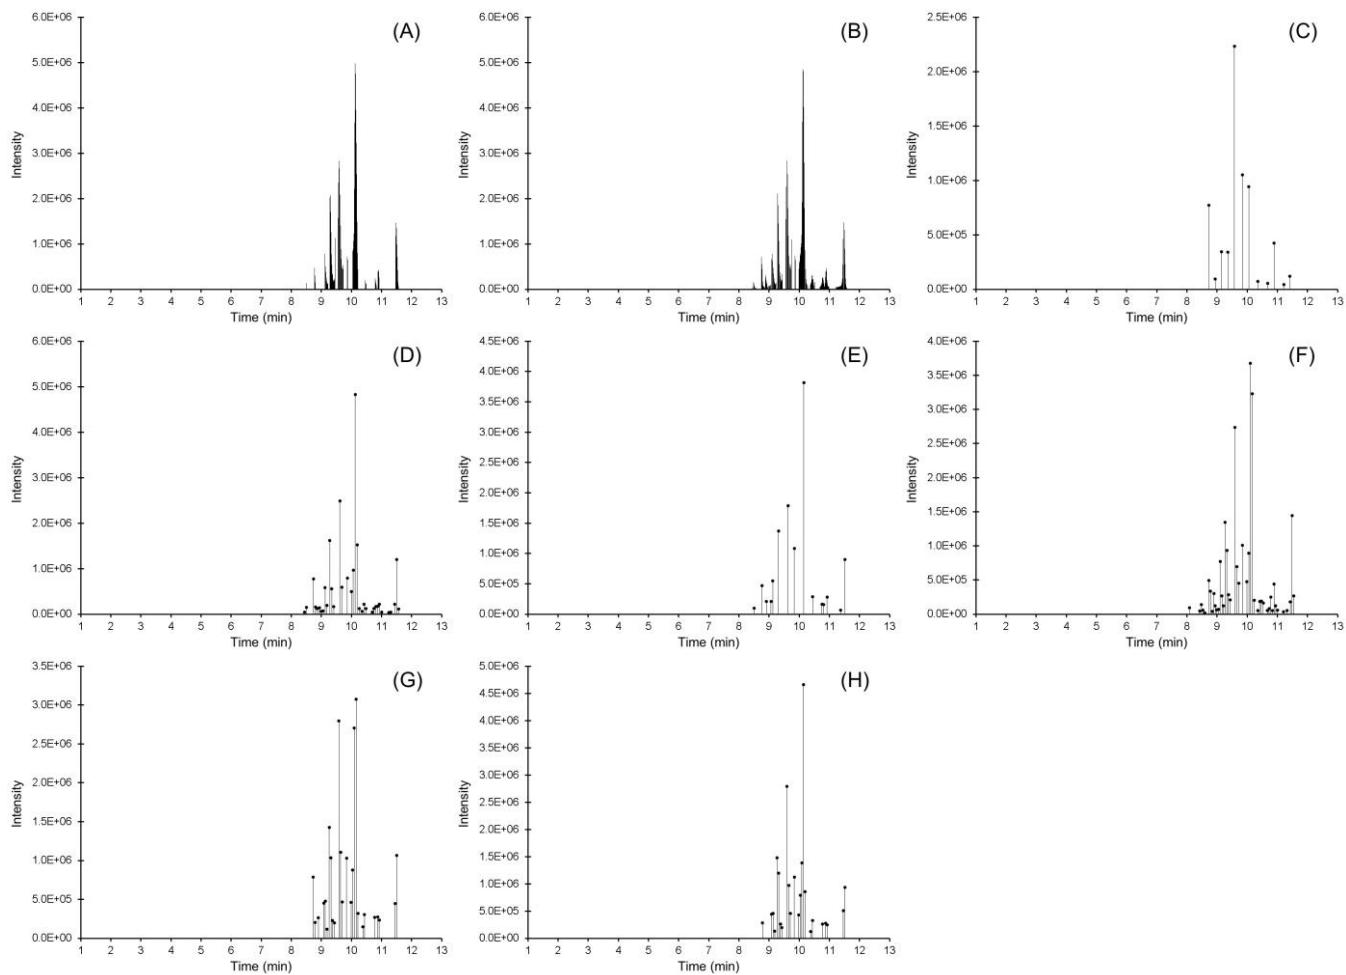

**Figure S-40:** Discrete CID data points for the 466 species present in strawberry observed under specific screen conditions as defined in Table 2 using T-2RT: (A) [I], (B) [III], (C) [IV], (D) [V], (E) [VI], (F) [VIII], (G) [IX], (H) [XI].

**Figure S-41: Proposed Structures – Ions of Interest**

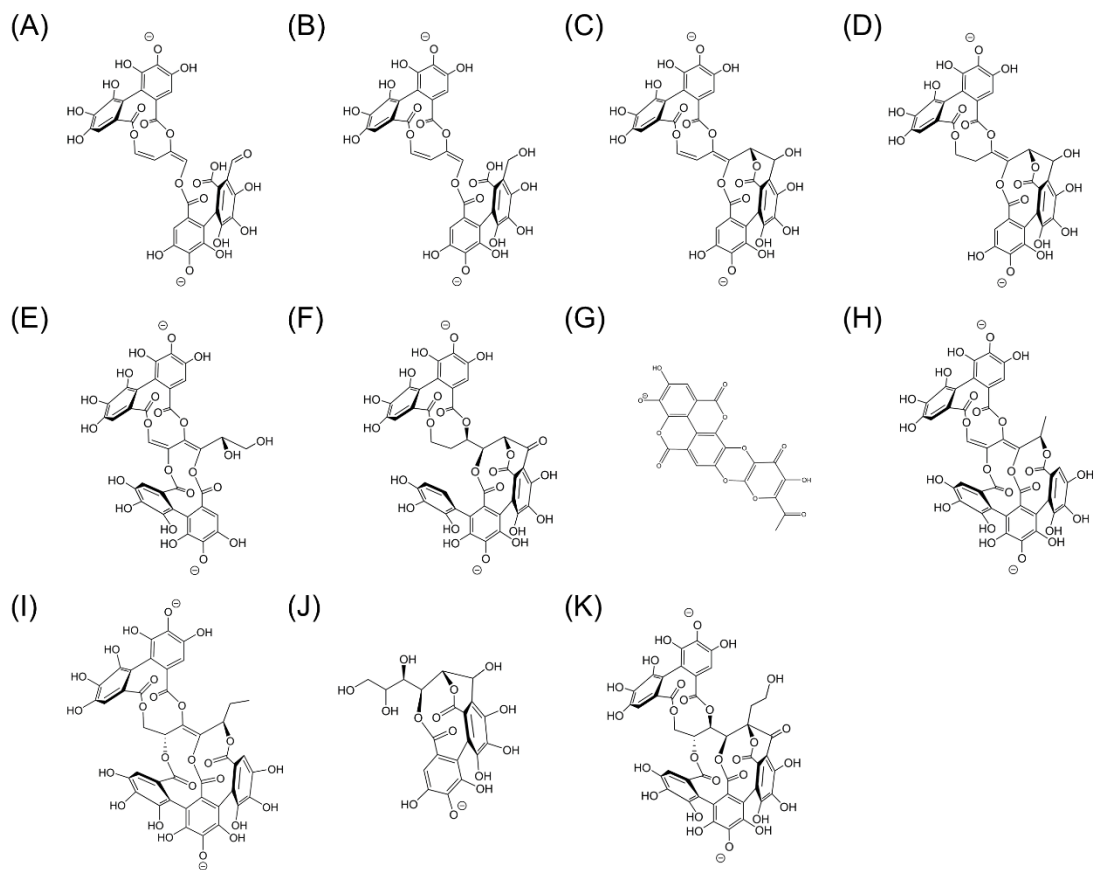

**Figure S-41:** Proposed even electron structures of significant ions of interest not used for classification of ellagitannins using the structure of standards as an initial point of reference with prioritization given to elemental compositions that were within  $\pm 0.002$  of observed values: (A) 375.017 obs., 375.018 calc.,  $z = 2$ ; (B) 376.024 obs., 376.025 calc.,  $z = 2$ ; (C) 381.017 obs., 381.018 calc.,  $z = 2$ ; (D) 382.025 obs., 381.025 calc.,  $z = 2$ ; (E) 390.022 obs., 390.023 calc.,  $z = 2$ ; (F) 444.033 obs., 444.033 calc.,  $z = 2$ ; (G) 450.993 obs., 450.994 calc.,  $z = 1$ ; (H) 457.023 obs., 457.023 calc.,  $z = 2$ ; (I) 465.038 obs., 465.039 calc.,  $z = 2$ ; (J) 481.061 obs., 481.062 calc.,  $z = 1$ ; (K) 487.035 obs., 487.034 calc.,  $z = 2$ .

## Supplementary Tables

**Table S-1: Precursor CID, 457 Major Product Ion**

MS/MS results from intact molecular ions with facile 457 formation.

| Standard Compound | [M-2H] <sup>2-</sup><br>( <i>m/z</i> ) | CID CE<br>(%) | 457.024<br>(rel.ab.) | 300.999<br>(rel.ab.) | 275.020<br>(rel.ab.) | 249.040<br>(rel.ab.) |
|-------------------|----------------------------------------|---------------|----------------------|----------------------|----------------------|----------------------|
| castalagin        | 466.029                                | 25            | 36.9                 | 100.0                | 49.4                 | 21.4                 |
| vescalagin        | 466.029                                | 25            | 100.0                | 6.7                  | 10.0                 | 5.5                  |
| acutissimin A     | 602.064                                | 20            | 100.0                | 1.6                  | 1.4                  | < 1.0                |
| epiacutissimin A  | 602.064                                | 15            | 100.0                | 1.2                  | < 1.0                | < 1.0                |

  

| Standard Compound | [M-3H] <sup>3-</sup><br>( <i>m/z</i> ) | CID CE<br>(%) | 457.024<br>(rel.ab.) | 300.999<br>(rel.ab.) | 275.020<br>(rel.ab.) | 249.040<br>(rel.ab.) |
|-------------------|----------------------------------------|---------------|----------------------|----------------------|----------------------|----------------------|
| roburin A         | 615.704                                | 20            | 100.0                | 5.8                  | 2.3                  | 2.0                  |
| roburin D         | 615.704                                | 18            | 100.0                | 9.0                  | 3.2                  | 2.5                  |
| roburin B/C       | 659.718                                | 16            | 57.5                 | 1.1                  | 1.3                  | < 1.0                |

**Table S-2: Precursor CID, 487 Major Product Ion**

MS/MS results from intact molecular ions with facile 487 formation.

| Standard Compound | [M-2H] <sup>2-</sup><br>( <i>m/z</i> ) | CID CE<br>(%) | 487.034<br>(rel.ab.) | 465.038<br>(rel.ab.) | 457.024<br>(rel.ab.) | 300.999<br>(rel.ab.) | 275.020<br>(rel.ab.) | 249.040<br>(rel.ab.) |
|-------------------|----------------------------------------|---------------|----------------------|----------------------|----------------------|----------------------|----------------------|----------------------|
| roburin E         | 532.050                                | 20            | 100.0                | 6.5                  | 4.8                  | 7.2                  | 4.2                  | 18.4                 |
| grandinin         | 532.050                                | 25            | 100.0                | 7.0                  | 7.7                  | 8.0                  | 6.3                  | 21.0                 |

**Table S-3: CID 457, MS<sup>3</sup>**

MS/MS results of 457 precursor isolated from MS/MS of intact molecular ion.

| Standard Compound | 300.999 (rel.ab.) | 275.020 (rel.ab.) | 249.040 (rel.ab.) |
|-------------------|-------------------|-------------------|-------------------|
| castalagin        | 79.4              | 100.0             | 49.8              |
| vescalagin        | 60.2              | 100.0             | 45.2              |
| acutissimin A     | 59.4              | 100.0             | 51.6              |
| epiacutissimin A  | 59.5              | 100.0             | 50.1              |
| roburin A         | 59.0              | 95.0              | 49.3              |
| roburin D         | 54.8              | 86.8              | 44.3              |
| roburin B/C       | 57.4              | 97.7              | 50.7              |

**Table S-4: CID 487, MS<sup>3</sup>**

MS/MS results of 487 precursor isolated from MS/MS of intact molecular ion.

| Standard Compound | 465.038 (rel.ab.) | 300.999 (rel.ab.) | 275.020 (rel.ab.) | 249.040 (rel.ab.) |
|-------------------|-------------------|-------------------|-------------------|-------------------|
| roburin E         | 100.0             | 24.9              | 30.3              | 86.0              |
| grandinin         | 100.0             | 31.9              | 37.9              | 99.8              |

**Table S-5: CID 465, MS<sup>4</sup>**

MS/MS results of 465 precursor isolated from MS/MS of isolated 487.

| Standard Compound | 300.999 (rel.ab.) | 275.020 (rel.ab.) | 249.040 (rel.ab.) |
|-------------------|-------------------|-------------------|-------------------|
| roburin E         | 27.4              | 26.0              | 16.6              |
| grandinin         | 24.6              | 23.5              | 14.1              |



**Table S-6:  $\Sigma$  (249, 275, 301) Intensities, Discrete HCD Series**

Normalized sums of 249 / 275 / 301 intensities for discrete NCE values.

| Standard Compound | 0   | 5   | 10  | 15   | 20   | 25   | 30   | 35   | 40   | 50   | 60   | 70   |
|-------------------|-----|-----|-----|------|------|------|------|------|------|------|------|------|
| castalagin        | 0.4 | 0.8 | 2.4 | 9.8  | 34.1 | 73.4 | 97.7 | 100  | 96.7 | 66.5 | 43.4 | 24.9 |
| vescalagin        | 0.4 | 1   | 2.9 | 12.8 | 47.8 | 87.5 | 100  | 98.9 | 85   | 60.1 | 38.5 | 20.6 |
| acutissimin A     | 0.1 | 0.3 | 1.1 | 4.8  | 17.6 | 41.2 | 75.5 | 95.8 | 100  | 87.6 | 67.6 | 44.4 |
| epiacutissimin A  | 0.2 | 0.4 | 1.2 | 5.3  | 19.2 | 47.9 | 81.5 | 100  | 97.5 | 82.1 | 55.9 | 34.7 |
| roburin A         | 0   | 0   | 0   | 3    | 24.1 | 57.4 | 84.4 | 100  | 96.9 | 87.7 | 59.7 | 41.5 |
| roburin D         | 0   | 0   | 0.1 | 2.9  | 22.4 | 49.8 | 75.1 | 88.4 | 100  | 94.7 | 67.1 | 38.4 |
| roburin B/C       | 0   | 0   | 0   | 2.1  | 17.4 | 45   | 70.9 | 88.6 | 100  | 87.6 | 61   | 35.8 |
| grandinin         | 0.5 | 1.1 | 3.6 | 15.7 | 45.2 | 82.2 | 100  | 96.8 | 86.6 | 60.5 | 36.3 | 20.5 |
| roburin E         | 0.4 | 1.2 | 6.1 | 30.2 | 71.9 | 100  | 95.6 | 85.8 | 68.9 | 40.8 | 20.7 | 9.4  |

**Table S-7:  $\Sigma$  (249, 275, 301) Intensities, Theoretical Stepped (+/-10) HCD Series**

Theoretical normalized sums of 249 / 275 / 301 intensities for NCE values stepped by +/-10.

| Standard Compound | 10 +/- 10 | 20 +/- 10 | 30 +/- 10 | 40 +/- 10 | 50 +/- 10 | 60 +/- 10 |
|-------------------|-----------|-----------|-----------|-----------|-----------|-----------|
| castalagin        | 14.1      | 51.4      | 87.6      | 100       | 79.2      | 51.7      |
| vescalagin        | 20.8      | 61.5      | 95        | 100       | 74.9      | 48.6      |
| acutissimin A     | 7.2       | 35.8      | 73.4      | 100       | 97        | 75.9      |
| epiacutissimin A  | 7.9       | 39        | 75.9      | 100       | 90.2      | 66.2      |
| roburin A         | 9         | 40.3      | 76.4      | 100       | 90.8      | 70.2      |
| roburin D         | 8.3       | 36.2      | 73.2      | 100       | 97        | 74.2      |
| roburin B/C       | 6.7       | 34.1      | 72.8      | 100       | 96.2      | 71.4      |
| grandinin         | 19.9      | 60.2      | 93.8      | 100       | 74.2      | 47.5      |
| roburin E         | 33.2      | 73.5      | 100       | 86.9      | 55.2      | 30        |
| $\bar{x}$         | 14.12     | 48.00     | 83.12     | 98.54     | 83.86     | 59.52     |
| $\sigma$          | 8.97      | 14.21     | 10.94     | 4.37      | 14.15     | 15.73     |

**Table S-8:  $\Sigma$  (249, 275, 301) Intensities, Stepped HCD Series**

Normalized sums of 249 / 275 / 301 intensities for NCE values stepped by +/-10 and +/-5.

| Standard Compound | 25 +/- 10 | 30 +/-10 | 35 +/-10 | 40 +/-10 | 45 +/-10 | 25 +/- 5 | 30 +/-5 | 35 +/-5 | 40 +/-5 | 45 +/-5 |
|-------------------|-----------|----------|----------|----------|----------|----------|---------|---------|---------|---------|
| castalagin        | 59.4      | 75.1     | 86.7     | 91       | 82.5     | 61.4     | 88.5    | 100     | 95.4    | 84.2    |
| vescalagin        | 64.1      | 77.5     | 88.4     | 92.6     | 77.5     | 71.3     | 94.7    | 100     | 98.6    | 84.8    |
| acutissimin A     | 46.3      | 64.2     | 77.3     | 89       | 91.1     | 45.7     | 72.7    | 100     | 96.2    | 97.5    |
| epiacutissimin A  | 48.3      | 65.6     | 79.5     | 87.4     | 93.3     | 46.4     | 78.5    | 100     | 96.8    | 95.5    |
| roburin A         | 53.1      | 71.6     | 89.7     | 81.9     | 90.4     | 50.5     | 81.2    | 100     | 99.3    | 95.2    |
| roburin D         | 46.9      | 65.9     | 82.5     | 90.6     | 93.8     | 48.9     | 71.9    | 86      | 100     | 98.5    |
| roburin B/C       | 57.8      | 76.1     | 92.3     | 94.3     | 85.5     | 62.7     | 89      | 100     | 99.9    | 90.6    |
| grandinin         | 56.3      | 78.8     | 86.2     | 87.9     | 76.1     | 68.8     | 90      | 100     | 96.3    | 83.2    |
| roburin E         | 57.9      | 70.8     | 81.9     | 82.1     | 83.1     | 63.1     | 79.9    | 94.2    | 100     | 77      |
| $\bar{x}$         | 54.46     | 71.73    | 84.94    | 88.53    | 85.92    | 57.64    | 82.93   | 97.8    | 98.06   | 89.61   |
| $\sigma$          | 6.2       | 5.51     | 4.96     | 4.29     | 6.62     | 9.85     | 8.02    | 4.82    | 1.87    | 7.59    |

**Table S-9: Strawberry, Screen [I], T-3RT**

Precursor ions present in strawberry leaves classified as ellagitannins under condition [I] using T-3RT.

| No. | Scan No.  | <i>m/z</i> | Z | Mass     | RT (s)  | Intensity |
|-----|-----------|------------|---|----------|---------|-----------|
| 1   | 2560-4342 | 391.031    | 2 | 784.078  | 248-418 | 1.30E+06  |
| 2   | 3200-5536 | 453.039    | 2 | 908.094  | 308-530 | 7.48E+05  |
| 3   | 5321-7222 | 466.029    | 2 | 934.074  | 509-692 | 3.33E+06  |
| 4   | 6083-6651 | 467.036    | 2 | 936.089  | 583-637 | 3.62E+06  |
| 5   | 4590-4591 | 469.052    | 2 | 940.120  | 442-442 | 1.32E+05  |
| 6   | 3047-5434 | 475.034    | 2 | 952.084  | 294-520 | 6.14E+05  |
| 7   | 5300-5302 | 476.041    | 2 | 954.099  | 508-508 | 1.48E+05  |
| 8   | 1113-1525 | 481.064    | 1 | 482.072  | 110-149 | 4.53E+06  |
| 9   | 5208-6474 | 482.042    | 2 | 966.099  | 499-620 | 1.30E+06  |
| 10  | 2599-4289 | 491.029    | 2 | 984.073  | 252-414 | 3.15E+05  |
| 11  | 6961-7639 | 542.035    | 2 | 1086.086 | 667-733 | 1.47E+06  |
| 12  | 6561-7534 | 558.048    | 2 | 1118.111 | 628-723 | 4.84E+05  |
| 13  | 5319-5353 | 632.066    | 2 | 1266.148 | 509-513 | 8.74E+05  |
| 14  | 1753-5204 | 633.074    | 1 | 634.082  | 172-498 | 1.60E+06  |
| 15  | 1132-1140 | 637.067    | 1 | 638.075  | 112-113 | 7.00E+05  |
| 16  | 1603-2017 | 649.069    | 1 | 650.077  | 157-197 | 7.27E+05  |
| 17  | 4150-4772 | 663.084    | 1 | 664.092  | 401-459 | 3.59E+05  |
| 18  | 4746-4999 | 707.065    | 2 | 1416.146 | 457-479 | 1.73E+06  |
| 19  | 4849-4944 | 718.054    | 2 | 1438.125 | 466-474 | 1.01E+06  |
| 20  | 4754-4757 | 723.077    | 2 | 1448.170 | 458-458 | 1.73E+05  |
| 21  | 2295-4786 | 783.070    | 1 | 784.078  | 223-460 | 8.03E+05  |
| 22  | 5880-6060 | 783.070    | 2 | 1568.156 | 563-581 | 2.98E+06  |
| 23  | 4793-4795 | 785.085    | 1 | 786.093  | 461-461 | 2.37E+05  |
| 24  | 2552-2732 | 805.051    | 1 | 806.059  | 247-264 | 1.92E+05  |
| 25  | 2251-2426 | 815.095    | 1 | 816.103  | 220-235 | 3.23E+05  |
| 26  | 2813-4306 | 851.057    | 1 | 852.065  | 272-415 | 3.69E+05  |
| 27  | 4947-5827 | 858.068    | 2 | 1718.151 | 475-559 | 1.09E+06  |
| 28  | 6004-6031 | 874.080    | 2 | 1750.177 | 575-578 | 1.14E+06  |
| 29  | 6363-6600 | 934.074    | 2 | 1870.164 | 609-632 | 6.09E+06  |
| 30  | 6084-6150 | 935.080    | 1 | 936.088  | 583-589 | 1.09E+06  |
| 31  | 6371-6412 | 945.063    | 2 | 1892.141 | 610-614 | 1.40E+06  |
| 32  | 2981-5452 | 951.075    | 1 | 952.083  | 287-522 | 4.46E+05  |
| 33  | 5216-6478 | 965.091    | 1 | 966.099  | 499-620 | 6.11E+05  |

**Table S-10: Strawberry, Screen [II], T-3RT**

Precursor ions present in strawberry leaves classified as ellagitannins under condition [II] using T-3RT.

| <b>No.</b> | <b>Scan No.</b> | <b><i>m/z</i></b> | <b>Z</b> | <b>Mass</b> | <b>RT (s)</b> | <b>Intensity</b> |
|------------|-----------------|-------------------|----------|-------------|---------------|------------------|
| 1          | 1113-1518       | 481.064           | 1        | 482.072     | 110-149       | 4.65E+06         |
| 2          | 1131-1140       | 637.067           | 1        | 638.075     | 112-113       | 5.20E+05         |
| 3          | 1673-1988       | 649.068           | 1        | 650.076     | 164-195       | 7.68E+05         |
| 4          | 1734-5186       | 633.074           | 1        | 634.082     | 170-499       | 1.33E+06         |
| 5          | 2217-2414       | 815.095           | 1        | 816.103     | 218-236       | 2.97E+05         |
| 6          | 2258-4762       | 783.069           | 1        | 784.077     | 222-460       | 6.96E+05         |
| 7          | 2543-4267       | 805.051           | 1        | 806.059     | 248-413       | 1.95E+05         |
| 8          | 2837-4299       | 851.056           | 1        | 852.064     | 275-416       | 3.78E+05         |
| 9          | 2995-6119       | 951.075           | 1        | 952.083     | 290-588       | 4.13E+05         |
| 10         | 4136-4755       | 663.084           | 1        | 664.092     | 402-460       | 3.74E+05         |
| 11         | 4767-5419       | 785.085           | 1        | 786.093     | 461-522       | 2.71E+05         |
| 12         | 5185-6468       | 965.091           | 1        | 966.099     | 499-620       | 5.90E+05         |
| 13         | 5653-7212       | 933.065           | 1        | 934.073     | 544-692       | 2.00E+06         |
| 14         | 6053-6114       | 935.080           | 1        | 936.088     | 583-588       | 1.23E+06         |

**Table S-11: Strawberry, Screen [III], T-3RT**

Precursor ions present in strawberry leaves classified as ellagitannins under condition [III] using T-3RT.

| No. | Scan No.  | <i>m/z</i> | Z | Mass     | RT (s)  | Intensity |
|-----|-----------|------------|---|----------|---------|-----------|
| 1   | 595-5386  | 391.031    | 2 | 784.077  | 165-681 | 5.92E+05  |
| 2   | 3086-3730 | 392.039    | 2 | 786.093  | 460-523 | 1.81E+05  |
| 3   | 988-1205  | 407.044    | 2 | 816.103  | 222-244 | 1.89E+05  |
| 4   | 2626-2663 | 425.025    | 2 | 852.065  | 413-416 | 1.42E+05  |
| 5   | 1757-4237 | 453.039    | 2 | 908.094  | 308-570 | 6.30E+05  |
| 6   | 3309-5529 | 466.029    | 2 | 934.073  | 481-694 | 1.54E+06  |
| 7   | 4364-4947 | 467.036    | 2 | 936.089  | 583-637 | 3.68E+06  |
| 8   | 2892-5372 | 469.052    | 2 | 940.120  | 440-680 | 3.23E+05  |
| 9   | 1551-4843 | 475.034    | 2 | 952.083  | 284-627 | 3.35E+05  |
| 10  | 3513-5074 | 476.041    | 2 | 954.098  | 503-649 | 1.43E+05  |
| 11  | 3460-4951 | 482.042    | 2 | 966.099  | 497-637 | 6.90E+05  |
| 12  | 1259-2675 | 491.028    | 2 | 984.073  | 250-417 | 2.30E+05  |
| 13  | 1007-3003 | 491.048    | 2 | 984.111  | 224-451 | 1.16E+05  |
| 14  | 4199-4242 | 498.055    | 2 | 998.126  | 567-570 | 2.87E+05  |
| 15  | 3855-4225 | 541.055    | 2 | 1084.126 | 535-569 | 2.07E+05  |
| 16  | 3349-5922 | 542.034    | 2 | 1086.085 | 485-755 | 8.40E+05  |
| 17  | 3426-3449 | 549.053    | 2 | 1100.122 | 494-496 | 1.18E+05  |
| 18  | 4842-5717 | 558.047    | 2 | 1118.111 | 627-723 | 3.71E+05  |
| 19  | 3413-3448 | 563.050    | 2 | 1128.117 | 492-496 | 1.19E+05  |
| 20  | 3574-3637 | 632.066    | 2 | 1266.148 | 509-515 | 6.67E+05  |
| 21  | 2551-3907 | 707.065    | 2 | 1416.145 | 405-540 | 1.00E+06  |
| 22  | 3050-3921 | 723.077    | 2 | 1448.170 | 456-541 | 1.61E+05  |
| 23  | 3456-4614 | 783.070    | 2 | 1568.155 | 497-606 | 9.82E+05  |
| 24  | 3467-3556 | 791.067    | 2 | 1584.149 | 498-507 | 1.29E+05  |
| 25  | 3234-5092 | 858.067    | 2 | 1718.151 | 474-651 | 5.52E+05  |
| 26  | 3779-4324 | 874.080    | 2 | 1750.176 | 528-579 | 7.99E+05  |
| 27  | 4163-4194 | 878.063    | 2 | 1758.141 | 563-566 | 4.37E+05  |
| 28  | 4520-4895 | 934.074    | 2 | 1870.163 | 597-632 | 6.09E+06  |
| 29  | 4482-4899 | 945.062    | 2 | 1892.140 | 594-632 | 9.73E+05  |

**Table S-12: Strawberry, Screen [IV], T-3RT**

Precursor ions present in strawberry leaves classified as ellagitannins under condition [IV] using T-3RT.

| No. | Scan No.  | <i>m/z</i> | Z | Mass     | RT (s)  | Intensity |
|-----|-----------|------------|---|----------|---------|-----------|
| 1   | 3021-3762 | 392.039    | 2 | 786.093  | 508-588 | 1.51E+05  |
| 2   | 1795-3553 | 453.039    | 2 | 908.094  | 309-567 | 3.62E+05  |
| 3   | 2809-4671 | 466.029    | 2 | 934.074  | 481-685 | 1.27E+06  |
| 4   | 3798-4188 | 467.036    | 2 | 936.088  | 592-631 | 1.14E+06  |
| 5   | 1680-4127 | 475.034    | 2 | 952.084  | 285-625 | 2.78E+05  |
| 6   | 630-932   | 481.064    | 1 | 482.072  | 110-154 | 6.37E+06  |
| 7   | 2469-4181 | 482.042    | 2 | 966.099  | 435-631 | 4.52E+05  |
| 8   | 3368-3548 | 498.055    | 2 | 998.126  | 546-566 | 9.73E+04  |
| 9   | 3252-3589 | 541.055    | 2 | 1084.126 | 533-570 | 1.02E+05  |
| 10  | 648-828   | 549.050    | 1 | 550.058  | 112-142 | 1.52E+05  |
| 11  | 3612-4217 | 551.040    | 2 | 1104.096 | 572-634 | 6.26E+05  |
| 12  | 635-636   | 566.041    | 1 | 567.049  | 111-111 | 2.71E+05  |
| 13  | 4021-4927 | 594.076    | 2 | 1190.168 | 613-716 | 9.11E+04  |
| 14  | 3067-4014 | 616.090    | 2 | 1234.195 | 513-613 | 1.04E+05  |
| 15  | 1044-3827 | 633.073    | 1 | 634.081  | 170-594 | 2.16E+05  |
| 16  | 640-643   | 637.067    | 1 | 638.075  | 111-111 | 5.03E+05  |
| 17  | 646-1166  | 649.069    | 1 | 650.077  | 112-190 | 6.23E+05  |
| 18  | 2232-2618 | 663.084    | 1 | 664.092  | 398-455 | 1.14E+05  |
| 19  | 3840-3841 | 673.124    | 2 | 1348.263 | 596-596 | 6.55E+04  |
| 20  | 847-848   | 687.046    | 1 | 688.054  | 143-144 | 4.33E+05  |
| 21  | 2273-3214 | 707.064    | 2 | 1416.144 | 405-530 | 4.10E+05  |
| 22  | 1007-3973 | 783.070    | 1 | 784.078  | 164-609 | 5.30E+05  |
| 23  | 2922-3944 | 783.070    | 2 | 1568.156 | 494-606 | 7.49E+05  |
| 24  | 2657-3758 | 785.085    | 1 | 786.093  | 461-587 | 2.06E+05  |
| 25  | 2713-2945 | 791.067    | 2 | 1584.150 | 468-497 | 7.03E+04  |
| 26  | 2693-3640 | 799.064    | 1 | 800.072  | 465-575 | 9.14E+04  |
| 27  | 886-3168  | 801.080    | 1 | 802.088  | 147-524 | 9.59E+04  |
| 28  | 1479-2315 | 805.051    | 1 | 806.059  | 247-412 | 7.88E+04  |
| 29  | 1316-1459 | 815.095    | 1 | 816.103  | 219-244 | 1.50E+05  |
| 30  | 2750-4364 | 858.067    | 2 | 1718.150 | 473-651 | 5.65E+05  |
| 31  | 1616-2316 | 873.038    | 1 | 874.046  | 273-412 | 7.26E+04  |
| 32  | 3192-3633 | 874.080    | 2 | 1750.176 | 527-574 | 2.14E+05  |
| 33  | 4008-4532 | 917.164    | 1 | 918.172  | 612-669 | 8.38E+04  |
| 34  | 3854-4169 | 934.073    | 2 | 1870.162 | 597-630 | 3.00E+06  |
| 35  | 3708-3711 | 935.080    | 1 | 936.088  | 583-583 | 3.35E+05  |
| 36  | 3800-4240 | 937.088    | 1 | 938.096  | 592-637 | 8.92E+04  |

|    |           |          |   |          |         |          |
|----|-----------|----------|---|----------|---------|----------|
| 37 | 1685-4125 | 951.075  | 1 | 952.083  | 286-625 | 2.34E+05 |
| 38 | 647-855   | 963.133  | 1 | 964.141  | 112-144 | 2.43E+05 |
| 39 | 2950-4202 | 965.091  | 1 | 966.099  | 498-633 | 2.44E+05 |
| 40 | 1403-1405 | 983.103  | 1 | 984.111  | 234-234 | 5.32E+04 |
| 41 | 3624-4222 | 1018.076 | 2 | 2038.168 | 573-635 | 1.39E+05 |
| 42 | 3628-3631 | 1103.086 | 1 | 1104.094 | 574-574 | 1.89E+05 |
| 43 | 3995-3997 | 1149.163 | 2 | 2300.342 | 611-611 | 8.79E+04 |

**Table S-13: Strawberry, Screen [V], T-3RT**

Precursor ions present in strawberry leaves classified as ellagitannins under condition [V] using T-3RT.

| No. | Scan No.  | <i>m/z</i> | Z | Mass     | RT (s)  | Intensity |
|-----|-----------|------------|---|----------|---------|-----------|
| 1   | 1323-5329 | 391.031    | 2 | 784.078  | 166-617 | 4.93E+05  |
| 2   | 3721-5018 | 392.039    | 2 | 786.093  | 462-588 | 1.66E+05  |
| 3   | 1761-1945 | 407.044    | 2 | 816.103  | 222-242 | 1.68E+05  |
| 4   | 2478-4807 | 453.039    | 2 | 908.094  | 309-568 | 5.54E+05  |
| 5   | 3919-6107 | 466.029    | 2 | 934.074  | 482-693 | 1.75E+06  |
| 6   | 4973-5514 | 467.036    | 2 | 936.088  | 583-635 | 2.56E+06  |
| 7   | 2301-5414 | 475.034    | 2 | 952.084  | 285-625 | 3.35E+05  |
| 8   | 4141-5657 | 476.041    | 2 | 954.099  | 504-649 | 1.49E+05  |
| 9   | 5374-5534 | 477.050    | 2 | 956.115  | 622-637 | 1.41E+05  |
| 10  | 809-1212  | 481.063    | 1 | 482.071  | 110-155 | 2.77E+06  |
| 11  | 3476-5524 | 482.042    | 2 | 966.099  | 436-636 | 5.31E+05  |
| 12  | 2027-3310 | 491.028    | 2 | 984.073  | 251-418 | 1.76E+05  |
| 13  | 4795-4838 | 498.055    | 2 | 998.126  | 567-571 | 1.51E+05  |
| 14  | 4539-4806 | 541.055    | 2 | 1084.126 | 543-568 | 1.64E+05  |
| 15  | 3946-6735 | 542.034    | 2 | 1086.085 | 485-756 | 7.05E+05  |
| 16  | 829-1122  | 549.050    | 1 | 550.058  | 112-145 | 2.39E+05  |
| 17  | 5419-6383 | 558.047    | 2 | 1118.111 | 626-721 | 1.99E+05  |
| 18  | 1328-1554 | 605.079    | 1 | 606.087  | 167-195 | 9.36E+04  |
| 19  | 1360-4105 | 633.074    | 1 | 634.082  | 171-500 | 8.98E+05  |
| 20  | 819-821   | 637.067    | 1 | 638.075  | 111-111 | 4.29E+05  |
| 21  | 825-1572  | 649.068    | 1 | 650.076  | 112-197 | 3.79E+05  |
| 22  | 3125-3691 | 663.084    | 1 | 664.092  | 398-459 | 2.82E+05  |
| 23  | 1104-1107 | 665.064    | 1 | 666.072  | 144-144 | 4.05E+05  |
| 24  | 5067-5070 | 675.121    | 2 | 1352.258 | 593-593 | 9.98E+04  |
| 25  | 1103-1106 | 687.046    | 1 | 688.054  | 144-144 | 4.36E+05  |
| 26  | 3196-4484 | 707.065    | 2 | 1416.145 | 405-537 | 7.81E+05  |
| 27  | 4422-4425 | 716.069    | 2 | 1434.154 | 531-532 | 9.70E+04  |
| 28  | 3668-4531 | 723.077    | 2 | 1448.170 | 456-542 | 1.27E+05  |
| 29  | 3940-5446 | 782.061    | 2 | 1566.139 | 484-629 | 1.70E+05  |
| 30  | 1310-5258 | 783.069    | 1 | 784.077  | 165-611 | 4.28E+05  |
| 31  | 4056-5161 | 783.070    | 2 | 1568.156 | 495-602 | 9.11E+05  |
| 32  | 3710-4363 | 785.084    | 1 | 786.092  | 461-526 | 1.51E+05  |
| 33  | 3757-4538 | 799.064    | 1 | 800.072  | 465-542 | 1.11E+05  |
| 34  | 1154-3990 | 801.080    | 1 | 802.088  | 148-489 | 1.00E+05  |
| 35  | 1993-3256 | 805.051    | 1 | 806.059  | 247-412 | 1.38E+05  |
| 36  | 1735-1963 | 815.095    | 1 | 816.103  | 219-244 | 2.36E+05  |



|    |           |          |   |          |         |          |
|----|-----------|----------|---|----------|---------|----------|
| 37 | 1753-2062 | 831.090  | 1 | 832.098  | 221-255 | 9.29E+04 |
| 38 | 2196-3308 | 851.057  | 1 | 852.065  | 272-417 | 3.56E+05 |
| 39 | 3838-5392 | 858.067  | 2 | 1718.151 | 473-623 | 5.34E+05 |
| 40 | 4745-4785 | 867.072  | 2 | 1736.161 | 562-566 | 7.52E+05 |
| 41 | 4398-4922 | 874.080  | 2 | 1750.176 | 529-578 | 4.71E+05 |
| 42 | 4974-5017 | 935.080  | 1 | 936.088  | 583-588 | 7.49E+05 |
| 43 | 5058-5502 | 937.087  | 1 | 938.095  | 592-634 | 1.18E+05 |
| 44 | 5076-5468 | 945.063  | 2 | 1892.141 | 594-631 | 5.93E+05 |
| 45 | 2311-5420 | 951.075  | 1 | 952.083  | 286-626 | 3.04E+05 |
| 46 | 824-1114  | 963.133  | 1 | 964.141  | 112-145 | 2.34E+05 |
| 47 | 4090-5344 | 965.091  | 1 | 966.099  | 499-619 | 2.24E+05 |
| 48 | 4876-4970 | 1103.087 | 1 | 1104.095 | 574-583 | 1.95E+05 |

**Table S-14: Strawberry, Screen [VI], T-3RT**

Precursor ions present in strawberry leaves classified as ellagitannins under condition [VI] using T-3RT.

| No. | Scan No.  | <i>m/z</i> | Z | Mass     | RT (s)  | Intensity |
|-----|-----------|------------|---|----------|---------|-----------|
| 1   | 2431-3409 | 392.039    | 2 | 786.093  | 462-590 | 1.89E+05  |
| 2   | 1174-1274 | 407.044    | 2 | 816.103  | 226-244 | 1.99E+05  |
| 3   | 1623-3251 | 453.039    | 2 | 908.094  | 312-571 | 7.83E+05  |
| 4   | 2578-4192 | 466.029    | 2 | 934.074  | 484-690 | 2.85E+06  |
| 5   | 3374-3790 | 467.036    | 2 | 936.089  | 586-635 | 5.55E+06  |
| 6   | 2308-4117 | 469.052    | 2 | 940.120  | 443-678 | 3.23E+05  |
| 7   | 1511-3722 | 475.034    | 2 | 952.083  | 289-627 | 4.68E+05  |
| 8   | 543-721   | 481.064    | 1 | 482.072  | 112-144 | 1.61E+07  |
| 9   | 2268-3769 | 482.042    | 2 | 966.099  | 438-633 | 8.31E+05  |
| 10  | 1171-2316 | 491.048    | 2 | 984.112  | 226-444 | 9.81E+04  |
| 11  | 3231-3232 | 498.055    | 2 | 998.126  | 569-569 | 2.88E+05  |
| 12  | 2953-3227 | 541.055    | 2 | 1084.126 | 535-569 | 1.99E+05  |
| 13  | 546-713   | 549.051    | 1 | 550.059  | 112-144 | 2.44E+05  |
| 14  | 3711-4418 | 558.047    | 2 | 1118.111 | 626-724 | 3.08E+05  |
| 15  | 2769-2771 | 632.066    | 2 | 1266.148 | 512-512 | 6.11E+05  |
| 16  | 910-2685  | 633.074    | 1 | 634.082  | 175-499 | 2.12E+06  |
| 17  | 558-1032  | 649.068    | 1 | 650.076  | 113-196 | 5.92E+05  |
| 18  | 2058-2417 | 663.084    | 1 | 664.092  | 402-459 | 3.30E+05  |
| 19  | 2096-2986 | 707.065    | 2 | 1416.145 | 408-539 | 9.00E+05  |
| 20  | 2416-2478 | 718.054    | 2 | 1438.125 | 459-468 | 4.61E+05  |
| 21  | 2415-3017 | 723.077    | 2 | 1448.170 | 459-543 | 1.50E+05  |
| 22  | 870-2331  | 783.069    | 1 | 784.077  | 168-447 | 5.66E+05  |
| 23  | 2430-2858 | 785.084    | 1 | 786.092  | 462-524 | 2.55E+05  |
| 24  | 2482-3315 | 799.064    | 1 | 800.072  | 468-578 | 1.03E+05  |
| 25  | 992-2614  | 801.079    | 1 | 802.087  | 188-490 | 6.77E+04  |
| 26  | 1162-1231 | 815.095    | 1 | 816.103  | 225-236 | 4.31E+05  |
| 27  | 1442-2132 | 851.056    | 1 | 852.064  | 276-416 | 3.65E+05  |
| 28  | 2532-3707 | 858.067    | 2 | 1718.150 | 477-625 | 8.45E+05  |
| 29  | 3375-3379 | 935.080    | 1 | 936.088  | 586-587 | 1.66E+06  |
| 30  | 3797-3800 | 937.089    | 1 | 938.097  | 636-636 | 7.06E+04  |
| 31  | 1516-3723 | 951.075    | 1 | 952.083  | 290-627 | 4.20E+05  |
| 32  | 1188-3600 | 956.052    | 2 | 1914.119 | 229-612 | 2.44E+05  |
| 33  | 719-722   | 963.133    | 1 | 964.141  | 144-145 | 1.18E+05  |
| 34  | 2693-3772 | 965.091    | 1 | 966.099  | 501-633 | 3.26E+05  |

**Table S-15: Strawberry, Screen [VII], T-3RT**

Precursor ions present in strawberry leaves classified as ellagitannins under condition [VII] using T-3RT.

| <b>No.</b> | <b>Scan No.</b> | <b><i>m/z</i></b> | <b>Z</b> | <b>Mass</b> | <b>RT (s)</b> | <b>Intensity</b> |
|------------|-----------------|-------------------|----------|-------------|---------------|------------------|
| 1          | 807-1194        | 481.064           | 1        | 482.072     | 110-154       | 4.21E+06         |
| 2          | 832-1118        | 549.050           | 1        | 550.058     | 113-146       | 1.52E+05         |
| 3          | 812-813         | 566.041           | 1        | 567.049     | 111-111       | 2.79E+05         |
| 4          | 1356-3837       | 633.074           | 1        | 634.082     | 172-501       | 7.49E+05         |
| 5          | 818-820         | 637.067           | 1        | 638.075     | 112-112       | 5.02E+05         |
| 6          | 823-1567        | 649.068           | 1        | 650.076     | 112-199       | 4.10E+05         |
| 7          | 2977-3473       | 663.084           | 1        | 664.092     | 399-460       | 2.51E+05         |
| 8          | 1098-1099       | 687.046           | 1        | 688.054     | 144-144       | 4.40E+05         |
| 9          | 1306-4901       | 783.069           | 1        | 784.077     | 166-609       | 4.34E+05         |
| 10         | 3492-4683       | 785.085           | 1        | 786.093     | 462-588       | 1.92E+05         |
| 11         | 3528-4571       | 799.064           | 1        | 800.072     | 465-576       | 1.08E+05         |
| 12         | 1155-4078       | 801.080           | 1        | 802.088     | 149-526       | 9.05E+04         |
| 13         | 1706-1904       | 815.095           | 1        | 816.103     | 219-243       | 2.75E+05         |
| 14         | 2126-3138       | 851.056           | 1        | 852.064     | 272-419       | 3.11E+05         |
| 15         | 4933-5497       | 917.163           | 1        | 918.171     | 612-670       | 9.66E+04         |
| 16         | 4634-4669       | 935.080           | 1        | 936.088     | 583-587       | 9.60E+05         |
| 17         | 4718-5142       | 937.087           | 1        | 938.095     | 592-635       | 1.09E+05         |
| 18         | 2228-5058       | 951.074           | 1        | 952.082     | 287-626       | 3.50E+05         |
| 19         | 827-1106        | 963.133           | 1        | 964.141     | 112-144       | 2.51E+05         |
| 20         | 3820-4993       | 965.091           | 1        | 966.099     | 499-619       | 2.19E+05         |
| 21         | 4548-4972       | 987.072           | 1        | 988.080     | 573-617       | 1.15E+05         |
| 22         | 4552-4662       | 1103.086          | 1        | 1104.094    | 574-586       | 1.33E+05         |

**Table S-16: Strawberry, Screen [VIII], T-3RT**

Precursor ions present in strawberry leaves classified as ellagitannins under condition [VIII] using T-3RT.

| <b>No.</b> | <b>Scan No.</b> | <b><i>m/z</i></b> | <b>Z</b> | <b>Mass</b> | <b>RT (s)</b> | <b>Intensity</b> |
|------------|-----------------|-------------------|----------|-------------|---------------|------------------|
| 1          | 1857-2903       | 392.039           | 2        | 786.093     | 460-615       | 1.25E+05         |
| 2          | 1181-2528       | 453.039           | 2        | 908.094     | 310-570       | 5.28E+05         |
| 3          | 1987-3387       | 466.029           | 2        | 934.074     | 481-694       | 1.47E+06         |
| 4          | 2644-3064       | 467.036           | 2        | 936.089     | 583-637       | 2.87E+06         |
| 5          | 1076-2982       | 475.034           | 2        | 952.083     | 286-626       | 3.33E+05         |
| 6          | 2101-3137       | 476.041           | 2        | 954.098     | 504-649       | 1.49E+05         |
| 7          | 2948-3067       | 477.049           | 2        | 956.115     | 621-637       | 1.35E+05         |
| 8          | 1728-3073       | 482.041           | 2        | 966.099     | 436-638       | 5.55E+05         |
| 9          | 2160-2161       | 483.051           | 2        | 968.118     | 515-515       | 5.07E+04         |
| 10         | 800-1803        | 491.048           | 2        | 984.112     | 224-449       | 8.53E+04         |
| 11         | 2367-2523       | 498.055           | 2        | 998.126     | 546-570       | 1.92E+05         |
| 12         | 2294-2525       | 541.055           | 2        | 1084.126    | 534-570       | 1.54E+05         |
| 13         | 2052-2053       | 549.053           | 2        | 1100.122    | 494-494       | 6.86E+04         |
| 14         | 2964-3493       | 558.047           | 2        | 1118.110    | 623-721       | 1.91E+05         |
| 15         | 1580-2319       | 707.064           | 2        | 1416.145    | 406-539       | 9.63E+05         |
| 16         | 1843-2333       | 723.077           | 2        | 1448.171    | 457-541       | 8.20E+04         |
| 17         | 2055-2814       | 783.069           | 2        | 1568.155    | 495-605       | 6.72E+05         |
| 18         | 1937-3145       | 858.067           | 2        | 1718.150    | 473-651       | 4.46E+05         |
| 19         | 2763-3014       | 934.073           | 2        | 1870.161    | 597-630       | 3.78E+06         |
| 20         | 2730-3018       | 945.062           | 2        | 1892.140    | 593-630       | 4.81E+05         |

**Table S-17: Strawberry, Screen [IX], T-3RT**

Precursor ions present in strawberry leaves classified as ellagitannins under condition [IX] using T-3RT.

| No. | Scan No.  | <i>m/z</i> | Z | Mass     | RT (s)  | Intensity |
|-----|-----------|------------|---|----------|---------|-----------|
| 1   | 1446-2533 | 453.039    | 2 | 908.094  | 310-530 | 7.44E+05  |
| 2   | 2498-3615 | 466.029    | 2 | 934.074  | 524-690 | 2.62E+06  |
| 3   | 2904-3291 | 467.036    | 2 | 936.089  | 583-635 | 3.11E+06  |
| 4   | 1434-2460 | 475.034    | 2 | 952.084  | 308-519 | 5.84E+05  |
| 5   | 512-715   | 481.063    | 1 | 482.071  | 110-146 | 3.64E+06  |
| 6   | 2355-3297 | 482.042    | 2 | 966.099  | 499-636 | 7.58E+05  |
| 7   | 2787-2788 | 498.055    | 2 | 998.126  | 567-567 | 2.59E+05  |
| 8   | 2691-2694 | 541.055    | 2 | 1084.126 | 554-554 | 2.80E+05  |
| 9   | 3244-3780 | 558.047    | 2 | 1118.111 | 628-722 | 4.13E+05  |
| 10  | 521-522   | 566.041    | 1 | 567.049  | 111-111 | 2.84E+05  |
| 11  | 2409-2429 | 632.066    | 2 | 1266.148 | 509-513 | 4.57E+05  |
| 12  | 1468-2353 | 633.074    | 1 | 634.082  | 314-499 | 1.54E+06  |
| 13  | 525-528   | 637.067    | 1 | 638.075  | 111-111 | 5.05E+05  |
| 14  | 534-963   | 649.068    | 1 | 650.076  | 112-197 | 5.37E+05  |
| 15  | 1804-2108 | 663.084    | 1 | 664.092  | 399-457 | 2.88E+05  |
| 16  | 700-703   | 687.046    | 1 | 688.054  | 144-144 | 4.48E+05  |
| 17  | 2067-2229 | 707.064    | 2 | 1416.145 | 450-477 | 1.50E+06  |
| 18  | 1181-2121 | 783.069    | 1 | 784.077  | 245-460 | 1.16E+06  |
| 19  | 2570-2896 | 783.070    | 2 | 1568.155 | 535-582 | 1.51E+06  |
| 20  | 2127-2483 | 785.085    | 1 | 786.093  | 461-522 | 2.63E+05  |
| 21  | 1062-1133 | 815.095    | 1 | 816.103  | 221-235 | 3.34E+05  |
| 22  | 1306-1892 | 851.056    | 1 | 852.064  | 274-416 | 3.48E+05  |
| 23  | 2209-2759 | 858.067    | 2 | 1718.150 | 474-562 | 7.63E+05  |
| 24  | 2906-2933 | 935.080    | 1 | 936.088  | 583-587 | 8.38E+05  |
| 25  | 2980-2981 | 937.087    | 1 | 938.095  | 593-593 | 3.18E+05  |
| 26  | 2989-3148 | 945.062    | 2 | 1892.141 | 594-613 | 8.07E+05  |
| 27  | 1439-2492 | 951.075    | 1 | 952.083  | 309-523 | 4.86E+05  |
| 28  | 527-704   | 963.133    | 1 | 964.141  | 111-144 | 2.93E+05  |
| 29  | 2361-3189 | 965.091    | 1 | 966.099  | 500-619 | 5.18E+05  |
| 30  | 3108-3202 | 1025.084   | 2 | 2052.183 | 608-621 | 3.28E+05  |

**Table S-18: Strawberry, Screen [X], T-3RT**

Precursor ions present in strawberry leaves classified as ellagitannins under condition [X] using T-3RT.

| <b>No.</b> | <b>Scan No.</b> | <b><i>m/z</i></b> | <b>Z</b> | <b>Mass</b> | <b>RT (s)</b> | <b>Intensity</b> |
|------------|-----------------|-------------------|----------|-------------|---------------|------------------|
| 1          | 514-714         | 481.063           | 1        | 482.071     | 110-145       | 4.10E+06         |
| 2          | 1553-2271       | 633.074           | 1        | 634.082     | 348-499       | 1.68E+06         |
| 3          | 523-526         | 637.067           | 1        | 638.075     | 111-111       | 3.50E+05         |
| 4          | 533-953         | 649.069           | 1        | 650.077     | 112-195       | 5.98E+05         |
| 5          | 1768-2049       | 663.084           | 1        | 664.092     | 400-457       | 2.85E+05         |
| 6          | 700-702         | 687.046           | 1        | 688.054     | 143-143       | 4.15E+05         |
| 7          | 1160-2066       | 783.069           | 1        | 784.077     | 244-461       | 1.16E+06         |
| 8          | 2386-2387       | 785.085           | 1        | 786.093     | 522-522       | 2.86E+05         |
| 9          | 1044-1110       | 815.095           | 1        | 816.103     | 220-234       | 3.41E+05         |
| 10         | 1287-1847       | 851.056           | 1        | 852.064     | 273-416       | 3.97E+05         |
| 11         | 2748-2767       | 935.080           | 1        | 936.088     | 583-587       | 9.22E+05         |
| 12         | 2802-2803       | 937.087           | 1        | 938.095     | 593-593       | 2.76E+05         |
| 13         | 1417-2392       | 951.075           | 1        | 952.083     | 309-522       | 4.59E+05         |
| 14         | 529-530         | 963.133           | 1        | 964.141     | 111-111       | 2.81E+05         |
| 15         | 2279-2983       | 965.091           | 1        | 966.099     | 500-619       | 4.52E+05         |

**Table S-19: Strawberry, Screen [XI], T-3RT**

Precursor ions present in strawberry leaves classified as ellagitannins under condition [XI] using T-3RT.

| <b>No.</b> | <b>Scan No.</b> | <b><i>m/z</i></b> | <b>Z</b> | <b>Mass</b> | <b>RT (s)</b> | <b>Intensity</b> |
|------------|-----------------|-------------------|----------|-------------|---------------|------------------|
| 1          | 1057-1880       | 453.039           | 2        | 908.094     | 310-529       | 7.41E+05         |
| 2          | 1853-2613       | 466.029           | 2        | 934.074     | 523-692       | 2.49E+06         |
| 3          | 2134-2388       | 467.036           | 2        | 936.088     | 583-634       | 3.13E+06         |
| 4          | 1048-1852       | 475.034           | 2        | 952.084     | 307-523       | 6.82E+05         |
| 5          | 1754-2392       | 482.041           | 2        | 966.099     | 498-635       | 7.87E+05         |
| 6          | 2048-2049       | 498.055           | 2        | 998.126     | 567-567       | 2.78E+05         |
| 7          | 1983-1984       | 541.055           | 2        | 1084.126    | 553-554       | 2.73E+05         |
| 8          | 2357-2713       | 558.047           | 2        | 1118.111    | 627-721       | 3.92E+05         |
| 9          | 1565-1673       | 707.065           | 2        | 1416.145    | 450-477       | 1.86E+06         |
| 10         | 1903-2112       | 783.069           | 2        | 1568.155    | 534-578       | 1.67E+06         |
| 11         | 1659-2026       | 858.067           | 2        | 1718.150    | 474-562       | 8.28E+05         |
| 12         | 2193-2290       | 945.062           | 2        | 1892.140    | 594-612       | 8.35E+05         |

**Table S-20: Strawberry, Screen [I], T-2RT**

Precursor ions present in strawberry leaves classified as ellagitannins under condition [I] using T-2RT.

| No. | Scan No.  | <i>m/z</i> | Z | Mass     | RT (s)  | Intensity |
|-----|-----------|------------|---|----------|---------|-----------|
| 1   | 5109-5181 | 316.033    | 2 | 634.082  | 481-487 | 2.19E+06  |
| 2   | 2581-4420 | 391.031    | 2 | 784.077  | 249-419 | 6.71E+05  |
| 3   | 2317-2347 | 407.043    | 2 | 816.103  | 225-227 | 1.70E+05  |
| 4   | 3263-5648 | 453.039    | 2 | 908.093  | 312-531 | 4.88E+05  |
| 5   | 4743-4744 | 464.030    | 2 | 930.075  | 449-449 | 2.12E+05  |
| 6   | 5421-7381 | 466.029    | 2 | 934.073  | 510-693 | 1.98E+06  |
| 7   | 6079-6081 | 466.529    | 2 | 935.075  | 572-572 | 9.26E+05  |
| 8   | 6210-6813 | 467.036    | 2 | 936.088  | 584-638 | 3.09E+06  |
| 9   | 4674-4685 | 469.052    | 2 | 940.119  | 443-444 | 1.43E+05  |
| 10  | 3098-5544 | 475.034    | 2 | 952.083  | 296-521 | 4.08E+05  |
| 11  | 5414-5415 | 476.041    | 2 | 954.098  | 509-509 | 1.40E+05  |
| 12  | 6120-6503 | 477.019    | 2 | 956.054  | 576-610 | 1.09E+06  |
| 13  | 6859-7489 | 477.104    | 1 | 478.112  | 642-704 | 5.83E+05  |
| 14  | 6227-6275 | 478.027    | 2 | 958.070  | 586-590 | 9.19E+05  |
| 15  | 6022-7288 | 479.250    | 1 | 480.258  | 567-684 | 1.92E+06  |
| 16  | 1117-1538 | 481.063    | 1 | 482.071  | 110-150 | 4.31E+06  |
| 17  | 5317-6629 | 482.041    | 2 | 966.099  | 500-621 | 8.34E+05  |
| 18  | 3248-4724 | 486.024    | 2 | 974.065  | 310-447 | 2.54E+05  |
| 19  | 2638-4380 | 491.028    | 2 | 984.072  | 254-416 | 1.70E+05  |
| 20  | 6202-6216 | 529.044    | 2 | 1060.105 | 583-585 | 4.81E+05  |
| 21  | 7129-7802 | 542.034    | 2 | 1086.085 | 668-734 | 7.60E+05  |
| 22  | 1460-1461 | 549.050    | 1 | 550.058  | 143-143 | 5.19E+05  |
| 23  | 6193-6799 | 551.040    | 2 | 1104.095 | 583-637 | 1.35E+06  |
| 24  | 7086-8066 | 551.214    | 1 | 552.222  | 664-760 | 9.79E+05  |
| 25  | 7309-7330 | 553.025    | 2 | 1108.066 | 687-688 | 4.51E+05  |
| 26  | 6714-7692 | 558.047    | 2 | 1118.110 | 629-723 | 3.00E+05  |
| 27  | 6206-6218 | 562.030    | 2 | 1126.076 | 584-585 | 3.89E+05  |
| 28  | 5508-5547 | 598.078    | 2 | 1198.173 | 518-522 | 6.31E+05  |
| 29  | 6268-6334 | 617.032    | 2 | 1236.081 | 589-595 | 4.20E+06  |
| 30  | 6280-6300 | 628.022    | 2 | 1258.060 | 590-592 | 1.53E+06  |
| 31  | 4369-4734 | 631.058    | 2 | 1264.131 | 415-448 | 2.83E+05  |
| 32  | 4136-5727 | 631.058    | 1 | 632.066  | 394-539 | 1.75E+06  |
| 33  | 5435-5467 | 632.066    | 2 | 1266.147 | 511-514 | 5.64E+05  |
| 34  | 1780-5313 | 633.074    | 1 | 634.082  | 174-499 | 1.28E+06  |
| 35  | 1136-1137 | 637.067    | 1 | 638.075  | 112-112 | 5.22E+05  |
| 36  | 1616-2040 | 649.068    | 1 | 650.076  | 158-199 | 3.94E+05  |



|    |           |          |   |          |         |          |
|----|-----------|----------|---|----------|---------|----------|
| 37 | 4268-5162 | 655.055  | 1 | 656.063  | 406-486 | 5.29E+05 |
| 38 | 4223-4865 | 663.084  | 1 | 664.092  | 402-460 | 3.13E+05 |
| 39 | 7247-7298 | 692.030  | 2 | 1386.075 | 680-685 | 3.64E+05 |
| 40 | 4848-5092 | 707.064  | 2 | 1416.145 | 459-479 | 1.79E+06 |
| 41 | 4943-5045 | 718.054  | 2 | 1438.124 | 467-475 | 5.70E+05 |
| 42 | 4839-4858 | 723.077  | 2 | 1448.169 | 458-460 | 1.74E+05 |
| 43 | 5020-5029 | 729.045  | 2 | 1460.106 | 473-474 | 2.78E+05 |
| 44 | 2311-4881 | 783.069  | 1 | 784.077  | 224-462 | 7.81E+05 |
| 45 | 5986-6182 | 783.069  | 2 | 1568.154 | 564-582 | 1.86E+06 |
| 46 | 4888-4890 | 785.084  | 1 | 786.092  | 462-462 | 2.32E+05 |
| 47 | 3542-3640 | 789.050  | 2 | 1580.116 | 338-347 | 2.20E+05 |
| 48 | 3517-3846 | 798.055  | 2 | 1598.127 | 336-367 | 2.54E+05 |
| 49 | 2579-2624 | 805.050  | 1 | 806.058  | 249-253 | 1.48E+05 |
| 50 | 2274-2445 | 815.095  | 1 | 816.103  | 221-236 | 3.40E+05 |
| 51 | 2852-4378 | 851.056  | 1 | 852.064  | 274-416 | 2.64E+05 |
| 52 | 5050-5931 | 858.067  | 2 | 1718.150 | 476-559 | 8.67E+05 |
| 53 | 5973-6023 | 867.072  | 2 | 1736.160 | 563-567 | 1.31E+06 |
| 54 | 5775-5776 | 869.057  | 2 | 1740.130 | 544-544 | 3.97E+05 |
| 55 | 2889-2924 | 873.038  | 1 | 874.046  | 277-280 | 1.06E+05 |
| 56 | 6131-6154 | 874.079  | 2 | 1750.175 | 577-579 | 8.52E+05 |
| 57 | 6006-6017 | 878.062  | 2 | 1758.141 | 565-566 | 2.48E+05 |
| 58 | 5796-7356 | 933.064  | 1 | 934.072  | 546-691 | 1.24E+06 |
| 59 | 6506-6755 | 934.073  | 2 | 1870.162 | 610-632 | 4.40E+06 |
| 60 | 6223-6273 | 935.079  | 1 | 936.087  | 585-589 | 1.20E+06 |
| 61 | 6518-6561 | 945.061  | 2 | 1892.139 | 611-615 | 1.09E+06 |
| 62 | 7698-7741 | 949.059  | 1 | 950.067  | 724-728 | 3.20E+05 |
| 63 | 4967-5011 | 949.059  | 2 | 1900.135 | 469-472 | 2.72E+05 |
| 64 | 3028-5564 | 951.074  | 1 | 952.082  | 289-523 | 3.33E+05 |
| 65 | 5327-6631 | 965.090  | 1 | 966.098  | 500-621 | 6.01E+05 |
| 66 | 6644-7117 | 1009.069 | 2 | 2020.155 | 623-667 | 8.23E+05 |
| 67 | 6627-6638 | 1025.083 | 2 | 2052.181 | 621-622 | 2.32E+05 |

**Table S-21: Strawberry, Screen [II], T-2RT**

Precursor ions present in strawberry leaves classified as ellagitannins under condition [II] using T-2RT.

| <b>No.</b> | <b>Scan No.</b> | <b><i>m/z</i></b> | <b>Z</b> | <b>Mass</b> | <b>RT (s)</b> | <b>Intensity</b> |
|------------|-----------------|-------------------|----------|-------------|---------------|------------------|
| 1          | 6773-7403       | 477.104           | 1        | 478.112     | 642-704       | 6.54E+05         |
| 2          | 1124-1539       | 481.063           | 1        | 482.071     | 110-150       | 4.39E+06         |
| 3          | 1459-1462       | 549.050           | 1        | 550.058     | 142-143       | 1.76E+05         |
| 4          | 6990-7976       | 551.214           | 1        | 552.222     | 663-760       | 8.63E+05         |
| 5          | 6008-6038       | 611.256           | 1        | 612.264     | 571-574       | 1.43E+06         |
| 6          | 4118-5667       | 631.058           | 1        | 632.066     | 395-539       | 1.37E+06         |
| 7          | 1780-5267       | 633.074           | 1        | 634.082     | 173-500       | 1.01E+06         |
| 8          | 1143-1152       | 637.067           | 1        | 638.075     | 112-113       | 4.85E+05         |
| 9          | 1622-2056       | 649.068           | 1        | 650.076     | 158-199       | 3.81E+05         |
| 10         | 4248-5114       | 655.055           | 1        | 656.063     | 406-486       | 4.76E+05         |
| 11         | 4194-4836       | 663.084           | 1        | 664.092     | 402-461       | 2.92E+05         |
| 12         | 2027-2043       | 671.050           | 1        | 672.058     | 197-198       | 9.31E+04         |
| 13         | 2313-4843       | 783.069           | 1        | 784.077     | 225-462       | 7.41E+05         |
| 14         | 4848-5500       | 785.084           | 1        | 786.092     | 462-522       | 2.45E+05         |
| 15         | 2584-2953       | 805.050           | 1        | 806.058     | 249-283       | 1.31E+05         |
| 16         | 2270-2456       | 815.095           | 1        | 816.103     | 221-237       | 3.18E+05         |
| 17         | 2327-2339       | 831.090           | 1        | 832.098     | 226-227       | 1.12E+05         |
| 18         | 2852-4371       | 851.056           | 1        | 852.064     | 274-417       | 2.72E+05         |
| 19         | 2876-2936       | 873.038           | 1        | 874.046     | 276-281       | 9.70E+04         |
| 20         | 5729-7296       | 933.064           | 1        | 934.072     | 545-693       | 9.20E+05         |
| 21         | 6149-6217       | 935.079           | 1        | 936.087     | 584-589       | 1.02E+06         |
| 22         | 7602-7651       | 949.059           | 1        | 950.067     | 724-728       | 2.64E+05         |
| 23         | 3015-6190       | 951.074           | 1        | 952.082     | 289-587       | 3.40E+05         |
| 24         | 5266-6559       | 965.090           | 1        | 966.098     | 500-621       | 5.33E+05         |
| 25         | 7059-7060       | 1085.075          | 1        | 1086.083    | 669-669       | 2.59E+05         |
| 26         | 6150-6161       | 1103.086          | 1        | 1104.094    | 584-585       | 1.19E+05         |

**Table S-22: Strawberry, Screen [III], T-2RT**

Precursor ions present in strawberry leaves classified as ellagitannins under condition [III] using T-2RT.

| No. | Scan No.  | <i>m/z</i> | Z | Mass     | RT (s)  | Intensity |
|-----|-----------|------------|---|----------|---------|-----------|
| 1   | 2721-3684 | 316.033    | 2 | 634.082  | 402-487 | 1.57E+06  |
| 2   | 588-5879  | 391.031    | 2 | 784.077  | 165-682 | 3.14E+05  |
| 3   | 3361-4087 | 392.038    | 2 | 786.093  | 460-524 | 1.51E+05  |
| 4   | 980-1212  | 407.044    | 2 | 816.103  | 221-243 | 1.25E+05  |
| 5   | 2861-2901 | 425.024    | 2 | 852.065  | 414-417 | 8.63E+04  |
| 6   | 1527-2893 | 436.015    | 2 | 874.046  | 275-417 | 6.36E+04  |
| 7   | 2907-2944 | 437.026    | 2 | 876.067  | 418-421 | 6.93E+04  |
| 8   | 6396-6414 | 452.049    | 2 | 906.115  | 744-746 | 2.66E+05  |
| 9   | 1857-4658 | 453.039    | 2 | 908.093  | 309-572 | 3.50E+05  |
| 10  | 3415-3427 | 462.044    | 2 | 926.105  | 464-466 | 6.94E+04  |
| 11  | 3185-4066 | 464.030    | 2 | 930.075  | 445-522 | 1.95E+05  |
| 12  | 5636-6306 | 465.020    | 2 | 932.057  | 660-729 | 3.06E+05  |
| 13  | 3614-6025 | 466.029    | 2 | 934.073  | 482-694 | 9.71E+05  |
| 14  | 4786-5389 | 467.036    | 2 | 936.088  | 585-637 | 3.17E+06  |
| 15  | 6417-6421 | 467.054    | 2 | 936.125  | 747-748 | 7.49E+04  |
| 16  | 5407-5487 | 468.044    | 2 | 938.104  | 639-646 | 1.46E+05  |
| 17  | 3146-5858 | 469.052    | 2 | 940.120  | 441-680 | 2.71E+05  |
| 18  | 3830-6299 | 474.026    | 2 | 950.068  | 501-729 | 2.97E+05  |
| 19  | 1617-5278 | 475.034    | 2 | 952.083  | 285-627 | 1.96E+05  |
| 20  | 6102-6104 | 475.052    | 2 | 952.119  | 706-707 | 6.62E+04  |
| 21  | 3845-5530 | 476.041    | 2 | 954.098  | 503-650 | 1.08E+05  |
| 22  | 4206-5999 | 477.019    | 2 | 956.054  | 534-692 | 3.99E+05  |
| 23  | 5402-5420 | 477.049    | 2 | 956.115  | 638-640 | 1.32E+05  |
| 24  | 4788-5392 | 478.027    | 2 | 958.070  | 585-637 | 5.83E+05  |
| 25  | 4961-5622 | 481.034    | 2 | 964.083  | 600-658 | 1.88E+05  |
| 26  | 3790-5408 | 482.041    | 2 | 966.099  | 498-639 | 4.35E+05  |
| 27  | 1698-4078 | 486.024    | 2 | 974.065  | 292-523 | 1.57E+05  |
| 28  | 1279-2918 | 491.028    | 2 | 984.072  | 250-419 | 1.30E+05  |
| 29  | 1001-3265 | 491.048    | 2 | 984.111  | 223-451 | 7.21E+04  |
| 30  | 5152-5204 | 493.033    | 2 | 988.081  | 617-621 | 1.86E+05  |
| 31  | 1850-3106 | 497.015    | 2 | 996.047  | 309-438 | 8.67E+04  |
| 32  | 4602-4645 | 498.055    | 2 | 998.126  | 568-571 | 2.90E+05  |
| 33  | 5020-5969 | 511.013    | 2 | 1024.042 | 605-689 | 1.10E+05  |
| 34  | 4805-5359 | 512.021    | 2 | 1026.057 | 587-635 | 2.59E+05  |
| 35  | 5572-5588 | 522.004    | 2 | 1046.025 | 654-655 | 1.17E+05  |
| 36  | 4766-5714 | 529.044    | 2 | 1060.105 | 583-667 | 2.27E+05  |

|    |           |         |   |          |         |          |
|----|-----------|---------|---|----------|---------|----------|
| 37 | 1883-3124 | 531.009 | 2 | 1064.034 | 312-439 | 1.03E+05 |
| 38 | 4237-4628 | 541.055 | 2 | 1084.126 | 536-570 | 1.89E+05 |
| 39 | 3666-6467 | 542.034 | 2 | 1086.084 | 486-755 | 4.30E+05 |
| 40 | 3751-3781 | 549.052 | 2 | 1100.121 | 494-497 | 7.37E+04 |
| 41 | 4678-5421 | 551.040 | 2 | 1104.095 | 574-640 | 6.66E+05 |
| 42 | 5914-6169 | 553.025 | 2 | 1108.066 | 685-714 | 2.31E+05 |
| 43 | 1191-1827 | 556.060 | 2 | 1114.136 | 241-307 | 6.91E+04 |
| 44 | 5279-6245 | 558.047 | 2 | 1118.110 | 627-724 | 2.09E+05 |
| 45 | 4767-4782 | 562.030 | 2 | 1126.077 | 583-585 | 2.88E+05 |
| 46 | 3733-3780 | 563.050 | 2 | 1128.116 | 493-497 | 7.08E+04 |
| 47 | 5737-6170 | 564.016 | 2 | 1130.048 | 669-714 | 1.17E+05 |
| 48 | 6222-6234 | 569.038 | 2 | 1140.092 | 722-723 | 7.50E+04 |
| 49 | 5522-6187 | 594.076 | 2 | 1190.168 | 649-716 | 5.45E+04 |
| 50 | 6158-6166 | 598.010 | 2 | 1198.035 | 713-714 | 7.47E+04 |
| 51 | 4004-4068 | 598.078 | 2 | 1198.173 | 517-522 | 5.59E+05 |
| 52 | 3980-4232 | 616.089 | 2 | 1234.195 | 515-536 | 1.09E+05 |
| 53 | 4827-4976 | 617.032 | 2 | 1236.081 | 588-601 | 2.10E+06 |
| 54 | 4838-4893 | 628.022 | 2 | 1258.060 | 589-594 | 1.10E+06 |
| 55 | 640-1873  | 629.042 | 2 | 1260.100 | 178-311 | 6.77E+05 |
| 56 | 2855-4151 | 631.058 | 2 | 1264.131 | 413-529 | 2.18E+05 |
| 57 | 3926-3993 | 632.066 | 2 | 1266.147 | 510-516 | 4.25E+05 |
| 58 | 3939-3975 | 643.056 | 2 | 1288.129 | 511-514 | 1.32E+05 |
| 59 | 5814-6331 | 692.029 | 2 | 1386.075 | 676-732 | 2.12E+05 |
| 60 | 4989-5011 | 701.035 | 2 | 1404.086 | 603-605 | 2.21E+05 |
| 61 | 2773-4285 | 707.064 | 2 | 1416.144 | 406-540 | 7.04E+05 |
| 62 | 4195-4199 | 716.069 | 2 | 1434.154 | 533-533 | 1.18E+05 |
| 63 | 3339-3578 | 718.054 | 2 | 1438.124 | 458-478 | 3.62E+05 |
| 64 | 3318-4330 | 723.077 | 2 | 1448.169 | 456-544 | 1.10E+05 |
| 65 | 3422-3546 | 729.044 | 2 | 1460.105 | 465-476 | 1.70E+05 |
| 66 | 3448-3525 | 740.036 | 2 | 1482.089 | 467-474 | 1.17E+05 |
| 67 | 3654-3698 | 782.061 | 2 | 1566.138 | 485-489 | 1.09E+05 |
| 68 | 3764-5030 | 783.069 | 2 | 1568.155 | 495-606 | 6.11E+05 |
| 69 | 877-2262  | 789.050 | 2 | 1580.116 | 210-352 | 1.65E+05 |
| 70 | 3796-3906 | 791.066 | 2 | 1584.148 | 498-508 | 7.12E+04 |
| 71 | 1533-4690 | 794.059 | 2 | 1590.135 | 276-575 | 3.18E+05 |
| 72 | 2086-2563 | 798.055 | 2 | 1598.127 | 333-387 | 1.80E+05 |
| 73 | 3530-5552 | 858.067 | 2 | 1718.150 | 474-652 | 3.60E+05 |
| 74 | 4751-4762 | 859.075 | 2 | 1720.165 | 581-583 | 1.84E+05 |
| 75 | 4546-4604 | 867.072 | 2 | 1736.160 | 563-568 | 9.60E+05 |
| 76 | 3678-4518 | 869.057 | 2 | 1740.130 | 487-560 | 1.76E+05 |
| 77 | 4158-4742 | 874.080 | 2 | 1750.176 | 530-580 | 5.54E+05 |
| 78 | 4562-4595 | 878.062 | 2 | 1758.141 | 564-567 | 3.06E+05 |
| 79 | 4324-4328 | 880.048 | 2 | 1762.112 | 544-544 | 1.15E+05 |

|    |           |          |   |          |         |          |
|----|-----------|----------|---|----------|---------|----------|
| 80 | 5025-5900 | 933.064  | 2 | 1868.144 | 606-683 | 6.42E+05 |
| 81 | 4934-5340 | 934.073  | 2 | 1870.162 | 598-633 | 2.74E+06 |
| 82 | 3740-3817 | 941.061  | 2 | 1884.139 | 493-500 | 8.54E+04 |
| 83 | 4898-5344 | 945.062  | 2 | 1892.140 | 595-633 | 5.56E+05 |
| 84 | 2479-3593 | 949.059  | 2 | 1900.133 | 380-480 | 1.52E+05 |
| 85 | 1041-5135 | 956.051  | 2 | 1914.117 | 226-615 | 2.06E+05 |
| 86 | 2828-2860 | 957.055  | 2 | 1916.126 | 411-414 | 8.55E+04 |
| 87 | 2491-2558 | 958.063  | 2 | 1918.143 | 381-387 | 7.11E+04 |
| 88 | 2954-3191 | 963.056  | 2 | 1928.129 | 422-445 | 1.46E+05 |
| 89 | 2952-3178 | 972.061  | 2 | 1946.138 | 422-444 | 1.55E+05 |
| 90 | 3432-3436 | 996.135  | 2 | 1994.286 | 466-466 | 6.70E+04 |
| 91 | 3437-3438 | 1007.125 | 2 | 2016.266 | 466-466 | 6.05E+04 |
| 92 | 5217-6251 | 1009.069 | 2 | 2020.155 | 622-724 | 4.03E+05 |
| 93 | 4700-4784 | 1018.075 | 2 | 2038.166 | 576-585 | 5.26E+05 |
| 94 | 5232-5698 | 1020.060 | 2 | 2042.137 | 623-665 | 1.71E+05 |
| 95 | 5062-5243 | 1025.083 | 2 | 2052.181 | 609-624 | 2.23E+05 |
| 96 | 5677-5680 | 1031.051 | 2 | 2064.117 | 664-664 | 7.04E+04 |
| 97 | 5103-5115 | 1138.172 | 2 | 2278.360 | 612-613 | 2.26E+05 |

**Table S-23: Strawberry, Screen [IV], T-2RT**

Precursor ions present in strawberry leaves classified as ellagitannins under condition [IV] using T-2RT.

| No. | Scan No.  | <i>m/z</i> | Z | Mass    | RT (s)  | Intensity |
|-----|-----------|------------|---|---------|---------|-----------|
| 1   | 4072-4250 | 303.015    | 1 | 304.023 | 600-618 | 1.21E+05  |
| 2   | 1017-4860 | 391.031    | 2 | 784.077 | 164-681 | 2.74E+05  |
| 3   | 3133-3957 | 392.038    | 2 | 786.093 | 508-590 | 1.39E+05  |
| 4   | 1339-1415 | 407.043    | 2 | 816.103 | 221-233 | 5.42E+04  |
| 5   | 2380-2382 | 425.024    | 2 | 852.064 | 413-413 | 7.81E+04  |
| 6   | 1655-2385 | 436.015    | 2 | 874.046 | 276-414 | 5.05E+04  |
| 7   | 2414-2415 | 437.025    | 2 | 876.067 | 417-417 | 5.06E+04  |
| 8   | 5418-5420 | 452.049    | 2 | 906.115 | 745-745 | 3.39E+05  |
| 9   | 1823-3734 | 453.039    | 2 | 908.093 | 309-569 | 2.56E+05  |
| 10  | 3404-4367 | 453.104    | 1 | 454.112 | 536-629 | 1.45E+06  |
| 11  | 3140-3143 | 460.028    | 2 | 922.073 | 509-510 | 5.39E+04  |
| 12  | 2763-2764 | 462.044    | 2 | 926.105 | 463-464 | 5.82E+04  |
| 13  | 2602-3228 | 464.029    | 2 | 930.075 | 444-519 | 6.86E+04  |
| 14  | 2907-4890 | 466.029    | 2 | 934.073 | 481-685 | 7.28E+05  |
| 15  | 3769-3773 | 466.529    | 2 | 935.075 | 572-572 | 9.76E+05  |
| 16  | 3982-4401 | 467.035    | 2 | 936.087 | 592-633 | 9.59E+05  |
| 17  | 5436-5438 | 467.054    | 2 | 936.125 | 747-747 | 6.15E+04  |
| 18  | 4465-4469 | 468.044    | 2 | 938.103 | 638-639 | 1.46E+05  |
| 19  | 2580-4911 | 469.052    | 2 | 940.120 | 440-687 | 1.20E+05  |
| 20  | 2392-2393 | 470.009    | 2 | 942.034 | 414-415 | 5.82E+04  |
| 21  | 3109-5205 | 474.026    | 2 | 950.068 | 505-720 | 1.34E+05  |
| 22  | 1712-4335 | 475.033    | 2 | 952.083 | 286-626 | 1.47E+05  |
| 23  | 3098-4561 | 476.041    | 2 | 954.098 | 504-649 | 9.83E+04  |
| 24  | 3289-4912 | 477.019    | 2 | 956.055 | 524-687 | 1.43E+05  |
| 25  | 4904-4907 | 477.020    | 1 | 478.028 | 686-686 | 5.58E+04  |
| 26  | 4283-4455 | 477.050    | 2 | 956.115 | 621-638 | 1.10E+05  |
| 27  | 4492-5333 | 477.104    | 1 | 478.112 | 641-735 | 2.91E+05  |
| 28  | 4099-4102 | 477.521    | 1 | 478.529 | 603-603 | 1.01E+05  |
| 29  | 3916-4409 | 478.027    | 2 | 958.070 | 586-633 | 7.40E+05  |
| 30  | 3689-5036 | 479.250    | 1 | 480.258 | 565-701 | 2.55E+05  |
| 31  | 3681-4648 | 481.034    | 2 | 964.083 | 564-658 | 1.82E+05  |
| 32  | 628-929   | 481.064    | 1 | 482.072 | 110-153 | 6.53E+06  |
| 33  | 2541-4393 | 482.041    | 2 | 966.099 | 436-632 | 3.52E+05  |
| 34  | 3191-3192 | 483.051    | 2 | 968.118 | 514-515 | 5.41E+04  |
| 35  | 1734-3238 | 486.024    | 2 | 974.065 | 290-520 | 8.74E+04  |
| 36  | 4117-4120 | 490.039    | 1 | 491.047 | 604-605 | 1.32E+05  |

|    |           |         |   |          |         |          |
|----|-----------|---------|---|----------|---------|----------|
| 37 | 3654-4471 | 490.040 | 2 | 982.095  | 561-639 | 1.47E+05 |
| 38 | 1517-2428 | 491.028 | 2 | 984.071  | 251-419 | 5.88E+04 |
| 39 | 1350-2582 | 491.048 | 2 | 984.111  | 223-441 | 5.67E+04 |
| 40 | 2685-3371 | 491.177 | 1 | 492.185  | 453-532 | 1.64E+05 |
| 41 | 4125-4128 | 493.032 | 1 | 494.040  | 605-605 | 1.05E+05 |
| 42 | 3253-4267 | 493.033 | 2 | 988.081  | 521-619 | 1.27E+05 |
| 43 | 1820-3239 | 497.016 | 2 | 996.047  | 309-520 | 8.26E+04 |
| 44 | 3514-3714 | 498.055 | 2 | 998.126  | 547-567 | 8.13E+04 |
| 45 | 3281-3282 | 509.058 | 1 | 510.066  | 524-524 | 5.07E+04 |
| 46 | 3493-4925 | 511.013 | 2 | 1024.042 | 545-688 | 8.95E+04 |
| 47 | 3892-4421 | 512.021 | 2 | 1026.057 | 584-634 | 8.32E+04 |
| 48 | 3500-3819 | 522.004 | 2 | 1046.025 | 545-576 | 8.23E+04 |
| 49 | 4372-5460 | 523.203 | 1 | 524.211  | 630-750 | 1.31E+05 |
| 50 | 4253-4257 | 527.027 | 2 | 1056.070 | 618-618 | 8.63E+04 |
| 51 | 3812-4712 | 529.044 | 2 | 1060.105 | 576-664 | 1.17E+05 |
| 52 | 1832-3242 | 531.009 | 2 | 1064.034 | 310-520 | 7.33E+04 |
| 53 | 3888-3889 | 540.035 | 2 | 1082.086 | 583-584 | 6.80E+04 |
| 54 | 3392-3727 | 541.055 | 2 | 1084.126 | 535-568 | 8.33E+04 |
| 55 | 5531-5532 | 541.287 | 1 | 542.295  | 758-758 | 6.15E+04 |
| 56 | 2612-3247 | 542.001 | 2 | 1086.017 | 445-520 | 7.76E+04 |
| 57 | 2932-5485 | 542.034 | 2 | 1086.084 | 485-752 | 1.34E+05 |
| 58 | 3169-3172 | 548.063 | 2 | 1098.142 | 512-512 | 5.54E+04 |
| 59 | 645-827   | 549.050 | 1 | 550.058  | 112-141 | 1.17E+05 |
| 60 | 3021-3024 | 549.053 | 2 | 1100.122 | 494-494 | 8.25E+04 |
| 61 | 3778-4430 | 551.040 | 2 | 1104.095 | 573-635 | 4.24E+05 |
| 62 | 4893-5267 | 553.025 | 2 | 1108.066 | 685-727 | 1.45E+05 |
| 63 | 4200-4201 | 554.044 | 2 | 1110.104 | 613-613 | 1.14E+05 |
| 64 | 3504-4936 | 555.998 | 2 | 1114.012 | 546-689 | 7.07E+04 |
| 65 | 1469-1708 | 556.060 | 2 | 1114.136 | 242-286 | 6.33E+04 |
| 66 | 4298-5210 | 558.047 | 2 | 1118.110 | 623-721 | 9.48E+04 |
| 67 | 3799-4443 | 562.030 | 2 | 1126.077 | 575-636 | 1.15E+05 |
| 68 | 3006-3007 | 563.050 | 2 | 1128.117 | 493-493 | 5.55E+04 |
| 69 | 4741-5146 | 564.016 | 2 | 1130.047 | 667-714 | 8.10E+04 |
| 70 | 4354-5219 | 569.038 | 2 | 1140.092 | 628-722 | 9.03E+04 |
| 71 | 3878-3879 | 573.022 | 2 | 1148.059 | 582-582 | 5.71E+04 |
| 72 | 649-650   | 579.031 | 1 | 580.039  | 112-112 | 1.58E+05 |
| 73 | 4211-5167 | 594.076 | 2 | 1190.168 | 614-716 | 6.71E+04 |
| 74 | 3201-3204 | 598.079 | 2 | 1198.173 | 516-516 | 1.14E+05 |
| 75 | 1019-1188 | 605.078 | 1 | 606.086  | 164-193 | 5.56E+04 |
| 76 | 3894-3897 | 607.016 | 2 | 1216.047 | 584-584 | 5.13E+04 |
| 77 | 3181-3352 | 616.090 | 2 | 1234.196 | 513-531 | 5.40E+04 |
| 78 | 3867-4377 | 617.032 | 2 | 1236.080 | 581-630 | 6.76E+05 |
| 79 | 4340-4342 | 625.029 | 2 | 1252.073 | 627-627 | 5.88E+04 |

|     |           |         |   |          |         |          |
|-----|-----------|---------|---|----------|---------|----------|
| 80  | 3940-3943 | 628.022 | 2 | 1258.060 | 588-588 | 9.23E+04 |
| 81  | 2379-3839 | 631.058 | 2 | 1264.131 | 413-578 | 2.11E+05 |
| 82  | 2246-3729 | 631.058 | 1 | 632.066  | 392-568 | 1.01E+06 |
| 83  | 3137-3341 | 632.065 | 2 | 1266.145 | 509-530 | 6.28E+04 |
| 84  | 1048-3040 | 633.073 | 1 | 634.081  | 169-497 | 1.29E+05 |
| 85  | 636-638   | 637.067 | 1 | 638.075  | 111-111 | 4.82E+05 |
| 86  | 3148-3151 | 643.057 | 2 | 1288.129 | 510-510 | 9.35E+04 |
| 87  | 2537-2539 | 647.056 | 2 | 1296.128 | 435-435 | 5.47E+04 |
| 88  | 644-1166  | 649.068 | 1 | 650.076  | 112-189 | 2.96E+05 |
| 89  | 2312-3994 | 655.055 | 1 | 656.063  | 403-593 | 9.59E+04 |
| 90  | 2285-2696 | 663.083 | 1 | 664.091  | 398-455 | 7.38E+04 |
| 91  | 851-855   | 665.064 | 1 | 666.072  | 144-144 | 3.31E+05 |
| 92  | 4425-4429 | 666.068 | 2 | 1334.152 | 635-635 | 7.77E+04 |
| 93  | 1018-1181 | 671.050 | 1 | 672.058  | 164-192 | 7.70E+04 |
| 94  | 4026-4028 | 673.123 | 2 | 1348.263 | 596-596 | 9.62E+04 |
| 95  | 3991-3995 | 675.121 | 2 | 1352.257 | 593-593 | 8.93E+04 |
| 96  | 832-834   | 681.058 | 1 | 682.066  | 142-142 | 1.02E+05 |
| 97  | 3993-3996 | 686.112 | 2 | 1374.240 | 593-593 | 7.83E+04 |
| 98  | 848-849   | 687.046 | 1 | 688.054  | 143-143 | 4.33E+05 |
| 99  | 4827-5248 | 692.030 | 2 | 1386.075 | 676-725 | 1.18E+05 |
| 100 | 4032-4318 | 701.035 | 2 | 1404.086 | 596-625 | 9.05E+04 |
| 101 | 2325-3359 | 707.064 | 2 | 1416.145 | 405-531 | 5.47E+05 |
| 102 | 4894-4896 | 708.043 | 2 | 1418.102 | 685-685 | 7.20E+04 |
| 103 | 3358-3360 | 716.068 | 2 | 1434.153 | 531-531 | 5.82E+04 |
| 104 | 2708-2811 | 718.054 | 2 | 1438.124 | 457-470 | 1.71E+05 |
| 105 | 2330-2908 | 723.043 | 1 | 724.051  | 405-481 | 1.34E+05 |
| 106 | 2702-3461 | 723.077 | 2 | 1448.170 | 456-542 | 6.72E+04 |
| 107 | 2770-2793 | 729.043 | 2 | 1460.102 | 464-467 | 1.26E+05 |
| 108 | 2783-2784 | 740.037 | 2 | 1482.090 | 466-466 | 6.44E+04 |
| 109 | 3921-3922 | 756.109 | 2 | 1514.233 | 586-587 | 5.81E+04 |
| 110 | 2925-4359 | 782.062 | 2 | 1566.139 | 484-629 | 1.02E+05 |
| 111 | 1006-4170 | 783.069 | 1 | 784.077  | 163-610 | 4.46E+05 |
| 112 | 3029-4090 | 783.069 | 2 | 1568.155 | 495-602 | 8.54E+05 |
| 113 | 2739-3254 | 785.084 | 1 | 786.092  | 461-521 | 1.89E+05 |
| 114 | 2804-3051 | 791.067 | 2 | 1584.149 | 469-498 | 6.04E+04 |
| 115 | 2387-3809 | 794.060 | 2 | 1590.135 | 414-576 | 3.44E+05 |
| 116 | 1942-2188 | 798.055 | 2 | 1598.126 | 333-382 | 1.59E+05 |
| 117 | 2775-3824 | 799.064 | 1 | 800.072  | 465-577 | 5.97E+04 |
| 118 | 882-3301  | 801.079 | 1 | 802.087  | 147-526 | 5.42E+04 |
| 119 | 1490-2374 | 805.050 | 1 | 806.058  | 246-412 | 6.48E+04 |
| 120 | 3792-3794 | 805.051 | 2 | 1612.117 | 574-574 | 1.10E+05 |
| 121 | 1320-1470 | 815.095 | 1 | 816.103  | 217-242 | 1.26E+05 |
| 122 | 1336-1502 | 831.090 | 1 | 832.098  | 220-248 | 5.40E+04 |



|     |           |          |   |          |         |          |
|-----|-----------|----------|---|----------|---------|----------|
| 123 | 1347-1348 | 837.076  | 1 | 838.084  | 222-222 | 6.31E+04 |
| 124 | 1626-2359 | 851.056  | 1 | 852.064  | 271-411 | 7.00E+04 |
| 125 | 2842-4584 | 858.067  | 2 | 1718.150 | 473-652 | 1.81E+05 |
| 126 | 3843-3846 | 859.075  | 2 | 1720.166 | 579-579 | 1.31E+05 |
| 127 | 3663-3666 | 867.072  | 2 | 1736.159 | 562-562 | 2.68E+05 |
| 128 | 3682-3685 | 868.074  | 2 | 1738.165 | 564-564 | 7.93E+05 |
| 129 | 2857-3580 | 869.057  | 2 | 1740.130 | 474-554 | 6.62E+04 |
| 130 | 1637-2376 | 873.037  | 1 | 874.045  | 273-412 | 5.22E+04 |
| 131 | 3327-3810 | 874.080  | 2 | 1750.175 | 528-576 | 2.46E+05 |
| 132 | 3670-3671 | 878.063  | 2 | 1758.141 | 563-563 | 1.00E+05 |
| 133 | 3463-3592 | 880.049  | 2 | 1762.114 | 542-555 | 8.06E+04 |
| 134 | 3817-3821 | 885.071  | 2 | 1772.159 | 576-577 | 1.63E+05 |
| 135 | 3673-3675 | 889.053  | 2 | 1780.123 | 563-563 | 7.42E+04 |
| 136 | 3469-3471 | 891.039  | 2 | 1784.094 | 542-542 | 7.67E+04 |
| 137 | 3828-3829 | 896.062  | 2 | 1794.139 | 577-577 | 5.25E+04 |
| 138 | 4754-4756 | 917.163  | 1 | 918.171  | 669-669 | 6.96E+04 |
| 139 | 3534-4828 | 933.064  | 2 | 1868.144 | 549-676 | 4.19E+05 |
| 140 | 3099-4919 | 933.064  | 1 | 934.072  | 504-687 | 4.25E+05 |
| 141 | 4042-4375 | 934.071  | 2 | 1870.159 | 597-630 | 1.78E+06 |
| 142 | 3891-3895 | 935.079  | 1 | 936.087  | 584-584 | 2.27E+05 |
| 143 | 3985-4449 | 937.088  | 1 | 938.096  | 592-637 | 8.73E+04 |
| 144 | 3014-3015 | 941.062  | 2 | 1884.140 | 493-494 | 5.02E+04 |
| 145 | 3640-4349 | 942.069  | 2 | 1886.154 | 560-628 | 5.61E+04 |
| 146 | 3813-3815 | 944.055  | 2 | 1890.125 | 576-576 | 9.13E+04 |
| 147 | 4009-4387 | 945.062  | 2 | 1892.140 | 594-631 | 1.76E+05 |
| 148 | 4002-4004 | 945.564  | 2 | 1893.145 | 594-594 | 8.87E+04 |
| 149 | 2168-2889 | 949.059  | 2 | 1900.133 | 379-479 | 5.92E+04 |
| 150 | 4672-5203 | 949.060  | 1 | 950.068  | 660-720 | 8.10E+04 |
| 151 | 1710-4328 | 951.074  | 1 | 952.082  | 286-626 | 1.99E+05 |
| 152 | 3495-4933 | 955.046  | 1 | 956.054  | 545-689 | 1.02E+05 |
| 153 | 1361-4185 | 956.052  | 2 | 1914.119 | 224-612 | 2.97E+05 |
| 154 | 3057-3059 | 956.066  | 2 | 1914.147 | 499-499 | 5.60E+04 |
| 155 | 2362-2464 | 957.055  | 2 | 1916.126 | 411-425 | 7.94E+04 |
| 156 | 2173-2174 | 958.064  | 2 | 1918.143 | 380-380 | 5.05E+04 |
| 157 | 4994-5411 | 963.075  | 1 | 964.083  | 695-744 | 6.98E+04 |
| 158 | 640-857   | 963.133  | 1 | 964.141  | 111-144 | 2.40E+05 |
| 159 | 3056-4249 | 965.091  | 1 | 966.099  | 499-618 | 2.27E+05 |
| 160 | 4190-4225 | 967.040  | 2 | 1936.096 | 612-616 | 9.65E+04 |
| 161 | 1849-3248 | 973.056  | 1 | 974.064  | 313-520 | 6.12E+04 |
| 162 | 3586-4474 | 981.086  | 1 | 982.094  | 554-639 | 9.66E+04 |
| 163 | 3803-4238 | 987.072  | 1 | 988.080  | 575-617 | 9.97E+04 |
| 164 | 2780-2781 | 996.135  | 2 | 1994.285 | 465-465 | 5.66E+04 |
| 165 | 3905-3906 | 1003.067 | 1 | 1004.075 | 585-585 | 5.19E+04 |

|     |           |          |   |          |         |          |
|-----|-----------|----------|---|----------|---------|----------|
| 166 | 2774-2777 | 1007.124 | 2 | 2016.265 | 465-465 | 5.25E+04 |
| 167 | 4286-5244 | 1009.070 | 2 | 2020.156 | 622-724 | 9.10E+04 |
| 168 | 3791-4437 | 1018.075 | 2 | 2038.167 | 574-636 | 9.05E+04 |
| 169 | 4291-4687 | 1020.061 | 2 | 2042.138 | 622-662 | 6.55E+04 |
| 170 | 4146-4951 | 1025.084 | 2 | 2052.184 | 607-690 | 1.29E+05 |
| 171 | 3808-3811 | 1029.066 | 2 | 2060.147 | 575-576 | 1.35E+05 |
| 172 | 4300-4713 | 1031.052 | 2 | 2064.119 | 623-664 | 5.91E+04 |
| 173 | 4734-4906 | 1085.075 | 1 | 1086.083 | 667-686 | 7.66E+04 |
| 174 | 3798-3801 | 1103.086 | 1 | 1104.094 | 575-575 | 1.87E+05 |
| 175 | 4187-4191 | 1138.172 | 2 | 2278.361 | 612-612 | 2.53E+05 |
| 176 | 4189-4192 | 1149.162 | 2 | 2300.340 | 612-612 | 1.48E+05 |
| 177 | 4169-4171 | 1158.104 | 2 | 2318.224 | 610-610 | 5.17E+04 |

**Table S-24: Strawberry, Screen [V], T-2RT**

Precursor ions present in strawberry leaves classified as ellagitannins under condition [V] using T-2RT.

| No. | Scan No.  | <i>m/z</i> | Z | Mass    | RT (s)  | Intensity |
|-----|-----------|------------|---|---------|---------|-----------|
| 1   | 5391-5588 | 303.015    | 1 | 304.023 | 601-618 | 1.91E+05  |
| 2   | 3254-4120 | 316.033    | 2 | 634.082 | 401-486 | 1.28E+06  |
| 3   | 1300-5587 | 391.031    | 2 | 784.077 | 165-618 | 3.18E+05  |
| 4   | 3867-5259 | 392.039    | 2 | 786.093 | 461-590 | 1.50E+05  |
| 5   | 1752-1954 | 407.043    | 2 | 816.103 | 221-242 | 1.14E+05  |
| 6   | 3370-3413 | 425.024    | 2 | 852.065 | 412-416 | 6.04E+04  |
| 7   | 2252-3385 | 436.015    | 2 | 874.046 | 275-414 | 5.32E+04  |
| 8   | 3425-3428 | 437.026    | 2 | 876.067 | 417-418 | 5.57E+04  |
| 9   | 6923-6926 | 452.049    | 2 | 906.115 | 745-745 | 2.94E+05  |
| 10  | 2529-5036 | 453.039    | 2 | 908.093 | 309-570 | 3.10E+05  |
| 11  | 3898-3899 | 462.044    | 2 | 926.105 | 464-464 | 6.89E+04  |
| 12  | 3679-4474 | 464.029    | 2 | 930.075 | 444-519 | 1.18E+05  |
| 13  | 6077-6760 | 465.020    | 2 | 932.057 | 663-728 | 2.49E+05  |
| 14  | 4082-6404 | 466.029    | 2 | 934.073 | 481-693 | 1.06E+06  |
| 15  | 5219-5792 | 467.036    | 2 | 936.089 | 586-636 | 3.01E+06  |
| 16  | 5820-5892 | 468.044    | 2 | 938.104 | 639-646 | 1.41E+05  |
| 17  | 3649-6339 | 469.052    | 2 | 940.120 | 441-688 | 1.97E+05  |
| 18  | 3388-3389 | 470.009    | 2 | 942.034 | 414-414 | 5.73E+04  |
| 19  | 2325-5685 | 475.034    | 2 | 952.083 | 285-627 | 1.98E+05  |
| 20  | 4315-4356 | 476.041    | 2 | 954.098 | 504-508 | 1.16E+05  |
| 21  | 4534-6381 | 477.019    | 2 | 956.055 | 525-691 | 2.84E+05  |
| 22  | 5627-5821 | 477.050    | 2 | 956.116 | 622-639 | 1.07E+05  |
| 23  | 5448-5450 | 477.521    | 1 | 478.529 | 606-606 | 2.13E+05  |
| 24  | 5205-5764 | 478.027    | 2 | 958.070 | 585-634 | 5.20E+05  |
| 25  | 4994-6488 | 479.250    | 1 | 480.258 | 566-702 | 5.43E+05  |
| 26  | 5383-5937 | 481.034    | 2 | 964.083 | 601-650 | 2.40E+05  |
| 27  | 788-1149  | 481.063    | 1 | 482.071 | 110-150 | 3.40E+06  |
| 28  | 3602-5793 | 482.041    | 2 | 966.099 | 436-637 | 3.25E+05  |
| 29  | 2370-4487 | 486.024    | 2 | 974.065 | 290-521 | 1.48E+05  |
| 30  | 4952-5839 | 490.039    | 2 | 982.095 | 563-641 | 1.83E+05  |
| 31  | 2035-3407 | 491.028    | 2 | 984.072 | 251-416 | 1.15E+05  |
| 32  | 1772-3745 | 491.047    | 2 | 984.111 | 223-450 | 6.83E+04  |
| 33  | 3781-3784 | 491.177    | 1 | 492.185 | 453-453 | 1.79E+05  |
| 34  | 5432-5435 | 492.172    | 1 | 493.180 | 605-605 | 1.27E+05  |
| 35  | 5071-5611 | 493.033    | 2 | 988.081 | 573-620 | 1.32E+05  |
| 36  | 2514-4482 | 497.015    | 2 | 996.047 | 308-520 | 7.25E+04  |

|    |           |         |   |          |         |          |
|----|-----------|---------|---|----------|---------|----------|
| 37 | 5012-5015 | 498.055 | 2 | 998.126  | 568-568 | 2.67E+05 |
| 38 | 4768-6398 | 511.013 | 2 | 1024.042 | 546-693 | 1.32E+05 |
| 39 | 5207-5778 | 512.021 | 2 | 1026.057 | 585-635 | 1.38E+05 |
| 40 | 5590-5592 | 527.027 | 2 | 1056.070 | 618-618 | 8.05E+04 |
| 41 | 5178-6137 | 529.044 | 2 | 1060.105 | 583-669 | 1.51E+05 |
| 42 | 2537-4490 | 531.009 | 2 | 1064.034 | 310-521 | 8.50E+04 |
| 43 | 4856-5017 | 541.055 | 2 | 1084.126 | 554-569 | 1.10E+05 |
| 44 | 3702-3705 | 542.000 | 2 | 1086.016 | 446-446 | 6.36E+04 |
| 45 | 4117-7001 | 542.034 | 2 | 1086.084 | 485-752 | 3.69E+05 |
| 46 | 810-1108  | 549.050 | 1 | 550.058  | 112-145 | 1.49E+05 |
| 47 | 4214-4217 | 549.053 | 2 | 1100.121 | 495-495 | 9.25E+04 |
| 48 | 5077-5829 | 551.040 | 2 | 1104.095 | 574-640 | 3.50E+05 |
| 49 | 6315-6610 | 553.025 | 2 | 1108.066 | 685-714 | 2.00E+05 |
| 50 | 5527-5529 | 554.045 | 2 | 1110.105 | 613-613 | 1.20E+05 |
| 51 | 1965-2505 | 556.060 | 2 | 1114.136 | 243-307 | 6.66E+04 |
| 52 | 5657-6691 | 558.047 | 2 | 1118.110 | 624-722 | 1.31E+05 |
| 53 | 5179-5224 | 562.030 | 2 | 1126.077 | 583-587 | 1.59E+05 |
| 54 | 4201-4240 | 563.050 | 2 | 1128.116 | 494-498 | 7.61E+04 |
| 55 | 6136-6618 | 564.016 | 2 | 1130.047 | 668-715 | 9.85E+04 |
| 56 | 5905-6710 | 569.038 | 2 | 1140.093 | 647-724 | 6.39E+04 |
| 57 | 1065-3561 | 571.029 | 1 | 572.037  | 142-432 | 7.91E+04 |
| 58 | 5187-5190 | 573.021 | 2 | 1148.059 | 584-584 | 1.14E+05 |
| 59 | 4447-4497 | 598.079 | 2 | 1198.173 | 517-521 | 2.58E+05 |
| 60 | 1292-1528 | 605.078 | 1 | 606.086  | 164-193 | 6.31E+04 |
| 61 | 4421-4614 | 616.090 | 2 | 1234.195 | 514-532 | 9.82E+04 |
| 62 | 5193-5741 | 617.033 | 2 | 1236.081 | 584-632 | 1.25E+06 |
| 63 | 5251-5300 | 628.022 | 2 | 1258.061 | 589-593 | 3.31E+05 |
| 64 | 1419-2575 | 629.042 | 2 | 1260.100 | 179-314 | 6.37E+05 |
| 65 | 3375-4816 | 631.058 | 2 | 1264.131 | 413-550 | 2.23E+05 |
| 66 | 3166-5072 | 631.058 | 1 | 632.066  | 392-573 | 6.38E+05 |
| 67 | 1903-4528 | 631.224 | 1 | 632.232  | 237-524 | 3.99E+05 |
| 68 | 4380-4613 | 632.066 | 2 | 1266.147 | 511-532 | 2.02E+05 |
| 69 | 1334-4283 | 633.074 | 1 | 634.082  | 169-501 | 5.90E+05 |
| 70 | 802-804   | 637.067 | 1 | 638.075  | 111-111 | 4.91E+05 |
| 71 | 3678-3682 | 642.048 | 2 | 1286.112 | 443-444 | 6.42E+04 |
| 72 | 4387-4390 | 643.057 | 2 | 1288.129 | 511-512 | 9.34E+04 |
| 73 | 809-1547  | 649.068 | 1 | 650.076  | 112-195 | 2.29E+05 |
| 74 | 3280-5306 | 655.055 | 1 | 656.063  | 403-594 | 3.28E+05 |
| 75 | 1408-3844 | 663.084 | 1 | 664.092  | 177-459 | 1.47E+05 |
| 76 | 1086-1089 | 665.064 | 1 | 666.072  | 143-144 | 3.03E+05 |
| 77 | 1291-1544 | 671.050 | 1 | 672.058  | 164-195 | 7.70E+04 |
| 78 | 5307-5309 | 675.121 | 2 | 1352.257 | 594-594 | 2.15E+05 |
| 79 | 1074-1075 | 681.059 | 1 | 682.067  | 142-142 | 1.42E+05 |

|     |           |         |   |          |         |          |
|-----|-----------|---------|---|----------|---------|----------|
| 80  | 5308-5310 | 686.111 | 2 | 1374.239 | 594-594 | 1.85E+05 |
| 81  | 1085-1088 | 687.046 | 1 | 688.054  | 143-144 | 3.54E+05 |
| 82  | 6230-6777 | 692.030 | 2 | 1386.075 | 677-730 | 1.78E+05 |
| 83  | 5398-5401 | 701.036 | 2 | 1404.087 | 602-602 | 1.03E+05 |
| 84  | 3301-4677 | 707.064 | 2 | 1416.144 | 405-538 | 6.30E+05 |
| 85  | 6316-6318 | 708.043 | 2 | 1418.102 | 685-686 | 6.70E+04 |
| 86  | 4635-4637 | 716.069 | 2 | 1434.155 | 534-534 | 7.69E+04 |
| 87  | 3819-4022 | 718.054 | 2 | 1438.124 | 457-476 | 2.86E+05 |
| 88  | 3303-4108 | 723.043 | 1 | 724.051  | 405-485 | 1.03E+05 |
| 89  | 3818-4727 | 723.077 | 2 | 1448.170 | 456-542 | 8.66E+04 |
| 90  | 3909-4030 | 729.044 | 2 | 1460.105 | 465-476 | 1.39E+05 |
| 91  | 3919-4023 | 740.037 | 2 | 1482.089 | 466-476 | 6.69E+04 |
| 92  | 5233-5234 | 756.108 | 2 | 1514.232 | 588-588 | 8.17E+04 |
| 93  | 4112-5720 | 782.061 | 2 | 1566.139 | 485-630 | 1.11E+05 |
| 94  | 1275-5514 | 783.069 | 1 | 784.077  | 163-612 | 3.61E+05 |
| 95  | 4251-5422 | 783.069 | 2 | 1568.155 | 498-604 | 5.04E+05 |
| 96  | 3861-4544 | 785.084 | 1 | 786.092  | 461-526 | 1.93E+05 |
| 97  | 1652-2832 | 789.050 | 2 | 1580.116 | 209-350 | 1.48E+05 |
| 98  | 3955-4339 | 791.067 | 2 | 1584.149 | 469-507 | 6.17E+04 |
| 99  | 3381-5127 | 794.060 | 2 | 1590.136 | 413-578 | 2.57E+05 |
| 100 | 2704-3087 | 798.055 | 2 | 1598.127 | 332-384 | 1.88E+05 |
| 101 | 3911-4697 | 799.064 | 1 | 800.072  | 465-540 | 1.01E+05 |
| 102 | 1127-4056 | 801.079 | 1 | 802.087  | 147-479 | 5.63E+04 |
| 103 | 1992-3421 | 805.050 | 1 | 806.058  | 246-417 | 8.82E+04 |
| 104 | 5087-5133 | 805.051 | 2 | 1612.118 | 575-579 | 2.40E+05 |
| 105 | 1721-1953 | 815.095 | 1 | 816.103  | 218-242 | 2.57E+05 |
| 106 | 1748-2043 | 831.090 | 1 | 832.098  | 221-252 | 7.13E+04 |
| 107 | 1767-1768 | 837.076 | 1 | 838.084  | 223-223 | 5.88E+04 |
| 108 | 2208-3435 | 851.056 | 1 | 852.064  | 270-418 | 2.00E+05 |
| 109 | 3997-5656 | 858.067 | 2 | 1718.150 | 473-624 | 3.56E+05 |
| 110 | 5149-5153 | 859.075 | 2 | 1720.165 | 580-580 | 2.06E+05 |
| 111 | 4960-5007 | 867.072 | 2 | 1736.160 | 563-568 | 5.16E+05 |
| 112 | 4015-4894 | 869.057 | 2 | 1740.131 | 475-558 | 1.23E+05 |
| 113 | 2221-3414 | 873.038 | 1 | 874.046  | 272-417 | 7.23E+04 |
| 114 | 4587-5144 | 874.080 | 2 | 1750.176 | 530-580 | 2.63E+05 |
| 115 | 4967-4971 | 878.062 | 2 | 1758.141 | 564-564 | 2.62E+05 |
| 116 | 4733-4888 | 880.048 | 2 | 1762.112 | 543-557 | 1.03E+05 |
| 117 | 5116-5119 | 885.071 | 2 | 1772.159 | 577-577 | 1.78E+05 |
| 118 | 4974-4978 | 889.054 | 2 | 1780.123 | 565-565 | 1.24E+05 |
| 119 | 5160-6221 | 933.064 | 2 | 1868.145 | 581-677 | 4.43E+05 |
| 120 | 4321-6390 | 933.064 | 1 | 934.072  | 505-692 | 5.01E+05 |
| 121 | 5348-5725 | 934.073 | 2 | 1870.161 | 598-631 | 2.24E+06 |
| 122 | 5197-5248 | 935.079 | 1 | 936.087  | 584-589 | 5.49E+05 |

|     |           |          |   |          |         |          |
|-----|-----------|----------|---|----------|---------|----------|
| 123 | 5298-5786 | 937.087  | 1 | 938.095  | 593-636 | 1.43E+05 |
| 124 | 4207-4248 | 941.061  | 2 | 1884.139 | 494-498 | 7.93E+04 |
| 125 | 5736-5740 | 942.070  | 2 | 1886.156 | 631-632 | 3.59E+04 |
| 126 | 5314-5734 | 945.062  | 2 | 1892.140 | 595-631 | 3.62E+05 |
| 127 | 3045-4054 | 949.059  | 2 | 1900.134 | 379-479 | 1.29E+05 |
| 128 | 6057-6754 | 949.059  | 1 | 950.067  | 661-728 | 1.75E+05 |
| 129 | 2334-5277 | 951.074  | 1 | 952.082  | 286-591 | 2.21E+05 |
| 130 | 4769-5463 | 955.047  | 1 | 956.055  | 546-607 | 1.29E+05 |
| 131 | 1799-5552 | 956.051  | 2 | 1914.118 | 226-615 | 1.71E+05 |
| 132 | 3336-3518 | 957.055  | 2 | 1916.127 | 409-428 | 6.01E+04 |
| 133 | 805-806   | 963.133  | 1 | 964.141  | 111-112 | 2.91E+05 |
| 134 | 1791-2072 | 965.053  | 2 | 1932.122 | 225-255 | 1.29E+05 |
| 135 | 4259-5604 | 965.091  | 1 | 966.099  | 499-620 | 1.89E+05 |
| 136 | 5536-5538 | 967.042  | 2 | 1936.100 | 614-614 | 1.13E+05 |
| 137 | 3467-3674 | 972.061  | 2 | 1946.138 | 422-443 | 1.17E+05 |
| 138 | 2557-3249 | 973.056  | 1 | 974.064  | 312-400 | 6.02E+04 |
| 139 | 4880-5840 | 981.086  | 1 | 982.094  | 556-641 | 1.49E+05 |
| 140 | 5581-5584 | 987.072  | 1 | 988.080  | 618-618 | 1.01E+05 |
| 141 | 3920-3922 | 996.136  | 2 | 1994.287 | 466-466 | 5.60E+04 |
| 142 | 3910-3913 | 1007.125 | 2 | 2016.266 | 465-466 | 6.10E+04 |
| 143 | 5630-6382 | 1009.070 | 2 | 2020.156 | 622-691 | 2.57E+05 |
| 144 | 5085-5585 | 1018.075 | 2 | 2038.166 | 575-618 | 2.18E+05 |
| 145 | 5637-6112 | 1020.061 | 2 | 2042.138 | 623-666 | 9.25E+04 |
| 146 | 5464-5666 | 1025.084 | 2 | 2052.184 | 608-625 | 1.19E+05 |
| 147 | 5111-5112 | 1029.065 | 2 | 2060.146 | 577-577 | 1.42E+05 |
| 148 | 5652-6092 | 1031.053 | 2 | 2064.121 | 624-664 | 8.32E+04 |
| 149 | 6129-6332 | 1085.075 | 1 | 1086.083 | 668-687 | 8.72E+04 |
| 150 | 5101-5192 | 1103.086 | 1 | 1104.094 | 576-584 | 1.28E+05 |
| 151 | 5518-5521 | 1138.172 | 2 | 2278.359 | 612-612 | 2.78E+05 |
| 152 | 5520-5522 | 1149.163 | 2 | 2300.342 | 612-612 | 1.34E+05 |
| 153 | 5502-5505 | 1158.105 | 2 | 2318.225 | 611-611 | 1.83E+05 |

**Table S-25: Strawberry, Screen [VI], T-2RT**

Precursor ions present in strawberry leaves classified as ellagitannins under condition [VI] using T-2RT.

| No. | Scan No.  | <i>m/z</i> | Z | Mass     | RT (s)  | Intensity |
|-----|-----------|------------|---|----------|---------|-----------|
| 1   | 3705-3707 | 303.015    | 1 | 304.023  | 602-602 | 1.38E+05  |
| 2   | 2176-2710 | 316.033    | 2 | 634.082  | 404-483 | 2.43E+06  |
| 3   | 1227-4366 | 391.031    | 2 | 784.077  | 224-683 | 3.52E+05  |
| 4   | 3009-3594 | 392.039    | 2 | 786.093  | 523-590 | 1.66E+05  |
| 5   | 1226-1326 | 407.043    | 2 | 816.103  | 224-242 | 1.37E+05  |
| 6   | 2252-2255 | 425.024    | 2 | 852.065  | 416-417 | 8.28E+04  |
| 7   | 2253-2256 | 436.015    | 2 | 874.047  | 417-417 | 5.51E+04  |
| 8   | 2280-2282 | 437.025    | 2 | 876.067  | 420-420 | 6.46E+04  |
| 9   | 4811-4812 | 452.049    | 2 | 906.115  | 746-746 | 1.75E+05  |
| 10  | 1704-3432 | 453.039    | 2 | 908.094  | 313-572 | 5.35E+05  |
| 11  | 3136-3959 | 453.104    | 1 | 454.112  | 537-631 | 1.47E+06  |
| 12  | 2581-2582 | 462.044    | 2 | 926.105  | 464-464 | 5.95E+04  |
| 13  | 2460-2464 | 464.030    | 2 | 930.075  | 447-447 | 2.43E+05  |
| 14  | 2718-4421 | 466.029    | 2 | 934.074  | 484-690 | 1.67E+06  |
| 15  | 3561-3998 | 467.036    | 2 | 936.089  | 587-635 | 3.96E+06  |
| 16  | 2444-2445 | 469.052    | 1 | 470.060  | 444-445 | 6.11E+04  |
| 17  | 2434-4338 | 469.052    | 2 | 940.120  | 443-679 | 2.66E+05  |
| 18  | 1582-3932 | 475.034    | 2 | 952.083  | 289-627 | 2.90E+05  |
| 19  | 2857-2859 | 476.041    | 2 | 954.098  | 504-504 | 1.07E+05  |
| 20  | 3228-4423 | 477.019    | 2 | 956.054  | 548-691 | 5.97E+05  |
| 21  | 3879-4033 | 477.050    | 2 | 956.115  | 621-639 | 9.88E+04  |
| 22  | 3737-3739 | 477.521    | 1 | 478.529  | 605-606 | 2.06E+05  |
| 23  | 3563-4005 | 478.027    | 2 | 958.070  | 587-636 | 6.04E+05  |
| 24  | 3401-4498 | 479.250    | 1 | 480.258  | 569-701 | 9.99E+05  |
| 25  | 3688-4103 | 481.034    | 2 | 964.084  | 600-648 | 2.74E+05  |
| 26  | 601-772   | 481.064    | 1 | 482.072  | 113-144 | 1.29E+07  |
| 27  | 2385-4025 | 482.041    | 2 | 966.099  | 437-638 | 5.70E+05  |
| 28  | 1703-2989 | 486.024    | 2 | 974.065  | 313-521 | 2.34E+05  |
| 29  | 3362-4027 | 490.039    | 2 | 982.095  | 563-638 | 2.90E+05  |
| 30  | 1396-2248 | 491.028    | 2 | 984.073  | 255-416 | 1.56E+05  |
| 31  | 1220-2438 | 491.048    | 2 | 984.111  | 223-444 | 6.60E+04  |
| 32  | 3728-3730 | 492.172    | 1 | 493.180  | 604-605 | 9.81E+04  |
| 33  | 3088-3862 | 493.033    | 2 | 988.081  | 532-619 | 1.72E+05  |
| 34  | 1698-2991 | 497.015    | 2 | 996.047  | 313-522 | 8.45E+04  |
| 35  | 3405-3408 | 498.055    | 2 | 998.126  | 569-570 | 3.07E+05  |
| 36  | 3219-4424 | 511.013    | 2 | 1024.042 | 547-691 | 1.47E+05  |

|    |           |         |   |          |         |          |
|----|-----------|---------|---|----------|---------|----------|
| 37 | 4372-4373 | 511.165 | 1 | 512.173  | 683-683 | 6.69E+04 |
| 38 | 3564-4012 | 512.021 | 2 | 1026.058 | 587-637 | 1.73E+05 |
| 39 | 3467-4146 | 522.004 | 2 | 1046.025 | 576-654 | 1.10E+05 |
| 40 | 3867-3868 | 527.027 | 2 | 1056.070 | 619-619 | 5.92E+04 |
| 41 | 3537-4250 | 529.044 | 2 | 1060.105 | 584-666 | 2.32E+05 |
| 42 | 1695-2997 | 531.009 | 2 | 1064.034 | 312-522 | 8.76E+04 |
| 43 | 3117-3399 | 541.055 | 2 | 1084.126 | 535-569 | 1.46E+05 |
| 44 | 2471-2474 | 542.000 | 2 | 1086.017 | 448-448 | 6.01E+04 |
| 45 | 2735-4866 | 542.034 | 2 | 1086.085 | 487-754 | 6.35E+05 |
| 46 | 4093-4095 | 543.042 | 2 | 1088.100 | 647-647 | 5.23E+04 |
| 47 | 611-765   | 549.050 | 1 | 550.058  | 114-143 | 1.29E+05 |
| 48 | 2800-2803 | 549.052 | 2 | 1100.121 | 496-496 | 7.78E+04 |
| 49 | 3470-4020 | 551.040 | 2 | 1104.095 | 576-637 | 9.14E+05 |
| 50 | 4404-4407 | 553.025 | 2 | 1108.066 | 688-688 | 3.20E+05 |
| 51 | 3819-3822 | 554.045 | 2 | 1110.105 | 614-614 | 6.12E+04 |
| 52 | 3225-3226 | 555.998 | 2 | 1114.012 | 547-547 | 5.70E+04 |
| 53 | 1593-1594 | 556.060 | 2 | 1114.135 | 291-292 | 8.17E+04 |
| 54 | 3912-4647 | 558.047 | 2 | 1118.110 | 625-723 | 1.95E+05 |
| 55 | 3472-3542 | 562.030 | 2 | 1126.076 | 576-584 | 2.24E+05 |
| 56 | 2795-2798 | 563.050 | 2 | 1128.116 | 495-496 | 8.79E+04 |
| 57 | 4276-4400 | 564.016 | 2 | 1130.048 | 670-688 | 1.01E+05 |
| 58 | 583-586   | 566.041 | 1 | 567.049  | 111-112 | 1.41E+05 |
| 59 | 3539-3543 | 573.021 | 2 | 1148.059 | 584-585 | 1.28E+05 |
| 60 | 588-592   | 579.031 | 1 | 580.039  | 112-112 | 1.36E+05 |
| 61 | 3834-3835 | 594.076 | 2 | 1190.167 | 615-615 | 5.84E+04 |
| 62 | 2965-2969 | 598.078 | 2 | 1198.173 | 519-519 | 6.18E+05 |
| 63 | 921-1071  | 605.078 | 1 | 606.086  | 167-193 | 8.01E+04 |
| 64 | 4157-4259 | 611.068 | 2 | 1224.152 | 655-668 | 9.00E+04 |
| 65 | 2945-3097 | 616.089 | 2 | 1234.195 | 516-533 | 9.47E+04 |
| 66 | 3514-3972 | 617.033 | 2 | 1236.081 | 581-632 | 1.56E+06 |
| 67 | 2323-3256 | 631.058 | 2 | 1264.131 | 427-551 | 3.29E+05 |
| 68 | 2123-3422 | 631.058 | 1 | 632.066  | 396-571 | 1.53E+06 |
| 69 | 2919-3083 | 632.066 | 2 | 1266.147 | 512-532 | 4.49E+05 |
| 70 | 950-2824  | 633.074 | 1 | 634.082  | 173-499 | 1.23E+06 |
| 71 | 606-607   | 637.067 | 1 | 638.075  | 113-114 | 1.90E+05 |
| 72 | 2920-2922 | 643.057 | 2 | 1288.130 | 512-513 | 1.11E+05 |
| 73 | 609-1074  | 649.068 | 1 | 650.076  | 114-194 | 3.39E+05 |
| 74 | 2206-3637 | 655.055 | 1 | 656.063  | 409-595 | 4.58E+05 |
| 75 | 2164-2543 | 663.084 | 1 | 664.092  | 403-458 | 3.43E+05 |
| 76 | 4364-4678 | 692.030 | 2 | 1386.076 | 682-727 | 2.59E+05 |
| 77 | 3663-3926 | 701.035 | 2 | 1404.086 | 597-627 | 1.05E+05 |
| 78 | 2202-3155 | 707.064 | 2 | 1416.145 | 408-539 | 6.21E+05 |
| 79 | 4392-4393 | 708.043 | 2 | 1418.101 | 687-687 | 8.31E+04 |



|     |           |         |   |          |         |          |
|-----|-----------|---------|---|----------|---------|----------|
| 80  | 3096-3098 | 716.069 | 2 | 1434.154 | 533-533 | 7.03E+04 |
| 81  | 2538-2607 | 718.054 | 2 | 1438.124 | 458-467 | 3.32E+05 |
| 82  | 2207-2714 | 723.043 | 1 | 724.051  | 409-484 | 1.85E+05 |
| 83  | 2545-3185 | 723.077 | 2 | 1448.169 | 459-543 | 1.11E+05 |
| 84  | 2609-2611 | 729.044 | 2 | 1460.105 | 467-468 | 1.57E+05 |
| 85  | 2610-2650 | 740.037 | 2 | 1482.090 | 467-474 | 8.36E+04 |
| 86  | 2726-3957 | 782.061 | 2 | 1566.138 | 486-631 | 9.67E+04 |
| 87  | 910-2557  | 783.069 | 1 | 784.077  | 165-461 | 5.22E+05 |
| 88  | 2810-3464 | 783.069 | 2 | 1568.155 | 497-575 | 7.01E+05 |
| 89  | 2561-3011 | 785.085 | 1 | 786.093  | 461-523 | 2.54E+05 |
| 90  | 1157-1865 | 789.050 | 2 | 1580.116 | 211-345 | 1.62E+05 |
| 91  | 2626-2887 | 791.067 | 2 | 1584.149 | 470-508 | 6.12E+04 |
| 92  | 2257-3465 | 794.060 | 2 | 1590.135 | 417-575 | 2.85E+05 |
| 93  | 1837-2050 | 798.056 | 2 | 1598.127 | 341-382 | 2.65E+05 |
| 94  | 2614-3166 | 799.064 | 1 | 800.072  | 468-540 | 8.91E+04 |
| 95  | 1032-3036 | 801.079 | 1 | 802.087  | 186-526 | 5.56E+04 |
| 96  | 1372-1476 | 805.050 | 1 | 806.058  | 250-269 | 1.05E+05 |
| 97  | 3462-3466 | 805.051 | 2 | 1612.118 | 575-576 | 1.73E+05 |
| 98  | 1214-1282 | 815.095 | 1 | 816.103  | 222-234 | 4.08E+05 |
| 99  | 3624-3625 | 825.117 | 2 | 1652.250 | 593-594 | 5.56E+04 |
| 100 | 1217-1393 | 831.090 | 1 | 832.098  | 223-254 | 7.15E+04 |
| 101 | 1222-1223 | 837.076 | 1 | 838.084  | 223-224 | 6.18E+04 |
| 102 | 1515-2246 | 851.056 | 1 | 852.064  | 277-416 | 3.26E+05 |
| 103 | 2666-3913 | 858.067 | 2 | 1718.150 | 476-626 | 4.82E+05 |
| 104 | 3506-3507 | 859.075 | 2 | 1720.165 | 580-580 | 1.82E+05 |
| 105 | 3374-3377 | 867.072 | 2 | 1736.160 | 565-565 | 1.18E+06 |
| 106 | 2667-3303 | 869.057 | 2 | 1740.130 | 476-557 | 1.43E+05 |
| 107 | 1516-2254 | 873.038 | 1 | 874.046  | 277-417 | 9.55E+04 |
| 108 | 3070-3492 | 874.080 | 2 | 1750.176 | 530-578 | 4.00E+05 |
| 109 | 3375-3378 | 878.062 | 2 | 1758.140 | 565-565 | 2.13E+05 |
| 110 | 3197-3307 | 880.048 | 2 | 1762.112 | 544-557 | 7.48E+04 |
| 111 | 3493-3495 | 885.072 | 2 | 1772.160 | 578-578 | 1.22E+05 |
| 112 | 4280-4281 | 917.164 | 1 | 918.172  | 670-671 | 5.87E+04 |
| 113 | 2871-4422 | 933.064 | 1 | 934.072  | 506-690 | 7.73E+05 |
| 114 | 4042-4325 | 933.064 | 2 | 1868.145 | 640-677 | 1.54E+05 |
| 115 | 3655-3978 | 934.073 | 2 | 1870.163 | 597-633 | 3.07E+06 |
| 116 | 3562-3566 | 935.080 | 1 | 936.088  | 587-587 | 1.40E+06 |
| 117 | 3991-4016 | 937.088 | 1 | 938.096  | 635-637 | 8.79E+04 |
| 118 | 2794-2797 | 941.061 | 2 | 1884.138 | 495-495 | 1.00E+05 |
| 119 | 3648-3980 | 945.062 | 2 | 1892.140 | 596-633 | 5.10E+05 |
| 120 | 2058-2621 | 949.059 | 2 | 1900.133 | 384-469 | 1.98E+05 |
| 121 | 4196-4675 | 949.060 | 1 | 950.068  | 659-727 | 2.42E+05 |
| 122 | 1589-3933 | 951.074 | 1 | 952.082  | 291-628 | 2.66E+05 |

|     |           |          |   |          |         |          |
|-----|-----------|----------|---|----------|---------|----------|
| 123 | 3220-4425 | 955.046  | 1 | 956.054  | 547-691 | 1.20E+05 |
| 124 | 1237-3805 | 956.051  | 2 | 1914.119 | 226-612 | 1.71E+05 |
| 125 | 2231-2232 | 957.056  | 2 | 1916.128 | 414-414 | 6.07E+04 |
| 126 | 2059-2061 | 958.064  | 2 | 1918.143 | 384-384 | 7.23E+04 |
| 127 | 596-599   | 963.133  | 1 | 964.141  | 113-113 | 1.16E+05 |
| 128 | 2832-3982 | 965.090  | 1 | 966.098  | 500-633 | 2.28E+05 |
| 129 | 3802-3813 | 967.041  | 2 | 1936.098 | 612-613 | 9.37E+04 |
| 130 | 2313-2402 | 972.061  | 2 | 1946.138 | 425-439 | 1.42E+05 |
| 131 | 1712-2999 | 973.056  | 1 | 974.064  | 315-522 | 6.34E+04 |
| 132 | 3290-4034 | 981.086  | 1 | 982.094  | 556-639 | 1.01E+05 |
| 133 | 3451-3863 | 987.073  | 1 | 988.081  | 574-619 | 1.29E+05 |
| 134 | 3902-4440 | 1009.070 | 2 | 2020.155 | 624-692 | 4.74E+05 |
| 135 | 3481-3866 | 1018.075 | 2 | 2038.166 | 577-619 | 3.82E+05 |
| 136 | 3903-4230 | 1020.061 | 2 | 2042.138 | 624-664 | 1.59E+05 |
| 137 | 3773-3888 | 1025.083 | 2 | 2052.183 | 609-622 | 2.09E+05 |
| 138 | 3905-4232 | 1031.051 | 2 | 2064.118 | 625-665 | 5.04E+04 |
| 139 | 4269-4408 | 1085.075 | 1 | 1086.083 | 669-689 | 1.68E+05 |
| 140 | 3471-3545 | 1103.086 | 1 | 1104.094 | 576-585 | 1.05E+05 |
| 141 | 3817-3820 | 1138.171 | 2 | 2278.359 | 613-614 | 1.08E+05 |
| 142 | 3818-3821 | 1149.163 | 2 | 2300.342 | 613-614 | 6.65E+04 |
| 143 | 3792-3794 | 1158.101 | 2 | 2318.219 | 611-611 | 1.08E+05 |

**Table S-26: Strawberry, Screen [VII], T-2RT**

Precursor ions present in strawberry leaves classified as ellagitannins under condition [VII] using T-2RT.

| No. | Scan No.  | <i>m/z</i> | Z | Mass    | RT (s)  | Intensity |
|-----|-----------|------------|---|---------|---------|-----------|
| 1   | 4940-5111 | 303.015    | 1 | 304.023 | 601-618 | 9.34E+04  |
| 2   | 1744947   | 452.923    | 1 | 453.931 | 1-776   | 1.85E+05  |
| 3   | 3353-3354 | 453.540    | 1 | 454.548 | 434-434 | 5.82E+04  |
| 4   | 3437-3438 | 469.052    | 1 | 470.060 | 444-445 | 6.40E+04  |
| 5   | 4589-5936 | 479.250    | 1 | 480.258 | 565-702 | 6.64E+05  |
| 6   | 798-1166  | 481.064    | 1 | 482.072 | 110-150 | 4.14E+06  |
| 7   | 2316-2318 | 486.024    | 1 | 487.032 | 293-293 | 5.01E+04  |
| 8   | 4980-4981 | 490.039    | 1 | 491.047 | 605-605 | 1.46E+05  |
| 9   | 3521-4255 | 491.177    | 1 | 492.185 | 453-533 | 1.70E+05  |
| 10  | 4984-4987 | 492.172    | 1 | 493.180 | 605-605 | 1.24E+05  |
| 11  | 4496-4497 | 497.260    | 1 | 498.268 | 556-556 | 5.07E+04  |
| 12  | 6504-6507 | 541.287    | 1 | 542.295 | 759-759 | 7.85E+04  |
| 13  | 816-1120  | 549.050    | 1 | 550.058 | 112-146 | 1.41E+05  |
| 14  | 4265-4423 | 551.202    | 1 | 552.210 | 534-549 | 9.46E+04  |
| 15  | 3448-3449 | 575.994    | 1 | 577.002 | 446-446 | 5.12E+04  |
| 16  | 1328-1551 | 605.078    | 1 | 606.086 | 167-195 | 7.97E+04  |
| 17  | 4642-4684 | 611.256    | 1 | 612.264 | 570-574 | 5.21E+05  |
| 18  | 2991-4668 | 631.058    | 1 | 632.066 | 392-573 | 6.86E+05  |
| 19  | 1356-3946 | 633.074    | 1 | 634.082 | 170-501 | 5.87E+05  |
| 20  | 808-810   | 637.067    | 1 | 638.075 | 111-111 | 4.79E+05  |
| 21  | 814-1564  | 649.068    | 1 | 650.076 | 112-197 | 2.14E+05  |
| 22  | 3093-4901 | 655.056    | 1 | 656.064 | 403-597 | 2.83E+05  |
| 23  | 2328-3567 | 663.084    | 1 | 664.092 | 294-459 | 1.63E+05  |
| 24  | 1098-1101 | 665.064    | 1 | 666.072 | 144-144 | 3.33E+05  |
| 25  | 1322-1558 | 671.050    | 1 | 672.058 | 167-196 | 8.08E+04  |
| 26  | 1097-1100 | 687.046    | 1 | 688.054 | 144-144 | 4.12E+05  |
| 27  | 3109-3789 | 723.043    | 1 | 724.051 | 405-485 | 1.35E+05  |
| 28  | 5087-5089 | 782.061    | 1 | 783.069 | 615-616 | 7.06E+04  |
| 29  | 1305-5036 | 783.069    | 1 | 784.077 | 165-610 | 3.49E+05  |
| 30  | 3585-4173 | 785.084    | 1 | 786.092 | 461-525 | 1.69E+05  |
| 31  | 3626-4698 | 799.064    | 1 | 800.072 | 465-575 | 6.48E+04  |
| 32  | 1148-3739 | 801.079    | 1 | 802.087 | 148-478 | 5.80E+04  |
| 33  | 1960-3216 | 805.050    | 1 | 806.058 | 247-417 | 8.64E+04  |
| 34  | 1714-1920 | 815.095    | 1 | 816.103 | 218-242 | 2.60E+05  |
| 35  | 1739-2025 | 831.090    | 1 | 832.098 | 221-255 | 7.41E+04  |
| 36  | 1753-1784 | 837.077    | 1 | 838.085 | 223-226 | 5.77E+04  |

|    |           |          |   |          |         |          |
|----|-----------|----------|---|----------|---------|----------|
| 37 | 2158-3211 | 851.056  | 1 | 852.064  | 271-417 | 2.00E+05 |
| 38 | 2167-3202 | 873.038  | 1 | 874.046  | 272-416 | 7.74E+04 |
| 39 | 5627-5628 | 917.163  | 1 | 918.171  | 670-670 | 8.49E+04 |
| 40 | 3980-5835 | 933.064  | 1 | 934.072  | 505-691 | 5.21E+05 |
| 41 | 4774-4815 | 935.080  | 1 | 936.088  | 584-588 | 8.19E+05 |
| 42 | 4862-5278 | 937.087  | 1 | 938.095  | 593-635 | 1.25E+05 |
| 43 | 3747-6208 | 949.059  | 1 | 950.067  | 479-729 | 1.73E+05 |
| 44 | 2264-5190 | 951.075  | 1 | 952.083  | 285-626 | 2.25E+05 |
| 45 | 4389-5812 | 955.046  | 1 | 956.054  | 545-689 | 1.09E+05 |
| 46 | 4863-4866 | 957.062  | 1 | 958.070  | 593-593 | 9.64E+04 |
| 47 | 815-1108  | 963.133  | 1 | 964.141  | 112-144 | 2.23E+05 |
| 48 | 3925-5260 | 965.091  | 1 | 966.099  | 499-633 | 1.55E+05 |
| 49 | 2436-4129 | 973.057  | 1 | 974.065  | 310-521 | 6.27E+04 |
| 50 | 4482-5597 | 981.086  | 1 | 982.094  | 555-667 | 8.67E+04 |
| 51 | 1855-1858 | 983.101  | 1 | 984.109  | 235-235 | 5.26E+04 |
| 52 | 4682-5137 | 987.073  | 1 | 988.081  | 574-620 | 7.32E+04 |
| 53 | 4791-4793 | 1003.065 | 1 | 1004.073 | 585-586 | 5.42E+04 |
| 54 | 5605-5821 | 1085.075 | 1 | 1086.083 | 667-690 | 1.06E+05 |
| 55 | 4688-4802 | 1103.086 | 1 | 1104.094 | 574-587 | 8.60E+04 |

**Table S-27: Strawberry, Screen [VIII], T-2RT**

Precursor ions present in strawberry leaves classified as ellagitannins under condition [VIII] using T-2RT.

| No. | Scan No.  | <i>m/z</i> | Z | Mass     | RT (s)  | Intensity |
|-----|-----------|------------|---|----------|---------|-----------|
| 1   | 1625-2169 | 316.033    | 2 | 634.082  | 401-487 | 8.86E+05  |
| 2   | 574-3694  | 391.031    | 2 | 784.077  | 166-680 | 2.63E+05  |
| 3   | 1976-3232 | 392.038    | 2 | 786.093  | 460-615 | 9.55E+04  |
| 4   | 790-895   | 407.044    | 2 | 816.103  | 221-241 | 1.15E+05  |
| 5   | 1687-1714 | 425.024    | 2 | 852.065  | 412-416 | 6.75E+04  |
| 6   | 1062-1702 | 436.015    | 2 | 874.046  | 278-414 | 5.63E+04  |
| 7   | 1723-1724 | 437.025    | 2 | 876.067  | 417-418 | 5.09E+04  |
| 8   | 4003-4004 | 452.050    | 2 | 906.115  | 744-744 | 2.76E+05  |
| 9   | 1211-2792 | 453.039    | 2 | 908.093  | 310-572 | 2.99E+05  |
| 10  | 2003-2004 | 462.044    | 2 | 926.105  | 464-464 | 6.25E+04  |
| 11  | 1874-2397 | 464.030    | 2 | 930.075  | 444-522 | 1.47E+05  |
| 12  | 3574-3935 | 465.021    | 2 | 932.057  | 660-726 | 2.69E+05  |
| 13  | 2134-3776 | 466.029    | 2 | 934.073  | 481-692 | 9.18E+05  |
| 14  | 2928-3434 | 467.036    | 2 | 936.088  | 584-638 | 2.14E+06  |
| 15  | 4015-4016 | 467.055    | 2 | 936.125  | 747-747 | 5.99E+04  |
| 16  | 3436-3495 | 468.044    | 2 | 938.104  | 638-647 | 1.25E+05  |
| 17  | 1853-3732 | 469.052    | 2 | 940.120  | 441-686 | 1.73E+05  |
| 18  | 1695-1696 | 470.009    | 2 | 942.034  | 413-413 | 5.57E+04  |
| 19  | 2683-3933 | 474.026    | 2 | 950.068  | 559-726 | 2.28E+05  |
| 20  | 1098-3326 | 475.034    | 2 | 952.083  | 286-626 | 2.02E+05  |
| 21  | 3837-3838 | 475.052    | 2 | 952.120  | 706-707 | 7.51E+04  |
| 22  | 2256-3506 | 476.041    | 2 | 954.098  | 504-649 | 9.37E+04  |
| 23  | 2422-3763 | 477.019    | 2 | 956.055  | 525-690 | 2.82E+05  |
| 24  | 3275-3426 | 477.050    | 2 | 956.115  | 621-637 | 1.05E+05  |
| 25  | 2935-3416 | 478.027    | 2 | 958.070  | 585-636 | 4.37E+05  |
| 26  | 3088-3560 | 481.034    | 2 | 964.083  | 600-657 | 2.42E+05  |
| 27  | 1816-3409 | 482.041    | 2 | 966.099  | 435-635 | 3.23E+05  |
| 28  | 2339-2341 | 483.051    | 2 | 968.118  | 515-515 | 5.22E+04  |
| 29  | 1120-2408 | 486.024    | 2 | 974.065  | 289-523 | 1.44E+05  |
| 30  | 2699-3624 | 490.039    | 2 | 982.095  | 561-668 | 1.87E+05  |
| 31  | 939-1728  | 491.028    | 2 | 984.072  | 250-418 | 1.15E+05  |
| 32  | 800-1917  | 491.048    | 2 | 984.112  | 223-449 | 5.98E+04  |
| 33  | 2385-3261 | 493.033    | 2 | 988.081  | 521-619 | 1.14E+05  |
| 34  | 1207-2372 | 497.016    | 2 | 996.047  | 309-519 | 8.27E+04  |
| 35  | 2594-2778 | 498.055    | 2 | 998.126  | 547-570 | 1.29E+05  |
| 36  | 2571-3766 | 511.013    | 2 | 1024.042 | 545-691 | 1.05E+05  |

|    |           |         |   |          |         |          |
|----|-----------|---------|---|----------|---------|----------|
| 37 | 2929-3420 | 512.021 | 2 | 1026.058 | 584-636 | 1.33E+05 |
| 38 | 2577-3540 | 522.004 | 2 | 1046.025 | 545-654 | 9.33E+04 |
| 39 | 3243-3246 | 527.027 | 2 | 1056.070 | 616-617 | 7.34E+04 |
| 40 | 2813-3618 | 529.044 | 2 | 1060.105 | 574-667 | 1.29E+05 |
| 41 | 1219-2380 | 531.009 | 2 | 1064.034 | 311-520 | 8.41E+04 |
| 42 | 2500-2760 | 541.055 | 2 | 1084.126 | 535-568 | 1.12E+05 |
| 43 | 1887-2378 | 542.000 | 2 | 1086.017 | 445-520 | 7.24E+04 |
| 44 | 2159-4043 | 542.034 | 2 | 1086.085 | 485-754 | 3.93E+05 |
| 45 | 3483-3484 | 543.042 | 2 | 1088.100 | 645-646 | 5.16E+04 |
| 46 | 2208-2210 | 549.053 | 2 | 1100.122 | 494-494 | 6.10E+04 |
| 47 | 2319-2321 | 550.060 | 2 | 1102.136 | 513-513 | 5.70E+04 |
| 48 | 2799-3433 | 551.040 | 2 | 1104.095 | 572-638 | 3.22E+05 |
| 49 | 2168-3930 | 553.025 | 2 | 1108.066 | 487-726 | 1.82E+05 |
| 50 | 3192-3195 | 554.044 | 2 | 1110.104 | 612-612 | 1.01E+05 |
| 51 | 2585-3749 | 555.998 | 2 | 1114.012 | 546-688 | 8.00E+04 |
| 52 | 900-1136  | 556.060 | 2 | 1114.135 | 242-293 | 6.50E+04 |
| 53 | 3297-3917 | 558.047 | 2 | 1118.110 | 623-724 | 1.13E+05 |
| 54 | 2812-3417 | 562.030 | 2 | 1126.076 | 574-636 | 1.19E+05 |
| 55 | 2201-2221 | 563.050 | 2 | 1128.116 | 493-497 | 6.28E+04 |
| 56 | 3340-3906 | 569.039 | 2 | 1140.094 | 628-722 | 9.64E+04 |
| 57 | 2910-2946 | 573.022 | 2 | 1148.059 | 582-586 | 8.88E+04 |
| 58 | 3216-3883 | 594.076 | 2 | 1190.168 | 614-716 | 5.95E+04 |
| 59 | 3627-3871 | 598.010 | 2 | 1198.035 | 668-714 | 7.06E+04 |
| 60 | 2347-2375 | 598.079 | 2 | 1198.173 | 516-520 | 4.27E+05 |
| 61 | 2327-2496 | 616.090 | 2 | 1234.195 | 514-534 | 8.70E+04 |
| 62 | 2900-3359 | 617.033 | 2 | 1236.081 | 581-630 | 1.07E+06 |
| 63 | 3329-3331 | 625.029 | 2 | 1252.074 | 626-626 | 5.82E+04 |
| 64 | 2974-3047 | 628.022 | 2 | 1258.061 | 588-595 | 5.38E+05 |
| 65 | 626-1221  | 629.042 | 2 | 1260.101 | 182-311 | 6.65E+05 |
| 66 | 1690-2826 | 631.058 | 2 | 1264.131 | 413-575 | 1.77E+05 |
| 67 | 2296-2463 | 632.066 | 2 | 1266.147 | 510-531 | 1.72E+05 |
| 68 | 1807-1810 | 636.067 | 2 | 1274.150 | 434-435 | 5.39E+04 |
| 69 | 2989-3035 | 639.014 | 2 | 1280.043 | 589-594 | 2.50E+05 |
| 70 | 2305-2336 | 643.057 | 2 | 1288.129 | 511-515 | 8.82E+04 |
| 71 | 1817-1820 | 647.056 | 2 | 1296.128 | 436-436 | 5.39E+04 |
| 72 | 3391-3392 | 666.068 | 2 | 1334.151 | 633-633 | 5.08E+04 |
| 73 | 3056-3059 | 673.123 | 2 | 1348.262 | 596-596 | 6.82E+04 |
| 74 | 3023-3027 | 675.121 | 2 | 1352.258 | 593-593 | 1.03E+05 |
| 75 | 3024-3028 | 686.112 | 2 | 1374.240 | 593-593 | 1.01E+05 |
| 76 | 3673-3958 | 692.030 | 2 | 1386.075 | 676-731 | 1.87E+05 |
| 77 | 3061-3410 | 701.035 | 2 | 1404.086 | 596-635 | 7.21E+04 |
| 78 | 1650-2530 | 707.064 | 2 | 1416.145 | 405-540 | 6.66E+05 |
| 79 | 3720-3747 | 708.043 | 2 | 1418.101 | 685-688 | 6.25E+04 |

|     |           |         |   |          |         |          |
|-----|-----------|---------|---|----------|---------|----------|
| 80  | 2473-2474 | 716.069 | 2 | 1434.153 | 532-532 | 7.70E+04 |
| 81  | 1928-2114 | 718.054 | 2 | 1438.125 | 451-478 | 2.28E+05 |
| 82  | 1959-2543 | 723.077 | 2 | 1448.170 | 457-541 | 7.46E+04 |
| 83  | 2008-2094 | 729.044 | 2 | 1460.104 | 464-476 | 1.36E+05 |
| 84  | 2022-2087 | 740.037 | 2 | 1482.090 | 466-475 | 7.03E+04 |
| 85  | 2954-2957 | 756.107 | 2 | 1514.231 | 586-587 | 5.78E+04 |
| 86  | 2153-3346 | 782.061 | 2 | 1566.139 | 485-628 | 8.85E+04 |
| 87  | 2209-3119 | 783.069 | 2 | 1568.154 | 494-605 | 4.12E+05 |
| 88  | 742-1422  | 789.050 | 2 | 1580.116 | 210-357 | 1.56E+05 |
| 89  | 2040-2272 | 791.067 | 2 | 1584.149 | 468-506 | 5.32E+04 |
| 90  | 1059-2895 | 794.060 | 2 | 1590.136 | 277-581 | 1.45E+05 |
| 91  | 1323-1525 | 798.055 | 2 | 1598.127 | 333-381 | 2.06E+05 |
| 92  | 2803-2857 | 805.051 | 2 | 1612.118 | 573-577 | 9.41E+04 |
| 93  | 3012-3015 | 825.116 | 2 | 1652.249 | 592-592 | 5.49E+04 |
| 94  | 2074-3517 | 858.067 | 2 | 1718.150 | 473-650 | 3.03E+05 |
| 95  | 2870-2913 | 859.075 | 2 | 1720.165 | 578-582 | 8.70E+04 |
| 96  | 2314-2772 | 867.072 | 2 | 1736.160 | 512-569 | 4.22E+05 |
| 97  | 2086-2675 | 869.057 | 2 | 1740.131 | 475-558 | 1.14E+05 |
| 98  | 2445-2871 | 874.080 | 2 | 1750.175 | 529-579 | 2.30E+05 |
| 99  | 2712-2744 | 878.062 | 2 | 1758.141 | 562-566 | 1.33E+05 |
| 100 | 2548-2650 | 880.048 | 2 | 1762.113 | 542-555 | 6.34E+04 |
| 101 | 2831-2880 | 885.071 | 2 | 1772.157 | 575-579 | 6.67E+04 |
| 102 | 2719-2721 | 889.054 | 2 | 1780.124 | 563-563 | 8.73E+04 |
| 103 | 2845-2846 | 896.062 | 2 | 1794.140 | 576-576 | 4.42E+04 |
| 104 | 2729-2730 | 900.044 | 2 | 1802.105 | 564-564 | 5.56E+04 |
| 105 | 2767-3799 | 933.064 | 2 | 1868.144 | 569-696 | 4.51E+05 |
| 106 | 3064-3361 | 934.073 | 2 | 1870.161 | 597-630 | 2.50E+06 |
| 107 | 2205-2225 | 941.061 | 2 | 1884.138 | 494-497 | 7.47E+04 |
| 108 | 2689-3388 | 942.069 | 2 | 1886.153 | 560-633 | 5.64E+04 |
| 109 | 2832-2835 | 944.056 | 2 | 1890.128 | 575-576 | 7.26E+04 |
| 110 | 3037-3369 | 945.062 | 2 | 1892.140 | 594-631 | 3.49E+05 |
| 111 | 3026-3029 | 945.565 | 2 | 1893.146 | 593-593 | 4.35E+04 |
| 112 | 2952-2956 | 946.070 | 2 | 1894.156 | 586-586 | 7.57E+04 |
| 113 | 1515-2113 | 949.059 | 2 | 1900.134 | 379-478 | 1.28E+05 |
| 114 | 3196-3213 | 953.044 | 2 | 1908.103 | 612-614 | 6.78E+04 |
| 115 | 813-3375  | 956.052 | 2 | 1914.119 | 225-631 | 1.62E+05 |
| 116 | 1678-1749 | 957.055 | 2 | 1916.126 | 411-422 | 7.68E+04 |
| 117 | 1522-1541 | 958.064 | 2 | 1918.143 | 381-384 | 9.77E+04 |
| 118 | 2041-2043 | 960.051 | 2 | 1922.118 | 468-469 | 5.03E+04 |
| 119 | 807-1673  | 965.053 | 2 | 1932.123 | 224-410 | 1.31E+05 |
| 120 | 3181-3185 | 967.042 | 2 | 1936.100 | 611-611 | 1.00E+05 |
| 121 | 1744-1860 | 972.061 | 2 | 1946.138 | 422-442 | 1.19E+05 |
| 122 | 2016-2017 | 996.137 | 2 | 1994.290 | 465-465 | 5.68E+04 |

|     |           |          |   |          |         |          |
|-----|-----------|----------|---|----------|---------|----------|
| 123 | 3280-3926 | 1009.070 | 2 | 2020.155 | 621-725 | 2.26E+05 |
| 124 | 2807-3411 | 1018.075 | 2 | 2038.166 | 573-636 | 1.40E+05 |
| 125 | 3286-3606 | 1020.061 | 2 | 2042.138 | 622-665 | 9.80E+04 |
| 126 | 3137-3760 | 1025.084 | 2 | 2052.184 | 607-690 | 1.03E+05 |
| 127 | 2814-2864 | 1029.065 | 2 | 2060.147 | 574-578 | 7.08E+04 |
| 128 | 3290-3591 | 1031.052 | 2 | 2064.120 | 622-663 | 5.21E+04 |
| 129 | 3281-3283 | 1036.075 | 2 | 2074.165 | 621-621 | 4.74E+04 |
| 130 | 3189-3193 | 1138.172 | 2 | 2278.360 | 612-612 | 2.08E+05 |
| 131 | 3191-3194 | 1149.164 | 2 | 2300.344 | 612-612 | 1.16E+05 |
| 132 | 3163-3166 | 1158.103 | 2 | 2318.223 | 609-609 | 5.36E+04 |
| 133 | 3204-3205 | 1160.157 | 2 | 2322.330 | 613-613 | 6.52E+04 |
| 134 | 3173-3176 | 1169.094 | 2 | 2340.204 | 610-610 | 7.42E+04 |



**Table S-28: Strawberry, Screen [IX], T-2RT**

Precursor ions present in strawberry leaves classified as ellagitannins under condition [IX] using T-2RT.

| No. | Scan No.  | <i>m/z</i> | Z | Mass     | RT (s)  | Intensity |
|-----|-----------|------------|---|----------|---------|-----------|
| 1   | 2278-2298 | 316.033    | 2 | 634.082  | 480-484 | 1.96E+06  |
| 2   | 1296-1929 | 391.031    | 2 | 784.077  | 271-418 | 8.14E+05  |
| 3   | 4036-4037 | 452.050    | 2 | 906.115  | 744-744 | 2.91E+05  |
| 4   | 1452-2583 | 453.039    | 2 | 908.093  | 311-530 | 4.48E+05  |
| 5   | 2630-3380 | 453.104    | 1 | 454.112  | 536-632 | 1.39E+06  |
| 6   | 2070-2515 | 464.030    | 2 | 930.075  | 446-520 | 2.68E+05  |
| 7   | 2541-3742 | 466.029    | 2 | 934.073  | 523-690 | 1.55E+06  |
| 8   | 2993-3400 | 467.036    | 2 | 936.088  | 583-635 | 2.50E+06  |
| 9   | 1438-2538 | 475.034    | 2 | 952.083  | 308-523 | 4.69E+05  |
| 10  | 2692-3730 | 477.019    | 2 | 956.054  | 545-688 | 5.74E+05  |
| 11  | 3193-3195 | 477.521    | 1 | 478.529  | 606-606 | 2.75E+05  |
| 12  | 3003-3385 | 478.027    | 2 | 958.070  | 584-633 | 5.94E+05  |
| 13  | 2847-3699 | 479.250    | 1 | 480.258  | 566-683 | 1.04E+06  |
| 14  | 3230-3233 | 481.034    | 2 | 964.083  | 611-611 | 3.12E+05  |
| 15  | 504-708   | 481.063    | 1 | 482.071  | 110-145 | 4.12E+06  |
| 16  | 2390-3405 | 482.041    | 2 | 966.099  | 498-635 | 4.63E+05  |
| 17  | 1451-2514 | 486.024    | 2 | 974.065  | 311-520 | 2.78E+05  |
| 18  | 3276-3278 | 493.032    | 2 | 988.081  | 617-617 | 2.71E+05  |
| 19  | 2856-2857 | 498.055    | 2 | 998.126  | 567-567 | 2.57E+05  |
| 20  | 2917-2918 | 511.013    | 2 | 1024.042 | 574-574 | 2.53E+05  |
| 21  | 3004-3007 | 512.021    | 2 | 1026.058 | 584-585 | 2.71E+05  |
| 22  | 2985-2986 | 529.044    | 2 | 1060.105 | 582-582 | 3.13E+05  |
| 23  | 2755-2756 | 541.055    | 2 | 1084.126 | 554-554 | 3.17E+05  |
| 24  | 3592-3964 | 542.034    | 2 | 1086.085 | 667-732 | 6.34E+05  |
| 25  | 676-677   | 549.050    | 1 | 550.058  | 142-142 | 3.79E+05  |
| 26  | 2904-3406 | 551.039    | 2 | 1104.095 | 573-636 | 5.64E+05  |
| 27  | 3711-3865 | 553.025    | 2 | 1108.066 | 686-713 | 2.70E+05  |
| 28  | 3348-3915 | 558.047    | 2 | 1118.110 | 627-722 | 2.79E+05  |
| 29  | 2988-2989 | 562.030    | 2 | 1126.076 | 582-583 | 3.53E+05  |
| 30  | 519-521   | 566.041    | 1 | 567.049  | 111-111 | 2.87E+05  |
| 31  | 2488-2513 | 598.078    | 2 | 1198.173 | 517-520 | 3.71E+05  |
| 32  | 3027-3128 | 617.033    | 2 | 1236.081 | 587-598 | 2.46E+06  |
| 33  | 3036-3066 | 628.022    | 2 | 1258.061 | 589-592 | 8.09E+05  |
| 34  | 1905-2063 | 631.058    | 2 | 1264.131 | 414-445 | 5.79E+05  |
| 35  | 1789-2869 | 631.058    | 1 | 632.066  | 393-568 | 1.12E+06  |
| 36  | 2450-2472 | 632.066    | 2 | 1266.147 | 510-514 | 3.36E+05  |

|    |           |          |   |          |         |          |
|----|-----------|----------|---|----------|---------|----------|
| 37 | 1595-2318 | 633.074  | 1 | 634.082  | 348-487 | 1.41E+06 |
| 38 | 517-520   | 637.067  | 1 | 638.075  | 111-111 | 4.12E+05 |
| 39 | 531-962   | 649.068  | 1 | 650.076  | 112-197 | 3.47E+05 |
| 40 | 1863-3084 | 655.056  | 1 | 656.064  | 406-594 | 4.29E+05 |
| 41 | 1826-2138 | 663.084  | 1 | 664.092  | 400-457 | 2.75E+05 |
| 42 | 697-699   | 665.064  | 1 | 666.072  | 144-144 | 2.96E+05 |
| 43 | 3079-3080 | 675.121  | 2 | 1352.257 | 593-593 | 2.56E+05 |
| 44 | 695-698   | 687.046  | 1 | 688.054  | 144-144 | 3.66E+05 |
| 45 | 3674-3739 | 692.030  | 2 | 1386.075 | 680-690 | 3.50E+05 |
| 46 | 2097-2250 | 707.064  | 2 | 1416.144 | 450-475 | 1.84E+06 |
| 47 | 2182-2245 | 718.054  | 2 | 1438.124 | 465-474 | 4.55E+05 |
| 48 | 2230-2231 | 729.045  | 2 | 1460.106 | 472-472 | 2.56E+05 |
| 49 | 1187-2153 | 783.069  | 1 | 784.077  | 247-460 | 1.23E+06 |
| 50 | 2622-2966 | 783.069  | 2 | 1568.154 | 535-579 | 9.57E+05 |
| 51 | 2521-2524 | 785.085  | 1 | 786.093  | 521-522 | 2.60E+05 |
| 52 | 2905-2942 | 794.060  | 2 | 1590.136 | 573-576 | 3.86E+05 |
| 53 | 1554-1579 | 798.055  | 2 | 1598.127 | 337-344 | 3.22E+05 |
| 54 | 1064-1135 | 815.095  | 1 | 816.103  | 222-236 | 3.39E+05 |
| 55 | 1310-1919 | 851.056  | 1 | 852.064  | 274-416 | 2.87E+05 |
| 56 | 2239-2831 | 858.067  | 2 | 1718.150 | 474-564 | 4.96E+05 |
| 57 | 2819-2843 | 867.072  | 2 | 1736.160 | 562-565 | 7.49E+05 |
| 58 | 2666-2769 | 869.057  | 2 | 1740.130 | 541-555 | 3.05E+05 |
| 59 | 2922-2957 | 874.080  | 2 | 1750.175 | 574-578 | 4.21E+05 |
| 60 | 2826-2828 | 878.062  | 2 | 1758.140 | 563-563 | 2.91E+05 |
| 61 | 3192-3194 | 933.064  | 2 | 1868.144 | 606-606 | 1.51E+06 |
| 62 | 2684-3748 | 933.064  | 1 | 934.072  | 544-691 | 8.08E+05 |
| 63 | 3114-3366 | 934.073  | 2 | 1870.161 | 597-630 | 2.64E+06 |
| 64 | 2995-3024 | 935.079  | 1 | 936.087  | 584-587 | 8.19E+05 |
| 65 | 3074-3076 | 937.087  | 1 | 938.095  | 593-593 | 3.42E+05 |
| 66 | 3083-3252 | 945.062  | 2 | 1892.140 | 594-614 | 6.23E+05 |
| 67 | 3605-3929 | 949.059  | 1 | 950.067  | 669-725 | 2.68E+05 |
| 68 | 2201-2202 | 949.059  | 2 | 1900.135 | 468-468 | 2.60E+05 |
| 69 | 1444-2533 | 951.074  | 1 | 952.082  | 309-522 | 3.83E+05 |
| 70 | 3231-3234 | 956.052  | 2 | 1914.120 | 611-611 | 3.10E+05 |
| 71 | 525-526   | 963.133  | 1 | 964.141  | 111-112 | 2.71E+05 |
| 72 | 2397-3291 | 965.091  | 1 | 966.099  | 500-619 | 3.89E+05 |
| 73 | 3306-3578 | 1009.070 | 2 | 2020.155 | 621-665 | 5.49E+05 |
| 74 | 2914-2948 | 1018.075 | 2 | 2038.166 | 573-577 | 4.16E+05 |
| 75 | 3316-3317 | 1020.060 | 2 | 2042.136 | 623-623 | 2.78E+05 |
| 76 | 3302-3303 | 1025.083 | 2 | 2052.182 | 621-621 | 2.59E+05 |
| 77 | 3600-3601 | 1085.075 | 1 | 1086.083 | 668-668 | 2.70E+05 |

**Table S-29: Strawberry, Screen [X], T-2RT**

Precursor ions present in strawberry leaves classified as ellagitannins under condition [X] using T-2RT.

| <b>No.</b> | <b>Scan No.</b> | <b><i>m/z</i></b> | <b>Z</b> | <b>Mass</b> | <b>RT (s)</b> | <b>Intensity</b> |
|------------|-----------------|-------------------|----------|-------------|---------------|------------------|
| 1          | 514-716         | 481.063           | 1        | 482.071     | 110-146       | 4.14E+06         |
| 2          | 686-688         | 549.050           | 1        | 550.058     | 142-142       | 5.90E+05         |
| 3          | 524-527         | 566.041           | 1        | 567.049     | 111-111       | 3.13E+05         |
| 4          | 1753-2678       | 631.058           | 1        | 632.066     | 395-569       | 1.41E+06         |
| 5          | 1571-2283       | 633.074           | 1        | 634.082     | 350-499       | 1.32E+06         |
| 6          | 523-526         | 637.067           | 1        | 638.075     | 111-111       | 3.33E+05         |
| 7          | 534-971         | 649.068           | 1        | 650.076     | 112-198       | 3.47E+05         |
| 8          | 1813-2822       | 655.056           | 1        | 656.064     | 407-594       | 5.46E+05         |
| 9          | 1782-2060       | 663.084           | 1        | 664.092     | 401-457       | 2.76E+05         |
| 10         | 700-703         | 665.064           | 1        | 666.072     | 144-144       | 3.46E+05         |
| 11         | 699-702         | 687.046           | 1        | 688.054     | 143-144       | 4.12E+05         |
| 12         | 2185-2186       | 723.043           | 1        | 724.051     | 482-482       | 2.59E+05         |
| 13         | 1177-2074       | 783.069           | 1        | 784.077     | 247-461       | 1.20E+06         |
| 14         | 2397-2400       | 785.085           | 1        | 786.093     | 522-522       | 3.04E+05         |
| 15         | 1061-1126       | 815.095           | 1        | 816.103     | 223-237       | 3.42E+05         |
| 16         | 1303-1862       | 851.056           | 1        | 852.064     | 275-417       | 2.89E+05         |
| 17         | 2532-3390       | 933.064           | 1        | 934.072     | 544-691       | 8.15E+05         |
| 18         | 2764-2782       | 935.080           | 1        | 936.088     | 584-587       | 8.31E+05         |
| 19         | 2814-2816       | 937.087           | 1        | 938.095     | 592-593       | 2.73E+05         |
| 20         | 3560-3561       | 949.059           | 1        | 950.067     | 724-724       | 2.55E+05         |
| 21         | 1435-2407       | 951.074           | 1        | 952.082     | 311-523       | 3.86E+05         |
| 22         | 530-704         | 963.133           | 1        | 964.141     | 111-144       | 2.89E+05         |
| 23         | 2289-2994       | 965.090           | 1        | 966.098     | 500-619       | 3.94E+05         |
| 24         | 3264-3265       | 1085.075          | 1        | 1086.083    | 668-668       | 2.55E+05         |

**Table S-30: Strawberry, Screen [XI], T-2RT**

Precursor ions present in strawberry leaves classified as ellagitannins under condition [XI] using T-2RT.

| No. | Scan No.  | <i>m/z</i> | Z | Mass     | RT (s)  | Intensity |
|-----|-----------|------------|---|----------|---------|-----------|
| 1   | 1719-1747 | 316.033    | 2 | 634.082  | 480-487 | 1.41E+06  |
| 2   | 925-1460  | 391.031    | 2 | 784.077  | 271-418 | 8.10E+05  |
| 3   | 2914-2915 | 452.050    | 2 | 906.115  | 744-744 | 2.92E+05  |
| 4   | 1065-1925 | 453.039    | 2 | 908.093  | 311-530 | 4.63E+05  |
| 5   | 1572-1880 | 464.030    | 2 | 930.075  | 446-520 | 2.69E+05  |
| 6   | 1898-2719 | 466.029    | 2 | 934.074  | 523-690 | 1.69E+06  |
| 7   | 2214-2497 | 467.036    | 2 | 936.088  | 584-635 | 2.44E+06  |
| 8   | 1054-1894 | 475.034    | 2 | 952.083  | 308-523 | 4.48E+05  |
| 9   | 1994-2723 | 477.019    | 2 | 956.054  | 545-691 | 5.15E+05  |
| 10  | 2217-2488 | 478.027    | 2 | 958.070  | 584-633 | 5.49E+05  |
| 11  | 2365-2368 | 481.034    | 2 | 964.084  | 609-610 | 3.02E+05  |
| 12  | 1791-2500 | 482.041    | 2 | 966.099  | 498-636 | 4.82E+05  |
| 13  | 1066-1883 | 486.024    | 2 | 974.065  | 311-521 | 2.67E+05  |
| 14  | 2409-2410 | 493.033    | 2 | 988.081  | 617-617 | 2.57E+05  |
| 15  | 2109-2110 | 498.055    | 2 | 998.125  | 568-568 | 3.19E+05  |
| 16  | 2151-2153 | 511.013    | 2 | 1024.042 | 575-575 | 2.54E+05  |
| 17  | 2221-2223 | 512.021    | 2 | 1026.058 | 585-585 | 2.68E+05  |
| 18  | 2204-2206 | 529.044    | 2 | 1060.105 | 582-583 | 3.79E+05  |
| 19  | 2037-2038 | 541.055    | 2 | 1084.126 | 554-554 | 2.99E+05  |
| 20  | 2621-2872 | 542.034    | 2 | 1086.085 | 667-732 | 6.30E+05  |
| 21  | 2136-2503 | 551.039    | 2 | 1104.095 | 573-636 | 5.94E+05  |
| 22  | 2693-2801 | 553.025    | 2 | 1108.066 | 686-713 | 2.52E+05  |
| 23  | 2463-2833 | 558.047    | 2 | 1118.110 | 627-722 | 2.84E+05  |
| 24  | 2205-2207 | 562.030    | 2 | 1126.077 | 583-583 | 3.12E+05  |
| 25  | 1860-1878 | 598.079    | 2 | 1198.173 | 517-520 | 3.73E+05  |
| 26  | 2238-2304 | 617.033    | 2 | 1236.081 | 588-598 | 2.03E+06  |
| 27  | 2243-2269 | 628.022    | 2 | 1258.061 | 588-592 | 5.16E+05  |
| 28  | 1451-1696 | 631.058    | 2 | 1264.132 | 415-475 | 5.44E+05  |
| 29  | 1834-1849 | 632.066    | 2 | 1266.147 | 510-514 | 3.71E+05  |
| 30  | 2670-2716 | 692.030    | 2 | 1386.075 | 680-690 | 3.35E+05  |
| 31  | 1589-1711 | 707.064    | 2 | 1416.145 | 450-478 | 1.38E+06  |
| 32  | 1644-1693 | 718.054    | 2 | 1438.125 | 465-475 | 4.13E+05  |
| 33  | 1679-1680 | 729.045    | 2 | 1460.107 | 472-472 | 2.76E+05  |
| 34  | 1948-2185 | 783.069    | 2 | 1568.155 | 535-579 | 1.01E+06  |
| 35  | 2137-2167 | 794.060    | 2 | 1590.135 | 573-576 | 3.95E+05  |
| 36  | 1168-1193 | 798.055    | 2 | 1598.127 | 338-345 | 3.18E+05  |

|    |           |          |   |          |         |          |
|----|-----------|----------|---|----------|---------|----------|
| 37 | 1687-2088 | 858.067  | 2 | 1718.150 | 474-564 | 5.06E+05 |
| 38 | 2188-2189 | 859.074  | 2 | 1720.165 | 579-580 | 2.54E+05 |
| 39 | 2080-2102 | 867.072  | 2 | 1736.160 | 562-566 | 6.72E+05 |
| 40 | 1975-2043 | 869.057  | 2 | 1740.130 | 542-555 | 2.94E+05 |
| 41 | 2150-2178 | 874.079  | 2 | 1750.175 | 574-578 | 4.78E+05 |
| 42 | 2085-2087 | 878.062  | 2 | 1758.140 | 563-563 | 2.63E+05 |
| 43 | 2342-2343 | 933.064  | 2 | 1868.144 | 606-606 | 1.49E+06 |
| 44 | 2296-2475 | 934.073  | 2 | 1870.163 | 597-630 | 3.28E+06 |
| 45 | 2279-2390 | 945.062  | 2 | 1892.140 | 594-613 | 5.30E+05 |
| 46 | 1661-1662 | 949.059  | 2 | 1900.135 | 468-468 | 3.13E+05 |
| 47 | 2375-2376 | 956.052  | 2 | 1914.121 | 610-611 | 4.22E+05 |
| 48 | 2434-2612 | 1009.070 | 2 | 2020.155 | 622-665 | 5.10E+05 |
| 49 | 2142-2172 | 1018.075 | 2 | 2038.166 | 573-577 | 3.76E+05 |
| 50 | 2443-2444 | 1020.060 | 2 | 2042.136 | 623-624 | 2.71E+05 |
| 51 | 2358-2431 | 1025.083 | 2 | 2052.183 | 608-621 | 2.61E+05 |
| 52 | 2385-2386 | 1138.172 | 2 | 2278.360 | 612-612 | 2.44E+05 |

**Table S-31: Strawberry, Summary of Screens [I-XI], T-3RT**

Precursor ions present in strawberry leaves classified as ellagitannins under conditions [I-XI] using T-3RT.

| T-3RT           | I.        | II.      | III.      | IV.       | V.        | VI. | VII. | VIII. | IX. | X  | XI. |
|-----------------|-----------|----------|-----------|-----------|-----------|-----|------|-------|-----|----|-----|
| Anions          | 13        | 14       | 0         | <b>23</b> | <b>23</b> | 16  | 22   | 0     | 16  | 15 | 0   |
| < 5e5 Intensity | 6         | 6        | 0         | 19        | <b>20</b> | 11  | 18   | 0     | 9   | 10 | 0   |
| > 5e5 Intensity | 7         | <b>8</b> | 0         | 4         | 3         | 5   | 4    | 0     | 7   | 5  | 0   |
| < 900 Da        | 10        | 10       | 0         | 15        | <b>17</b> | 11  | 14   | 0     | 11  | 10 | 0   |
| < 1100 Da       | 13        | 14       | 0         | <b>22</b> | <b>22</b> | 16  | 21   | 0     | 16  | 15 | 0   |
| >1100 Da        | 0         | 0        | 0         | 1         | 1         | 0   | 1    | 0     | 0   | 0  | 0   |
| Dianions        | 20        | 0        | <b>29</b> | 20        | 25        | 18  | 0    | 20    | 14  | 0  | 12  |
| < 5e5 Intensity | 5         | 0        | <b>16</b> | 14        | 15        | 11  | 0    | 13    | 5   | 0  | 3   |
| > 5e5 Intensity | <b>15</b> | 0        | 13        | 6         | 10        | 7   | 0    | 7     | 9   | 0  | 9   |
| < 900 Da        | 1         | 0        | <b>4</b>  | 1         | 3         | 2   | 0    | 1     | 0   | 0  | 0   |
| < 1100 Da       | 10        | 0        | <b>16</b> | 8         | 14        | 11  | 0    | 12    | 7   | 0  | 7   |
| >1100 Da        | 10        | 0        | <b>13</b> | 12        | 11        | 7   | 0    | 8     | 7   | 0  | 5   |
| Total           | 33        | 14       | 29        | 43        | <b>48</b> | 34  | 22   | 20    | 30  | 15 | 12  |
| < 5e5 Intensity | 11        | 6        | 16        | 33        | <b>35</b> | 22  | 18   | 13    | 14  | 10 | 3   |
| > 5e5 Intensity | <b>22</b> | 8        | 13        | 10        | 13        | 12  | 4    | 7     | 16  | 5  | 9   |
| Unique Mass     | 29        | 14       | 29        | 38        | <b>42</b> | 29  | 22   | 20    | 27  | 15 | 12  |

\*I. (Intensity), II. (Anion), III. (Dianion), IV. (DE 12s), V. (DE 3s), VI. (DE 3s, Apex), VII. (-1, DE 3s), VIII. (-2, DE 3s), IX. (DE 3s, 5e5), X. (-1, DE 3s, 5e5), XI. (-2, DE 3s, 5e5)

**Table S-32: Referenced Annotated Ellagitannins**

Concatenation of previously reported species classified as ellagitannins in strawberry leaves, strawberry fruit, and non-strawberry plant sources and associated references.

| <u>Plant Source</u> | <u>Ref.</u> | <u>E No.</u> | <u>Ellagitannin</u>            | <u>MW</u> | <u>Mass (Da)</u> | <u>CID Fragment (m/z)</u>                         | <u>HCD NCE 20 Fragments (m/z)</u>                    |
|---------------------|-------------|--------------|--------------------------------|-----------|------------------|---------------------------------------------------|------------------------------------------------------|
| Strawberry Leaves   | 64          | E1           | 2,3-(S)-HHDP-glucose           |           | 482.070          | 301.00                                            |                                                      |
| Strawberry Leaves   | 64          | E3           | galloyl-HHDP-glucose a         |           | 634.081          | 300.92                                            |                                                      |
| Strawberry Leaves   | 64          | E4           | galloyl-HHDP-glucose b         |           | 634.081          | 300.92                                            |                                                      |
| Strawberry Leaves   | 64          | E5           | galloyl-HHDP-glucose c         |           | 634.081          | 300.92                                            |                                                      |
| Strawberry Leaves   | 64          | E2           | pedunculagin                   |           | 784.076          | 301.04                                            |                                                      |
| Strawberry Leaves   | 64          | E6           | tellimagrandin I               |           | 786.092          | 300.97                                            |                                                      |
| Strawberry Leaves   | 64          | E7           | dimeric ellagitannin 1416 Da   |           | 1416.141         | 300.97                                            |                                                      |
| Strawberry Leaves   | 64          | E8           | dimeric ellagitannin 1718 Da a |           | 1718.147         | 300.96                                            |                                                      |
| Strawberry Leaves   | 64          | E9           | dimeric ellagitannin 1718 Da b |           | 1718.147         | 300.96                                            |                                                      |
| Strawberry Leaves   | 64          | E10          | dimeric ellagitannin 1718 Da c |           | 1718.147         | 300.96                                            |                                                      |
| Strawberry Leaves   | 64          | E17          | dimeric ellagitannin 1870 Da   |           | 1870.158         | 300.99                                            |                                                      |
| Strawberry Leaves   | 64          | E18          | agrimoniin                     |           | 1870.158         | 300.99                                            |                                                      |
| Strawberry Leaves   | 73          | E24          | Agrimoniin                     | 1871      |                  |                                                   |                                                      |
| Strawberry Leaves   | 64          | E11          | dimeric ellagitannin 2020 Da a |           | 2020.153         | 300.99                                            |                                                      |
| Strawberry Leaves   | 64          | E12          | dimeric ellagitannin 2020 Da b |           | 2020.153         | 300.99                                            |                                                      |
| Strawberry Leaves   | 64          | E13          | dimeric ellagitannin 2020 Da c |           | 2020.153         | 300.99                                            |                                                      |
| Strawberry Leaves   | 64          | E14          | dimeric ellagitannin 2020 Da d |           | 2020.153         | 300.99                                            |                                                      |
| Strawberry Leaves   | 64          | E15          | dimeric ellagitannin 2038 Da a |           | 2038.164         | 300.96                                            |                                                      |
| Strawberry Leaves   | 64          | E16          | dimeric ellagitannin 2038 Da b |           | 2038.164         | 300.96                                            |                                                      |
| Strawberry Leaves   | 64          | E19          | trimeric ellagitannin 2502 Da  |           | 2502.223         | 301.00                                            |                                                      |
| Strawberry Leaves   | 64          | E20          | trimeric ellagitannin 2804 Da  |           | 2804.229         | 300.99                                            |                                                      |
| Strawberry Fruit    | 62          | E3           | Galloyl pentose                |           | 302.065          |                                                   | 169.013; 149.995; 125.023                            |
| Strawberry Fruit    | 72          | E5           | Galloyl glucose                |           | 332.111          | 313; 289; 287; 271;<br>235; 203; 169; 165;<br>127 |                                                      |
| Strawberry Fruit    | 62          | E16          | Digalloyl hexose               |           | 484.087          |                                                   | 331.067; 313.057                                     |
| Strawberry Fruit    | 62          | E4           | Galloyl-HHDP-hexose            |           | 634.081          |                                                   | 633.073; 481.062; 463.051; 331.067; 300.999; 275.020 |
| Strawberry Fruit    | 62          | E5           | Galloyl-HHDP-hexose            |           | 634.081          |                                                   | 633.073; 481.062; 463.051; 331.067; 300.999; 275.020 |
| Strawberry Fruit    | 62          | E8           | Galloyl-HHDP-hexose            |           | 634.081          |                                                   | 633.073; 481.062; 463.051; 331.067; 300.999; 275.020 |
| Strawberry Fruit    | 72          | E6           | Trigalloyl glucose             |           | 636.096          | 465                                               |                                                      |
| Strawberry Fruit    | 62          | E17          | Trigalloyl hexose              |           | 636.099          |                                                   | 465.067; 313.056; 483.077;                           |
| Strawberry Fruit    | 72          | E1           | Bis-HHDP-glucose               |           | 784.075          | 481; 301; 275                                     |                                                      |
| Strawberry Fruit    | 62          | E7           | Digalloyl-HHDP-hexose          |           | 786.092          |                                                   | 633.074; 615.063; 463.053; 483.078; 313.057; 300.999 |
| Strawberry Fruit    | 62          | E13          | Digalloyl-HHDP-hexose          |           | 786.092          |                                                   | 633.074; 615.063; 463.053; 483.078; 313.057; 300.999 |

|                  |    |     |                                                   |          |                                    |                                                                                              |
|------------------|----|-----|---------------------------------------------------|----------|------------------------------------|----------------------------------------------------------------------------------------------|
| Strawberry Fruit | 62 | E27 | Tetragalloyl hexose                               | 788.111  |                                    | 787.096; 635.088; 617.078; 465.068; 300.999; 169.013                                         |
| Strawberry Fruit | 62 | E9  | Galloyl-HHDP-hexose-HHDP (castalagin, vescalagin) | 934.073  |                                    | 915.051; 631.058; 479.046; 461.038; 300.999                                                  |
| Strawberry Fruit | 62 | E10 | Galloyl-HHDP-hexose-HHDP (castalagin, vescalagin) | 934.073  |                                    | 915.051; 631.058; 479.046; 461.038; 300.999                                                  |
| Strawberry Fruit | 62 | E12 | Galloyl-HHDP-hexose-HHDP (castalagin, vescalagin) | 934.073  |                                    | 915.051; 631.058; 479.046; 461.038; 300.999                                                  |
| Strawberry Fruit | 62 | E19 | Galloyl-HHDP-hexose-HHDP (castalagin, vescalagin) | 934.074  |                                    | 915.051; 631.058; 479.046; 461.038; 300.999                                                  |
| Strawberry Fruit | 72 | E7  | Galloyl bis-hexahydroxydiphenoyl (HHDP)-glucose   | 936.085  | 633; 301                           |                                                                                              |
| Strawberry Fruit | 62 | E20 | Galloyl-diHHDP-hexose (casuarictin, potentillin)  | 936.086  |                                    | 935.081; 783.069; 765.057; 633.073; 463.052; 300.999                                         |
| Strawberry Fruit | 62 | E21 | Galloyl-diHHDP-hexose (casuarictin, potentillin)  | 936.086  |                                    | 935.081; 783.069; 765.057; 633.073; 463.052; 300.999                                         |
| Strawberry Fruit | 62 | E26 | Galloyl-diHHDP-hexose (casuarictin, potentillin)  | 936.086  |                                    | 935.081; 783.069; 765.057; 633.073; 463.052; 300.999                                         |
| Strawberry Fruit | 62 | E22 | Trigalloyl-HHDP hexose                            | 938.103  |                                    | 937.095; 785.079; 767.074; 635.198; 465.067; 300.999                                         |
| Strawberry Fruit | 62 | E23 | Trigalloyl-HHDP hexose                            | 938.103  |                                    | 937.095; 785.079; 767.074; 635.198; 465.067; 300.999                                         |
| Strawberry Fruit | 62 | E29 | Pentagalloyl hexose                               | 940.126  |                                    | 939.112; 787.098; 769.089; 617.080; 599.070; 447.059; 300.999; 169.014                       |
| Strawberry Fruit | 72 | E2  | Unknown Ellagitannin                              | 948.051  | 929; 901; 883; 875                 |                                                                                              |
| Strawberry Fruit | 62 | E1  | Galloyl-HHDP-DHHDP-hexose (geraniin)              | 952.083  |                                    | 907.085; 781.054; 605.079; 479; 425.025; 298; 273.004;                                       |
| Strawberry Fruit | 62 | E2  | Galloyl-HHDP-DHHDP-hexose (geraniin)              | 952.083  |                                    | 907.085; 781.054; 605.079; 479; 425.025; 298; 273.004;                                       |
| Strawberry Fruit | 62 | E6  | Galloyl-HHDP-DHHDP-hexose (geraniin)              | 952.083  |                                    | 907.085; 781.054; 605.079; 479; 425.025; 298; 273.004;                                       |
| Strawberry Fruit | 62 | E11 | Galloyl-HHDP-DHHDP-hexose (geraniin)              | 952.083  |                                    | 907.085; 781.054; 605.079; 479; 425.025; 298; 273.004;                                       |
| Strawberry Fruit | 62 | E14 | Galloyl-HHDP-DHHDP-hexose (geraniin)              | 952.083  |                                    | 907.085; 781.054; 605.079; 479; 425.025; 298; 273.004;                                       |
| Strawberry Fruit | 62 | E15 | Galloyl-HHDP-DHHDP-hexose (geraniin)              | 952.083  |                                    | 907.085; 781.054; 605.079; 479; 425.025; 298; 273.004;                                       |
| Strawberry Fruit | 62 | E18 | Galloyl-HHDP-DHHDP-hexose (geraniin)              | 952.083  |                                    | 907.085; 781.054; 605.079; 479; 425.025; 298; 273.004;                                       |
| Strawberry Fruit | 62 | E24 | Sanguiin h10                                      | 1568.150 |                                    | 1415.141; 1265.137; 1103.059; 1085.076; 633.074; 935.081; 783.069; 481.061                   |
| Strawberry Fruit | 62 | E25 | Sanguiin h10                                      | 1568.150 |                                    | 1415.141; 1265.137; 1103.059; 1085.076; 633.074; 935.081; 783.069; 481.061                   |
| Strawberry Fruit | 62 | E28 | Galloyl-diHHDP-hexose dimer                       | 1870.146 |                                    | 1869.143; 1567.152; 1265.140; 1085.076; 935.082; 783.068; 633.074; 613.049; 481.064; 301.000 |
| Strawberry Fruit | 72 | E3  | Unknown Ellagitannin                              | 1918.139 | 1557; 1224; 1099; 1096; 986; 967   |                                                                                              |
| Strawberry Fruit | 72 | E4  | Unknown Ellagitannin                              | 1934.135 | 1859; 948; 947; 942; 929; 921; 920 |                                                                                              |
| Not Strawberry   | 73 | E21 | Isostrictinin                                     | 634      |                                    |                                                                                              |
| Not Strawberry   | 74 | E6  | Isostrictinin                                     | 634.08   |                                    |                                                                                              |
| Not Strawberry   | 74 | E9  | Corilagin                                         | 634.08   |                                    |                                                                                              |
| Not Strawberry   | 74 | E10 | Chebulanin                                        | 652.09   |                                    |                                                                                              |
| Not Strawberry   | 73 | E20 | Pedunculagin                                      | 784      |                                    |                                                                                              |
| Not Strawberry   | 74 | E16 | Pedunculagin                                      | 784.08   |                                    |                                                                                              |
| Not Strawberry   | 32 | E15 | pedunculagin                                      | 784.5    | 301                                |                                                                                              |
| Not Strawberry   | 73 | E22 | Tellimagrandin I                                  | 786      |                                    |                                                                                              |
| Not Strawberry   | 74 | E18 | Tellimagrandin I                                  | 786.09   |                                    |                                                                                              |
| Not Strawberry   | 32 | E1  | tellimagrandin I                                  | 786.6    | 301                                |                                                                                              |
| Not Strawberry   | 73 | E1  | Vescalagin                                        | 934      |                                    |                                                                                              |
| Not Strawberry   | 73 | E4  | Castalagin                                        | 934      |                                    |                                                                                              |
| Not Strawberry   | 74 | E3  | Vescalagin                                        | 934.07   |                                    |                                                                                              |
| Not Strawberry   | 74 | E4  | Castalagin                                        | 934.07   |                                    |                                                                                              |
| Not Strawberry   | 32 | E8  | vescalagin                                        | 934.6    | 301                                |                                                                                              |



|                |    |     |                                       |        |         |         |  |
|----------------|----|-----|---------------------------------------|--------|---------|---------|--|
| Not Strawberry | 32 | E9  | castalagin                            | 934.6  |         | 301     |  |
| Not Strawberry | 73 | E5  | Stachyurin                            | 936    |         |         |  |
| Not Strawberry | 73 | E9  | Casuarinin                            | 936    |         |         |  |
| Not Strawberry | 73 | E19 | Casuarictin                           | 936    |         |         |  |
| Not Strawberry | 74 | E5  | Stachyurin                            |        | 936.09  |         |  |
| Not Strawberry | 74 | E8  | Casuarinin                            |        | 936.09  |         |  |
| Not Strawberry | 74 | E12 | Casuarictin                           |        | 936.09  |         |  |
| Not Strawberry | 74 | E15 | PGG                                   |        | 940.12  |         |  |
| Not Strawberry | 73 | E3  | Methyl derivative of vescalagin       | 948    |         |         |  |
| Not Strawberry | 73 | E7  | Methyl derivative of stachyurin       | 950    |         |         |  |
| Not Strawberry | 74 | E11 | Geraniin                              |        | 952.08  |         |  |
| Not Strawberry | 32 | E18 | geraniin                              | 952.6  |         | 301     |  |
| Not Strawberry | 74 | E13 | Chebulagic acid                       |        | 954.10  |         |  |
| Not Strawberry | 32 | E16 | chebulagic acid                       | 954.7  |         | 301     |  |
| Not Strawberry | 74 | E14 | Chebulinic acid                       |        | 956.11  |         |  |
| Not Strawberry | 73 | E8  | Pterocararin A                        | 1068   |         |         |  |
| Not Strawberry | 74 | E17 | Punicalagin                           |        | 1084.07 |         |  |
| Not Strawberry | 32 | E17 | punicalagin                           | 1084.7 |         | 301     |  |
| Not Strawberry | 73 | E10 | Vescavaloninic acid                   | 1102   |         |         |  |
| Not Strawberry | 73 | E11 | Castavaloninic acid                   | 1102   |         |         |  |
| Not Strawberry | 74 | E1  | Vescavaloninic acid                   |        | 1102.08 |         |  |
| Not Strawberry | 74 | E2  | Castavaloninic acid                   |        | 1102.08 |         |  |
| Not Strawberry | 32 | E10 | vescavaloninic acid                   | 1102.7 |         | 301     |  |
| Not Strawberry | 32 | E11 | castavaloninic acid                   | 1102.7 |         | 301     |  |
| Not Strawberry | 73 | E12 | Hippophaenin B                        | 1104   |         |         |  |
| Not Strawberry | 74 | E7  | Hippophaenin B                        |        | 1104.09 |         |  |
| Not Strawberry | 73 | E14 | Methyl derivative of hippophaenin B   | 1118   |         |         |  |
| Not Strawberry | 73 | E2  | Catechin derivative of vescalagin     | 1206   |         |         |  |
| Not Strawberry | 73 | E6  | Catechin derivative of stachyurin     | 1208   |         |         |  |
| Not Strawberry | 73 | E15 | Elaeagnatin A                         | 1236   |         |         |  |
| Not Strawberry | 73 | E13 | Catechin derivative of hippophaenin B | 1376   |         |         |  |
| Not Strawberry | 74 | E19 | Oenothien B                           |        | 1568.15 |         |  |
| Not Strawberry | 73 | E27 | Oenothien B                           | 1569   |         |         |  |
| Not Strawberry | 32 | E2  | oenothien B                           | 1569.1 |         | 765,301 |  |
| Not Strawberry | 32 | E13 | sanguiin H10                          | 1569.1 |         | 301     |  |
| Not Strawberry | 73 | E16 | Roburin A                             | 1851   |         |         |  |
| Not Strawberry | 73 | E17 | Methyl derivative of roburin A        | 1865   |         |         |  |
| Not Strawberry | 74 | E20 | Cocciferin D2                         |        | 1868.14 |         |  |
| Not Strawberry | 73 | E18 | Cocciferin D2                         | 1869   |         |         |  |
| Not Strawberry | 32 | E12 | cocciferin D2                         | 1869.3 |         | 301     |  |
| Not Strawberry | 74 | E22 | Sanguiin H-6                          |        | 1870.16 |         |  |

|                |    |     |                |        |         |     |  |
|----------------|----|-----|----------------|--------|---------|-----|--|
| Not Strawberry | 74 | E23 | Agrimoniin     |        | 1870.16 |     |  |
| Not Strawberry | 73 | E26 | Sanguiin H-6   | 1871   |         |     |  |
| Not Strawberry | 32 | E4  | sanguiin H6    | 1871.3 |         | 301 |  |
| Not Strawberry | 32 | E6  | agrimoniin     | 1871.3 |         | 301 |  |
| Not Strawberry | 73 | E23 | Gemin A        | 1873   |         |     |  |
| Not Strawberry | 32 | E7  | gemin A        | 1873.3 |         | 301 |  |
| Not Strawberry | 32 | E14 | rugosin D      | 1875.3 |         | 301 |  |
| Not Strawberry | 32 | E3  | oenothein A    | 2353.6 |         | 301 |  |
| Not Strawberry | 74 | E21 | Lambertianin C |        | 2804.23 |     |  |
| Not Strawberry | 73 | E25 | Lambertainin C | 2805   |         |     |  |
| Not Strawberry | 32 | E5  | lambertianin C | 2805.9 |         | 301 |  |

**Table S-33: Screen [IV], T-2RT Comparison Match Strawberry Leaves**

Comparison of 154 non-isomeric ellagitannins (NIE's) present in strawberry leaves with 11 previously reported species in the same plant tissue.

| NIE No.       | Matched Fragment(s) (m/z) | Precursor Δ (Da) | Mass (Da) | Reported Mass (Da) | Reported Fragment (m/z) | Ref.  | E No.              | Ellagitannin                             |
|---------------|---------------------------|------------------|-----------|--------------------|-------------------------|-------|--------------------|------------------------------------------|
| 2R_IV_NIE_1   | 300.999                   | 0.002            | 482.072   | 482.070            | 301.00                  | 64    | E1                 | 2,3-(S)-HHDP-glucose                     |
| 2R_IV_NIE_12  | 300.999; 300.918          | 0                | 634.081   | 634.081            | 300.92                  | 64    | E3, E4, E5         | galloyl-HHDP-glucose a-c                 |
| 2R_IV_NIE_22  | 300.999                   | 0.001            | 784.077   | 784.076            | 301.04                  | 64    | E2                 | pedunculagin                             |
| 2R_IV_NIE_23  | 300.998                   | 0                | 786.092   | 786.092            | 300.97                  | 64    | E6                 | tellimagrandin I                         |
| 2R_IV_NIE_105 | 300.998                   | 0.004            | 1416.145  | 1416.141           | 300.97                  | 64    | E7                 | dimeric ellagitannin 1416 Da             |
| 2R_IV_NIE_119 | 300.998                   | 0.003            | 1718.150  | 1718.147           | 300.96                  | 64    | E8, E9, E10        | dimeric ellagitannin 1718 Da a-c         |
| 2R_IV_NIE_132 | 300.999                   | 0.001            | 1870.159  | 1870.158           | 300.99                  | 73,64 | E24; E17, E18      | agrimoniin, dimeric ellagitannin 1870 Da |
| 2R_IV_NIE_146 | 300.999                   | 0.003            | 2020.156  | 2020.153           | 300.99                  | 64    | E11, E12, E13, E14 | dimeric ellagitannin 2020 Da a-d         |
| 2R_IV_NIE_147 | 300.999                   | 0.003            | 2038.167  | 2038.164           | 300.96                  | 64    | E15, E16           | dimeric ellagitannin 2038 Da a-b         |
|               |                           |                  |           | 2502.223           | 301.00                  | 64    | E19                | trimeric ellagitannin 2502 Da            |
|               |                           |                  |           | 2804.229           | 300.99                  | 64    | E20                | trimeric ellagitannin 2804 Da            |
| 2R_IV_NIE_2   | N/A                       | N/A              | 491.047   |                    |                         |       |                    |                                          |
| 2R_IV_NIE_3   | N/A                       | N/A              | 492.185   |                    |                         |       |                    |                                          |
| 2R_IV_NIE_4   | N/A                       | N/A              | 494.040   |                    |                         |       |                    |                                          |
| 2R_IV_NIE_5   | N/A                       | N/A              | 510.066   |                    |                         |       |                    |                                          |
| 2R_IV_NIE_6   | N/A                       | N/A              | 524.211   |                    |                         |       |                    |                                          |
| 2R_IV_NIE_7   | N/A                       | N/A              | 542.295   |                    |                         |       |                    |                                          |
| 2R_IV_NIE_8   | N/A                       | N/A              | 550.058   |                    |                         |       |                    |                                          |
| 2R_IV_NIE_9   | N/A                       | N/A              | 580.039   |                    |                         |       |                    |                                          |
| 2R_IV_NIE_10  | N/A                       | N/A              | 606.086   |                    |                         |       |                    |                                          |
| 2R_IV_NIE_11  | N/A                       | N/A              | 632.066   |                    |                         |       |                    |                                          |
| 2R_IV_NIE_13  | N/A                       | N/A              | 638.075   |                    |                         |       |                    |                                          |
| 2R_IV_NIE_14  | N/A                       | N/A              | 650.076   |                    |                         |       |                    |                                          |
| 2R_IV_NIE_15  | N/A                       | N/A              | 656.063   |                    |                         |       |                    |                                          |
| 2R_IV_NIE_16  | N/A                       | N/A              | 664.091   |                    |                         |       |                    |                                          |
| 2R_IV_NIE_17  | N/A                       | N/A              | 666.072   |                    |                         |       |                    |                                          |
| 2R_IV_NIE_18  | N/A                       | N/A              | 672.058   |                    |                         |       |                    |                                          |
| 2R_IV_NIE_19  | N/A                       | N/A              | 682.066   |                    |                         |       |                    |                                          |
| 2R_IV_NIE_20  | N/A                       | N/A              | 688.054   |                    |                         |       |                    |                                          |
| 2R_IV_NIE_21  | N/A                       | N/A              | 724.051   |                    |                         |       |                    |                                          |
| 2R_IV_NIE_24  | N/A                       | N/A              | 800.072   |                    |                         |       |                    |                                          |
| 2R_IV_NIE_25  | N/A                       | N/A              | 802.087   |                    |                         |       |                    |                                          |
| 2R_IV_NIE_26  | N/A                       | N/A              | 806.058   |                    |                         |       |                    |                                          |
| 2R_IV_NIE_27  | N/A                       | N/A              | 816.103   |                    |                         |       |                    |                                          |
| 2R_IV_NIE_28  | N/A                       | N/A              | 832.098   |                    |                         |       |                    |                                          |
| 2R_IV_NIE_29  | N/A                       | N/A              | 838.084   |                    |                         |       |                    |                                          |
| 2R_IV_NIE_30  | N/A                       | N/A              | 852.064   |                    |                         |       |                    |                                          |
| 2R_IV_NIE_31  | N/A                       | N/A              | 874.045   |                    |                         |       |                    |                                          |
| 2R_IV_NIE_32  | N/A                       | N/A              | 876.067   |                    |                         |       |                    |                                          |
| 2R_IV_NIE_33  | N/A                       | N/A              | 906.115   |                    |                         |       |                    |                                          |
| 2R_IV_NIE_34  | N/A                       | N/A              | 908.093   |                    |                         |       |                    |                                          |
| 2R_IV_NIE_35  | N/A                       | N/A              | 918.171   |                    |                         |       |                    |                                          |
| 2R_IV_NIE_36  | N/A                       | N/A              | 922.073   |                    |                         |       |                    |                                          |
| 2R_IV_NIE_37  | N/A                       | N/A              | 926.105   |                    |                         |       |                    |                                          |

|              |     |     |          |
|--------------|-----|-----|----------|
| 2R_IV_NIE_38 | N/A | N/A | 930.075  |
| 2R_IV_NIE_39 | N/A | N/A | 934.072  |
| 2R_IV_NIE_40 | N/A | N/A | 935.075  |
| 2R_IV_NIE_41 | N/A | N/A | 936.087  |
| 2R_IV_NIE_42 | N/A | N/A | 936.125  |
| 2R_IV_NIE_43 | N/A | N/A | 938.096  |
| 2R_IV_NIE_44 | N/A | N/A | 938.103  |
| 2R_IV_NIE_45 | N/A | N/A | 940.120  |
| 2R_IV_NIE_46 | N/A | N/A | 942.034  |
| 2R_IV_NIE_47 | N/A | N/A | 950.068  |
| 2R_IV_NIE_48 | N/A | N/A | 952.082  |
| 2R_IV_NIE_49 | N/A | N/A | 954.098  |
| 2R_IV_NIE_50 | N/A | N/A | 956.054  |
| 2R_IV_NIE_51 | N/A | N/A | 956.115  |
| 2R_IV_NIE_52 | N/A | N/A | 958.070  |
| 2R_IV_NIE_53 | N/A | N/A | 964.083  |
| 2R_IV_NIE_54 | N/A | N/A | 964.141  |
| 2R_IV_NIE_55 | N/A | N/A | 966.099  |
| 2R_IV_NIE_56 | N/A | N/A | 968.118  |
| 2R_IV_NIE_57 | N/A | N/A | 974.065  |
| 2R_IV_NIE_58 | N/A | N/A | 982.094  |
| 2R_IV_NIE_59 | N/A | N/A | 984.071  |
| 2R_IV_NIE_60 | N/A | N/A | 984.111  |
| 2R_IV_NIE_61 | N/A | N/A | 988.081  |
| 2R_IV_NIE_62 | N/A | N/A | 996.047  |
| 2R_IV_NIE_63 | N/A | N/A | 998.126  |
| 2R_IV_NIE_64 | N/A | N/A | 1004.075 |
| 2R_IV_NIE_65 | N/A | N/A | 1024.042 |
| 2R_IV_NIE_66 | N/A | N/A | 1026.057 |
| 2R_IV_NIE_67 | N/A | N/A | 1046.025 |
| 2R_IV_NIE_68 | N/A | N/A | 1056.070 |
| 2R_IV_NIE_69 | N/A | N/A | 1060.105 |
| 2R_IV_NIE_70 | N/A | N/A | 1064.034 |
| 2R_IV_NIE_71 | N/A | N/A | 1082.086 |
| 2R_IV_NIE_72 | N/A | N/A | 1084.126 |
| 2R_IV_NIE_73 | N/A | N/A | 1086.017 |
| 2R_IV_NIE_74 | N/A | N/A | 1086.084 |
| 2R_IV_NIE_75 | N/A | N/A | 1098.142 |
| 2R_IV_NIE_76 | N/A | N/A | 1100.122 |
| 2R_IV_NIE_77 | N/A | N/A | 1104.094 |
| 2R_IV_NIE_78 | N/A | N/A | 1108.066 |
| 2R_IV_NIE_79 | N/A | N/A | 1110.104 |
| 2R_IV_NIE_80 | N/A | N/A | 1114.012 |
| 2R_IV_NIE_81 | N/A | N/A | 1114.136 |
| 2R_IV_NIE_82 | N/A | N/A | 1118.110 |
| 2R_IV_NIE_83 | N/A | N/A | 1126.077 |
| 2R_IV_NIE_84 | N/A | N/A | 1128.117 |
| 2R_IV_NIE_85 | N/A | N/A | 1130.047 |
| 2R_IV_NIE_86 | N/A | N/A | 1140.092 |
| 2R_IV_NIE_87 | N/A | N/A | 1148.059 |
| 2R_IV_NIE_88 | N/A | N/A | 1190.168 |
| 2R_IV_NIE_89 | N/A | N/A | 1198.173 |
| 2R_IV_NIE_90 | N/A | N/A | 1216.047 |
| 2R_IV_NIE_91 | N/A | N/A | 1234.196 |
| 2R_IV_NIE_92 | N/A | N/A | 1236.080 |
| 2R_IV_NIE_93 | N/A | N/A | 1252.073 |

|               |     |     |          |
|---------------|-----|-----|----------|
| 2R_IV_NIE_94  | N/A | N/A | 1258.060 |
| 2R_IV_NIE_95  | N/A | N/A | 1264.131 |
| 2R_IV_NIE_96  | N/A | N/A | 1266.145 |
| 2R_IV_NIE_97  | N/A | N/A | 1288.129 |
| 2R_IV_NIE_98  | N/A | N/A | 1296.128 |
| 2R_IV_NIE_99  | N/A | N/A | 1334.152 |
| 2R_IV_NIE_100 | N/A | N/A | 1348.263 |
| 2R_IV_NIE_101 | N/A | N/A | 1352.257 |
| 2R_IV_NIE_102 | N/A | N/A | 1374.240 |
| 2R_IV_NIE_103 | N/A | N/A | 1386.075 |
| 2R_IV_NIE_104 | N/A | N/A | 1404.086 |
| 2R_IV_NIE_106 | N/A | N/A | 1418.102 |
| 2R_IV_NIE_107 | N/A | N/A | 1434.153 |
| 2R_IV_NIE_108 | N/A | N/A | 1438.124 |
| 2R_IV_NIE_109 | N/A | N/A | 1448.170 |
| 2R_IV_NIE_110 | N/A | N/A | 1460.102 |
| 2R_IV_NIE_111 | N/A | N/A | 1482.090 |
| 2R_IV_NIE_112 | N/A | N/A | 1514.233 |
| 2R_IV_NIE_113 | N/A | N/A | 1566.139 |
| 2R_IV_NIE_114 | N/A | N/A | 1568.155 |
| 2R_IV_NIE_115 | N/A | N/A | 1584.149 |
| 2R_IV_NIE_116 | N/A | N/A | 1590.135 |
| 2R_IV_NIE_117 | N/A | N/A | 1598.126 |
| 2R_IV_NIE_118 | N/A | N/A | 1612.117 |
| 2R_IV_NIE_120 | N/A | N/A | 1720.166 |
| 2R_IV_NIE_121 | N/A | N/A | 1736.159 |
| 2R_IV_NIE_122 | N/A | N/A | 1738.165 |
| 2R_IV_NIE_123 | N/A | N/A | 1740.130 |
| 2R_IV_NIE_124 | N/A | N/A | 1750.175 |
| 2R_IV_NIE_125 | N/A | N/A | 1758.141 |
| 2R_IV_NIE_126 | N/A | N/A | 1762.114 |
| 2R_IV_NIE_127 | N/A | N/A | 1772.159 |
| 2R_IV_NIE_128 | N/A | N/A | 1780.123 |
| 2R_IV_NIE_129 | N/A | N/A | 1784.094 |
| 2R_IV_NIE_130 | N/A | N/A | 1794.139 |
| 2R_IV_NIE_131 | N/A | N/A | 1868.144 |
| 2R_IV_NIE_133 | N/A | N/A | 1884.140 |
| 2R_IV_NIE_134 | N/A | N/A | 1886.154 |
| 2R_IV_NIE_135 | N/A | N/A | 1890.125 |
| 2R_IV_NIE_136 | N/A | N/A | 1892.140 |
| 2R_IV_NIE_137 | N/A | N/A | 1893.145 |
| 2R_IV_NIE_138 | N/A | N/A | 1900.133 |
| 2R_IV_NIE_139 | N/A | N/A | 1914.119 |
| 2R_IV_NIE_140 | N/A | N/A | 1914.147 |
| 2R_IV_NIE_141 | N/A | N/A | 1916.126 |
| 2R_IV_NIE_142 | N/A | N/A | 1918.143 |
| 2R_IV_NIE_143 | N/A | N/A | 1936.096 |
| 2R_IV_NIE_144 | N/A | N/A | 1994.285 |
| 2R_IV_NIE_145 | N/A | N/A | 2016.265 |
| 2R_IV_NIE_148 | N/A | N/A | 2042.138 |
| 2R_IV_NIE_149 | N/A | N/A | 2052.184 |
| 2R_IV_NIE_150 | N/A | N/A | 2060.147 |
| 2R_IV_NIE_151 | N/A | N/A | 2064.119 |
| 2R_IV_NIE_152 | N/A | N/A | 2278.361 |
| 2R_IV_NIE_153 | N/A | N/A | 2300.340 |
| 2R_IV_NIE_154 | N/A | N/A | 2318.224 |

**Table S-34: Screen [IV], T-2RT Comparison Match Any Source**

Comparison of 154 non-isomeric ellagitannins (NIE's) present in strawberry leaves to those previously reported not limited to the same plant tissue. Species previously given incorrect tentative identification by closest matched molecular formula permutations have strikethroughs in this table for increased clarity.

| <u>NIE No.</u> | <u>Matched Fragment(s) (m/z)</u>                        | <u>Precursor Δ (Da)</u> | <u>Mass (Da)</u> | <u>Reported Mass (Da)</u> | <u>Reported Fragment(s) (m/z)</u>                                              | <u>Ref.</u>          | <u>E No.</u>                               | <u>Ellagitannin</u>                                                                                         | <u>Plant Source</u>                                 |
|----------------|---------------------------------------------------------|-------------------------|------------------|---------------------------|--------------------------------------------------------------------------------|----------------------|--------------------------------------------|-------------------------------------------------------------------------------------------------------------|-----------------------------------------------------|
| 2R_IV_NIE_1    | 300.999                                                 | 0.002                   | 482.072          | 482.070                   | 301.00                                                                         | 64                   | E1                                         | 2,3-(S)-HHDP-glucose                                                                                        | Strawberry Leaves                                   |
| 2R_IV_NIE_12   | 481.063;<br>463.051;<br>300.999;<br>275.019;<br>300.918 | 0                       | 634.081          | 634.081                   | 633.073;<br>481.062;<br>463.051;<br>331.067;<br>300.999;<br>275.020;<br>300.92 | 73;62;64;<br>74;NIST | E21;E4,E5,<br>E8;E3,E4,<br>E5;E6,E9        | Isostrictinin, Corilagin, Corilagin - CAS [23094-69-1], Galloyl-HHDP-hexose, galloyl-HHDP-glucose a-c       | Strawberry Leaves, Strawberry Fruit, Not Strawberry |
| 2R_IV_NIE_22   | 300.999                                                 | 0.001                   | 784.077          | 784.076                   | 481; 301;<br>301.04; 275                                                       | 32;72;<br>73;64;74   | E15;E1;E20;<br>E2;E16                      | Pedunculagin, Bis-(HHDP)-glucose                                                                            | Strawberry Leaves, Strawberry Fruit, Not Strawberry |
| 2R_IV_NIE_23   | 633.077;<br>615.065;<br>483.076;<br>313.056;<br>300.998 | 0                       | 786.092          | 786.092                   | 633.074;<br>615.063;<br>463.053;<br>483.078;<br>313.057;<br>300.999;<br>300.97 | 32;73;62;<br>64;74   | E1;E22;E7,<br>E13;E6;E18                   | Digalloyl-HHDP-hexose, Tellimagrandin I                                                                     | Strawberry Leaves, Strawberry Fruit, Not Strawberry |
| 2R_IV_NIE_39   | 915.053;<br>631.057;<br>300.999                         | -0.001                  | 934.072          | 934.073                   | 915.051;<br>631.058;<br>479.046;<br>461.038;<br>300.999                        | 32;73;62;74          | E8,E9;E1,E4;<br>E9,E10,E12,<br>E19;E3,E4   | Galloyl-HHDP-hexose-HHDP, Vescalagin, Castalagin                                                            | Not Strawberry, Strawberry Fruit                    |
| 2R_IV_NIE_41   | 633.073;<br>300.999                                     | 0.001                   | 936.087          | 936.086                   | 935.081;<br>783.069;<br>765.057;<br>633.073;<br>463.052;<br>300.999            | 72;73;62;74          | E7;E5,E9,E19;<br>E20,E21,E26;<br>E5,E8,E12 | Galloyl bis-hexahydroxydiphenoyl (HHDP)-glucose, Stachyurin, Galloyl-diHHDP-hexose, Casuarinin, Casuarictin | Not Strawberry, Strawberry Fruit                    |
| 2R_IV_NIE_44   | 767.075;<br>300.999                                     | 0                       | 938.103          | 938.103                   | 937.095,<br>785.079,<br>767.074,<br>635.198;<br>465.067,<br>300.999            | 62                   | E22,E23                                    | Trigalloyl-HHDP hexose                                                                                      | Strawberry Fruit                                    |
| 2R_IV_NIE_47   | N/A                                                     | N/A                     | 950.068          | 950                       |                                                                                | 73                   | E7                                         | Methyl derivative of stachyurin                                                                             | Not Strawberry                                      |

|               |                     |        |          |  |          |                                                                                 |                   |                                      |                                                                           |                                           |
|---------------|---------------------|--------|----------|--|----------|---------------------------------------------------------------------------------|-------------------|--------------------------------------|---------------------------------------------------------------------------|-------------------------------------------|
| 2R_IV_NIE_48  | 781.056;<br>300.999 | -0.001 | 952.082  |  | 952.083  | 907.085;<br>781.054;<br>605.079;<br>479;<br>425.025;<br>298;<br>273.004;<br>301 | 32;62;74;<br>NIST | E18;E1,E2,E6,E11,<br>E14,E15,E18;E11 | Galloyl-HHDP-<br>DHHDP-hexose,<br>Geraniin, Geraniin -<br>CAS[60976-49-0] | Not<br>Strawberry,<br>Strawberry<br>Fruit |
| 2R_IV_NIE_49  | 300.999             | 0      | 954.098  |  | 954.1    | 301                                                                             | 32;74;NIST        | E16;E13                              | Chebulagic acid,<br>Chebulagic acid -<br>CAS [23094-71-5]                 | Not Strawberry                            |
| 2R_IV_NIE_51  | N/A                 | 0      | 956.115  |  | 956.11   |                                                                                 | 74;NIST           | E14                                  | Chebulinic acid,<br>Chebulinic acid - CAS<br>[18942-26-2]                 | Not Strawberry                            |
| 2R_IV_NIE_77  | N/A                 | 0      | 1104.094 |  | 1104.09  |                                                                                 | 73;74             | E12;E7                               | Hippophaenin B                                                            | Not Strawberry                            |
| 2R_IV_NIE_82  | N/A                 | N/A    | 1118.110 |  | 1118     |                                                                                 | 73                | E14                                  | Methyl derivative of<br>hippophaenin B                                    | Not Strawberry                            |
| 2R_IV_NIE_92  | N/A                 | N/A    | 1236.080 |  | 1236     |                                                                                 | 73                | E15                                  | Elaeagnatin A                                                             | Not Strawberry                            |
| 2R_IV_NIE_105 | 300.998             | 0.004  | 1416.145 |  | 1416.141 | 300.97                                                                          | 64                | E7                                   | dimeric ellagitannin<br>1416 Da                                           | Strawberry<br>Leaves                      |
| 2R_IV_NIE_114 | 765.055;<br>300.999 | 0      | 1568.155 |  | 1568.15  | 765;301                                                                         | 32;73;74          | E2;E27;E19                           | Oenothien B                                                               | Not Strawberry                            |
| 2R_IV_NIE_119 | 300.998             | 0.003  | 1718.150 |  | 1718.147 | 300.96                                                                          | 64                | E8,E9,E10                            | dimeric ellagitannin<br>1718 Da a-c                                       | Strawberry<br>Leaves                      |
| 2R_IV_NIE_131 | 300.999             | 0      | 1868.144 |  | 1868.14  | 301                                                                             | 32;73;74          | E12;E18;E20                          | Cocciferin D2                                                             | Not Strawberry                            |
| 2R_IV_NIE_132 | 300.999             | 0.001  | 1870.159 |  | 1870.158 | 300.99                                                                          | 32;73;64;74       | E4,E6;E24,<br>E26;E17,E18; E22,E23   | Sanguin H-6,<br>Agrimoniin, dimeric<br>ellagitannin 1870 Da               | Strawberry<br>Leaves, Not<br>Strawberry   |
| 2R_IV_NIE_146 | 300.998             | 0.003  | 2020.156 |  | 2020.153 | 300.99                                                                          | 64                | E11,E12, E13,E14                     | dimeric ellagitannin<br>2020 Da a-d                                       | Strawberry<br>Leaves                      |
| 2R_IV_NIE_147 | 300.999             | 0.003  | 2038.167 |  | 2038.164 | 300.96                                                                          | 64                | E15, E16                             | dimeric ellagitannin<br>2038 Da a-b                                       | Strawberry<br>Leaves                      |
|               |                     |        |          |  | 484.159  | 331.0674;<br>313.0574                                                           | 62                | E16                                  | Digalloyl-hexose                                                          | Strawberry<br>Fruit                       |
| 2R_IV_NIE_2   | N/A                 | N/A    | 491.047  |  |          |                                                                                 |                   |                                      |                                                                           |                                           |
| 2R_IV_NIE_3   | N/A                 | N/A    | 492.185  |  |          |                                                                                 |                   |                                      |                                                                           |                                           |
| 2R_IV_NIE_4   | N/A                 | N/A    | 494.040  |  |          |                                                                                 |                   |                                      |                                                                           |                                           |
| 2R_IV_NIE_5   | N/A                 | N/A    | 510.066  |  |          |                                                                                 |                   |                                      |                                                                           |                                           |

|              |     |     |         |         |                                                                     |    |     |                     |                  |
|--------------|-----|-----|---------|---------|---------------------------------------------------------------------|----|-----|---------------------|------------------|
| 2R_IV_NIE_6  | N/A | N/A | 524.211 |         |                                                                     |    |     |                     |                  |
| 2R_IV_NIE_7  | N/A | N/A | 542.295 |         |                                                                     |    |     |                     |                  |
| 2R_IV_NIE_8  | N/A | N/A | 550.058 |         |                                                                     |    |     |                     |                  |
| 2R_IV_NIE_9  | N/A | N/A | 580.039 |         |                                                                     |    |     |                     |                  |
| 2R_IV_NIE_10 | N/A | N/A | 606.086 |         |                                                                     |    |     |                     |                  |
| 2R_IV_NIE_11 | N/A | N/A | 632.066 |         |                                                                     |    |     |                     |                  |
|              |     |     |         | 636.096 | 465                                                                 | 72 | E6  | Trigalloyl glucose  | Strawberry Fruit |
|              |     |     |         | 636.099 | 465.067;<br>313.056;<br>483.077;                                    | 62 | E17 | Trigalloyl hexose   | Strawberry Fruit |
| 2R_IV_NIE_13 | N/A | N/A | 638.075 |         |                                                                     |    |     |                     |                  |
| 2R_IV_NIE_14 | N/A | N/A | 650.076 |         |                                                                     |    |     |                     |                  |
|              |     |     |         | 652.09  |                                                                     | 74 | E10 | Chebularin          | Not Strawberry   |
| 2R_IV_NIE_15 | N/A | N/A | 656.063 |         |                                                                     |    |     |                     |                  |
| 2R_IV_NIE_16 | N/A | N/A | 664.091 |         |                                                                     |    |     |                     |                  |
| 2R_IV_NIE_17 | N/A | N/A | 666.072 |         |                                                                     |    |     |                     |                  |
| 2R_IV_NIE_18 | N/A | N/A | 672.058 |         |                                                                     |    |     |                     |                  |
| 2R_IV_NIE_19 | N/A | N/A | 682.066 |         |                                                                     |    |     |                     |                  |
| 2R_IV_NIE_20 | N/A | N/A | 688.054 |         |                                                                     |    |     |                     |                  |
| 2R_IV_NIE_21 | N/A | N/A | 724.051 |         |                                                                     |    |     |                     |                  |
|              |     |     |         | 788.111 | 787.096;<br>635.088;<br>617.078;<br>465.068;<br>300.999;<br>169.013 | 62 | E27 | Tetragalloyl hexose | Strawberry Fruit |
| 2R_IV_NIE_24 | N/A | N/A | 800.072 |         |                                                                     |    |     |                     |                  |
| 2R_IV_NIE_25 | N/A | N/A | 802.087 |         |                                                                     |    |     |                     |                  |
| 2R_IV_NIE_26 | N/A | N/A | 806.058 |         |                                                                     |    |     |                     |                  |
| 2R_IV_NIE_27 | N/A | N/A | 816.103 |         |                                                                     |    |     |                     |                  |
| 2R_IV_NIE_28 | N/A | N/A | 832.098 |         |                                                                     |    |     |                     |                  |
| 2R_IV_NIE_29 | N/A | N/A | 838.084 |         |                                                                     |    |     |                     |                  |
| 2R_IV_NIE_30 | N/A | N/A | 852.064 |         |                                                                     |    |     |                     |                  |
| 2R_IV_NIE_31 | N/A | N/A | 874.045 |         |                                                                     |    |     |                     |                  |



|              |     |     |         |         |                                                                                             |       |         |                                    |                                        |
|--------------|-----|-----|---------|---------|---------------------------------------------------------------------------------------------|-------|---------|------------------------------------|----------------------------------------|
| 2R_IV_NIE_32 | N/A | N/A | 876.067 |         |                                                                                             |       |         |                                    |                                        |
| 2R_IV_NIE_33 | N/A | N/A | 906.115 |         |                                                                                             |       |         |                                    |                                        |
| 2R_IV_NIE_34 | N/A | N/A | 908.093 |         |                                                                                             |       |         |                                    |                                        |
| 2R_IV_NIE_35 | N/A | N/A | 918.171 |         |                                                                                             |       |         |                                    |                                        |
| 2R_IV_NIE_36 | N/A | N/A | 922.073 |         |                                                                                             |       |         |                                    |                                        |
| 2R_IV_NIE_37 | N/A | N/A | 926.105 |         |                                                                                             |       |         |                                    |                                        |
| 2R_IV_NIE_38 | N/A | N/A | 930.075 |         |                                                                                             |       |         |                                    |                                        |
| 2R_IV_NIE_40 | N/A | N/A | 935.075 |         |                                                                                             |       |         |                                    |                                        |
| 2R_IV_NIE_42 | N/A | N/A | 936.125 |         |                                                                                             |       |         |                                    |                                        |
| 2R_IV_NIE_43 | N/A | N/A | 938.096 |         |                                                                                             |       |         |                                    |                                        |
| 2R_IV_NIE_45 | N/A | N/A | 940.120 |         |                                                                                             |       |         |                                    |                                        |
|              |     |     |         | 940.126 | 939.112;<br>787.098;<br>769.089;<br>617.080;<br>599.070;<br>447.059;<br>300.999;<br>169.014 | 62,74 | E29,E15 | Pentagalloyl hexose,<br>PCC        | Not Strawberry,<br>Strawberry<br>Fruit |
| 2R_IV_NIE_46 | N/A | N/A | 942.034 |         |                                                                                             |       |         |                                    |                                        |
|              |     |     |         | 948     |                                                                                             | 73    | E3      | Methyl derivative of<br>vescalagin | Not Strawberry                         |
|              |     |     |         | 948.051 | 929; 901;<br>883; 875                                                                       | 72    | E2      | Unknown Ellagitannin               | Strawberry<br>Fruit                    |
| 2R_IV_NIE_50 | N/A | N/A | 956.054 |         |                                                                                             |       |         |                                    |                                        |
| 2R_IV_NIE_52 | N/A | N/A | 958.070 |         |                                                                                             |       |         |                                    |                                        |
| 2R_IV_NIE_53 | N/A | N/A | 964.083 |         |                                                                                             |       |         |                                    |                                        |
| 2R_IV_NIE_54 | N/A | N/A | 964.141 |         |                                                                                             |       |         |                                    |                                        |
| 2R_IV_NIE_55 | N/A | N/A | 966.099 |         |                                                                                             |       |         |                                    |                                        |
| 2R_IV_NIE_56 | N/A | N/A | 968.118 |         |                                                                                             |       |         |                                    |                                        |
| 2R_IV_NIE_57 | N/A | N/A | 974.065 |         |                                                                                             |       |         |                                    |                                        |
| 2R_IV_NIE_58 | N/A | N/A | 982.094 |         |                                                                                             |       |         |                                    |                                        |
| 2R_IV_NIE_59 | N/A | N/A | 984.071 |         |                                                                                             |       |         |                                    |                                        |
| 2R_IV_NIE_60 | N/A | N/A | 984.111 |         |                                                                                             |       |         |                                    |                                        |
| 2R_IV_NIE_61 | N/A | N/A | 988.081 |         |                                                                                             |       |         |                                    |                                        |

|              |     |     |          |         |     |            |                       |                                                   |                |
|--------------|-----|-----|----------|---------|-----|------------|-----------------------|---------------------------------------------------|----------------|
| 2R_IV_NIE_62 | N/A | N/A | 996.047  |         |     |            |                       |                                                   |                |
| 2R_IV_NIE_63 | N/A | N/A | 998.126  |         |     |            |                       |                                                   |                |
| 2R_IV_NIE_64 | N/A | N/A | 1004.075 |         |     |            |                       |                                                   |                |
| 2R_IV_NIE_65 | N/A | N/A | 1024.042 |         |     |            |                       |                                                   |                |
| 2R_IV_NIE_66 | N/A | N/A | 1026.057 |         |     |            |                       |                                                   |                |
| 2R_IV_NIE_67 | N/A | N/A | 1046.025 |         |     |            |                       |                                                   |                |
| 2R_IV_NIE_68 | N/A | N/A | 1056.070 |         |     |            |                       |                                                   |                |
| 2R_IV_NIE_69 | N/A | N/A | 1060.105 |         |     |            |                       |                                                   |                |
| 2R_IV_NIE_70 | N/A | N/A | 1064.034 |         |     |            |                       |                                                   |                |
|              |     |     |          | 1068    |     | 73         | E8                    | Pterocarinin A                                    | Not Strawberry |
| 2R_IV_NIE_71 | N/A | N/A | 1082.086 |         |     |            |                       |                                                   |                |
|              |     |     |          | 1084.07 | 301 | 32;74;NIST | E17;E17               | Punicalagin,<br>Punicalagin - CAS<br>[65995-63-3] | Not Strawberry |
| 2R_IV_NIE_72 | N/A | N/A | 1084.126 |         |     |            |                       |                                                   |                |
| 2R_IV_NIE_73 | N/A | N/A | 1086.017 |         |     |            |                       |                                                   |                |
| 2R_IV_NIE_74 | N/A | N/A | 1086.084 |         |     |            |                       |                                                   |                |
| 2R_IV_NIE_75 | N/A | N/A | 1098.142 |         |     |            |                       |                                                   |                |
| 2R_IV_NIE_76 | N/A | N/A | 1100.122 |         |     |            |                       |                                                   |                |
|              |     |     |          | 1102.08 | 301 | 32;73;74   | E10,E11;E10,E11;E1,E2 | Vescavalonic acid,<br>Castavalonic acid           | Not Strawberry |
| 2R_IV_NIE_78 | N/A | N/A | 1108.066 |         |     |            |                       |                                                   |                |
| 2R_IV_NIE_79 | N/A | N/A | 1110.104 |         |     |            |                       |                                                   |                |
| 2R_IV_NIE_80 | N/A | N/A | 1114.012 |         |     |            |                       |                                                   |                |
| 2R_IV_NIE_81 | N/A | N/A | 1114.136 |         |     |            |                       |                                                   |                |
| 2R_IV_NIE_83 | N/A | N/A | 1126.077 |         |     |            |                       |                                                   |                |
| 2R_IV_NIE_84 | N/A | N/A | 1128.117 |         |     |            |                       |                                                   |                |
| 2R_IV_NIE_85 | N/A | N/A | 1130.047 |         |     |            |                       |                                                   |                |
| 2R_IV_NIE_86 | N/A | N/A | 1140.092 |         |     |            |                       |                                                   |                |
| 2R_IV_NIE_87 | N/A | N/A | 1148.059 |         |     |            |                       |                                                   |                |
| 2R_IV_NIE_88 | N/A | N/A | 1190.168 |         |     |            |                       |                                                   |                |

|               |     |     |          |      |  |    |     |                                      |                |
|---------------|-----|-----|----------|------|--|----|-----|--------------------------------------|----------------|
| 2R_IV_NIE_89  | N/A | N/A | 1198.173 |      |  |    |     |                                      |                |
|               |     |     |          | 1206 |  | 73 | E2  | Catechin derivative of vescalagin    | Not Strawberry |
|               |     |     |          | 1208 |  | 73 | E6  | Catechin derivative of stachyurin    | Not Strawberry |
| 2R_IV_NIE_90  | N/A | N/A | 1216.047 |      |  |    |     |                                      |                |
| 2R_IV_NIE_91  | N/A | N/A | 1234.196 |      |  |    |     |                                      |                |
| 2R_IV_NIE_93  | N/A | N/A | 1252.073 |      |  |    |     |                                      |                |
| 2R_IV_NIE_94  | N/A | N/A | 1258.060 |      |  |    |     |                                      |                |
| 2R_IV_NIE_95  | N/A | N/A | 1264.131 |      |  |    |     |                                      |                |
| 2R_IV_NIE_96  | N/A | N/A | 1266.145 |      |  |    |     |                                      |                |
| 2R_IV_NIE_97  | N/A | N/A | 1288.129 |      |  |    |     |                                      |                |
| 2R_IV_NIE_98  | N/A | N/A | 1296.128 |      |  |    |     |                                      |                |
| 2R_IV_NIE_99  | N/A | N/A | 1334.152 |      |  |    |     |                                      |                |
| 2R_IV_NIE_100 | N/A | N/A | 1348.263 |      |  |    |     |                                      |                |
| 2R_IV_NIE_101 | N/A | N/A | 1352.257 |      |  |    |     |                                      |                |
| 2R_IV_NIE_102 | N/A | N/A | 1374.240 |      |  |    |     |                                      |                |
|               |     |     |          | 1376 |  | 73 | E13 | Catechin derivative of hippohaenin B | Not Strawberry |
| 2R_IV_NIE_103 | N/A | N/A | 1386.075 |      |  |    |     |                                      |                |
| 2R_IV_NIE_104 | N/A | N/A | 1404.086 |      |  |    |     |                                      |                |
| 2R_IV_NIE_106 | N/A | N/A | 1418.102 |      |  |    |     |                                      |                |
| 2R_IV_NIE_107 | N/A | N/A | 1434.153 |      |  |    |     |                                      |                |
| 2R_IV_NIE_108 | N/A | N/A | 1438.124 |      |  |    |     |                                      |                |
| 2R_IV_NIE_109 | N/A | N/A | 1448.170 |      |  |    |     |                                      |                |
| 2R_IV_NIE_110 | N/A | N/A | 1460.102 |      |  |    |     |                                      |                |
| 2R_IV_NIE_111 | N/A | N/A | 1482.090 |      |  |    |     |                                      |                |
| 2R_IV_NIE_112 | N/A | N/A | 1514.233 |      |  |    |     |                                      |                |
| 2R_IV_NIE_113 | N/A | N/A | 1566.139 |      |  |    |     |                                      |                |

|               |     |     |          |          |                                                                                                                         |       |         |                                   |                     |
|---------------|-----|-----|----------|----------|-------------------------------------------------------------------------------------------------------------------------|-------|---------|-----------------------------------|---------------------|
|               |     |     |          | 1568.15  | 1415.141;<br>1265.137;<br>1103.059;<br>1085.076;<br>633.074;<br>935.081;<br>783.069;<br>481.061                         | 62    | E24,E25 | Sanguin h10                       | Strawberry<br>Fruit |
|               |     |     |          | 1569.1   | 301                                                                                                                     | 32    | E13     | sanguin H10                       | Not Strawberry      |
| 2R_IV_NIE_115 | N/A | N/A | 1584.149 |          |                                                                                                                         |       |         |                                   |                     |
| 2R_IV_NIE_116 | N/A | N/A | 1590.135 |          |                                                                                                                         |       |         |                                   |                     |
| 2R_IV_NIE_117 | N/A | N/A | 1598.126 |          |                                                                                                                         |       |         |                                   |                     |
| 2R_IV_NIE_118 | N/A | N/A | 1612.117 |          |                                                                                                                         |       |         |                                   |                     |
| 2R_IV_NIE_120 | N/A | N/A | 1720.166 |          |                                                                                                                         |       |         |                                   |                     |
| 2R_IV_NIE_121 | N/A | N/A | 1736.159 |          |                                                                                                                         |       |         |                                   |                     |
| 2R_IV_NIE_122 | N/A | N/A | 1738.165 |          |                                                                                                                         |       |         |                                   |                     |
| 2R_IV_NIE_123 | N/A | N/A | 1740.130 |          |                                                                                                                         |       |         |                                   |                     |
| 2R_IV_NIE_124 | N/A | N/A | 1750.175 |          |                                                                                                                         |       |         |                                   |                     |
| 2R_IV_NIE_125 | N/A | N/A | 1758.141 |          |                                                                                                                         |       |         |                                   |                     |
| 2R_IV_NIE_126 | N/A | N/A | 1762.114 |          |                                                                                                                         |       |         |                                   |                     |
| 2R_IV_NIE_127 | N/A | N/A | 1772.159 |          |                                                                                                                         |       |         |                                   |                     |
| 2R_IV_NIE_128 | N/A | N/A | 1780.123 |          |                                                                                                                         |       |         |                                   |                     |
| 2R_IV_NIE_129 | N/A | N/A | 1784.094 |          |                                                                                                                         |       |         |                                   |                     |
| 2R_IV_NIE_130 | N/A | N/A | 1794.139 |          |                                                                                                                         |       |         |                                   |                     |
|               |     |     |          | 1851     |                                                                                                                         | 73    | E16     | Roburin A                         | Not Strawberry      |
|               |     |     |          | 1865     |                                                                                                                         | 73    | E17     | Methyl derivative of<br>roburin A | Not Strawberry      |
|               |     |     |          | 1870.146 | 1869.143;<br>1567.152;<br>1265.140;<br>1085.076;<br>935.082;<br>783.068;<br>633.074;<br>613.049;<br>481.064;<br>301.000 | 62    | E28     | Galloyl-diHHDP-<br>hexose dimer   | Strawberry<br>Fruit |
|               |     |     |          | 1873.3   | 301                                                                                                                     | 32;73 | E7;E23  | Gemin A                           | Not Strawberry      |

|               |     |     |          |          |                                                  |          |            |                                  |                      |
|---------------|-----|-----|----------|----------|--------------------------------------------------|----------|------------|----------------------------------|----------------------|
|               |     |     |          | 1875.3   | 301                                              | 32       | E14        | rugosin D                        | Not Strawberry       |
| 2R_IV_NIE_133 | N/A | N/A | 1884.140 |          |                                                  |          |            |                                  |                      |
| 2R_IV_NIE_134 | N/A | N/A | 1886.154 |          |                                                  |          |            |                                  |                      |
| 2R_IV_NIE_135 | N/A | N/A | 1890.125 |          |                                                  |          |            |                                  |                      |
| 2R_IV_NIE_136 | N/A | N/A | 1892.140 |          |                                                  |          |            |                                  |                      |
| 2R_IV_NIE_137 | N/A | N/A | 1893.145 |          |                                                  |          |            |                                  |                      |
| 2R_IV_NIE_138 | N/A | N/A | 1900.133 |          |                                                  |          |            |                                  |                      |
| 2R_IV_NIE_139 | N/A | N/A | 1914.119 |          |                                                  |          |            |                                  |                      |
| 2R_IV_NIE_140 | N/A | N/A | 1914.147 |          |                                                  |          |            |                                  |                      |
| 2R_IV_NIE_141 | N/A | N/A | 1916.126 |          |                                                  |          |            |                                  |                      |
|               |     |     |          | 1918.139 | 1557; 1224;<br>1099; 1096;<br>986; 967           | 72       | E3         | Unknown Ellagitannin             | Strawberry<br>Fruit  |
| 2R_IV_NIE_142 | N/A | N/A | 1918.143 |          |                                                  |          |            |                                  |                      |
|               |     |     |          | 1934.125 | 1859; 948;<br>947; 942;<br>942; 929;<br>921; 920 | 72       | E4         | Unknown Ellagitannin             | Strawberry<br>Fruit  |
| 2R_IV_NIE_143 | N/A | N/A | 1936.096 |          |                                                  |          |            |                                  |                      |
| 2R_IV_NIE_144 | N/A | N/A | 1994.285 |          |                                                  |          |            |                                  |                      |
| 2R_IV_NIE_145 | N/A | N/A | 2016.265 |          |                                                  |          |            |                                  |                      |
| 2R_IV_NIE_148 | N/A | N/A | 2042.138 |          |                                                  |          |            |                                  |                      |
| 2R_IV_NIE_149 | N/A | N/A | 2052.184 |          |                                                  |          |            |                                  |                      |
| 2R_IV_NIE_150 | N/A | N/A | 2060.147 |          |                                                  |          |            |                                  |                      |
| 2R_IV_NIE_151 | N/A | N/A | 2064.119 |          |                                                  |          |            |                                  |                      |
| 2R_IV_NIE_152 | N/A | N/A | 2278.361 |          |                                                  |          |            |                                  |                      |
| 2R_IV_NIE_153 | N/A | N/A | 2300.340 |          |                                                  |          |            |                                  |                      |
| 2R_IV_NIE_154 | N/A | N/A | 2318.224 |          |                                                  |          |            |                                  |                      |
|               |     |     |          | 2353.6   | 301                                              | 32       | E3         | oenothien A                      | Not Strawberry       |
|               |     |     |          | 2502.223 | 301                                              | 64       | E19        | trimeric ellagitannin<br>2502 Da | Strawberry<br>Leaves |
|               |     |     |          | 2804.23  | 301                                              | 32;73;74 | E5;E25;E21 | Lambertianin C                   | Not Strawberry       |

|  |  |  |  |  |          |        |    |     |                                  |                              |
|--|--|--|--|--|----------|--------|----|-----|----------------------------------|------------------------------|
|  |  |  |  |  | 2804.229 | 300.99 | 64 | E20 | trimeric ellagitannin<br>2804 Da | <i>Strawberry<br/>Leaves</i> |
|--|--|--|--|--|----------|--------|----|-----|----------------------------------|------------------------------|

## **References:**

(1) Hukkanen, A. T.; Kokko, H. I.; Buchala, A. J.; McDougall, G. J.; Stewart, D.; Kärenlampi, S. O.; Karjalainen, R. O. *Journal of Agricultural and Food Chemistry* **2007**, *55*, 1862-1870.
